# Supplementary material for: Using pseudoalignment and base quality to accurately quantify microbial community composition
Source: PubMed Central journal article supplement (PMC5945057; doi:10.1371/journal.pcbi.1006096), 2018-04-16
Supplement: pcbi.1006096.s001.pdf [file pcbi.1006096.s001.pdf]

## EM algorithm details

For a pooled sample of reads  $r$  with  $r \in 1, \dots, N$ , if we observed which reference haplotypes the reads in our sample originated from,  $\eta$ , and we assumed that conditional on the frequencies  $\mathcal{F}$  the query reads are independent, it would be possible to calculate the maximum likelihood estimate  $\hat{\mathcal{F}}$  using the complete data likelihood, which has the form

$$\mathcal{L}(\mathcal{F}|\eta, r) = P(\eta, r|\mathcal{F}) = \prod_{j=1}^N P(r_j, \eta_j|\mathcal{F}) \propto \prod_{k=1}^M f_k^{\sum_{j=1}^N \eta_{j,k}} \quad (1)$$

In actuality, we observe the reads but the reference haplotypes that they originate from are unobserved. To estimate  $\mathcal{F}$  we therefore employ an EM algorithm. Briefly, the E-step of our procedure can be written

$$\begin{aligned} Q(\mathcal{F}, \mathcal{F}^{(i)}) &= \mathbb{E}_{\eta|r, \mathcal{F}^{(i)}} \left[ \prod_{j=1}^N P(r_j, \eta_j|\mathcal{F}) \right] \\ &\propto \mathbb{E}_{\eta|r, \mathcal{F}^{(i)}} \left[ \sum_{k=1}^M \sum_{j=1}^N \eta_{j,k} \log(f_k^{(i)}) \right] \\ &= \sum_{k=1}^M \sum_{j=1}^N \mathbb{E}_{\eta|r, \mathcal{F}^{(i)}} [\eta_{j,k}] \log(f_k^{(i)}) \end{aligned} \quad (2)$$

where

$$\begin{aligned} \mathbb{E}_{\eta|r, \mathcal{F}^{(i)}} [\eta_{j,k}] &= P(\eta_{j,k} = 1|r, \mathcal{F}^{(i)}) = \frac{P(r_j|\eta_{j,k} = 1)P(\eta_{j,k} = 1|\mathcal{F}^{(i)})}{P(r_j|\mathcal{F}^{(i)})} \\ &= \frac{l_{j,k} f_k^{(i)}}{\sum_{m=1}^M l_{j,m} f_m^{(i)}} \end{aligned} \quad (3)$$

The M-step directly follows from the form of our likelihood, and the algorithm updates the estimates of  $\mathcal{F}$  until convergence according to

$$\hat{f}_k^{(i+1)} = \frac{\sum_{j=1}^N \mathbb{E}_{\eta|r, \mathcal{F}^{(i)}} [\eta_{j,k}]}{N} = \frac{1}{N} \sum_{j=1}^N \left[ \frac{l_{j,k} f_k^{(i)}}{\sum_{m=1}^M l_{j,m} f_m^{(i)}} \right]. \quad (4)$$
