# Supplementary material for: Using pseudoalignment and base quality to accurately quantify microbial community composition
Source: PubMed Central journal article supplement (PMC5945057; doi:10.1371/journal.pcbi.1006096), 2018-04-16
Supplement: pcbi.1006096.s004.pdf [file pcbi.1006096.s004.pdf]

# Simulation Results

February 17, 2018

Values given are average values of AVGRE (Average Relative Error) metric with standard deviations given in parenthesis:

$$AVGRE = \frac{1}{1000} \sum_{i \in M_a \cup M_e} \left| T_{i,e} * \frac{\sum_{i \in M_a} T_{i,a}}{\sum_{i \in M_a \cup M_e} T_{i,e}} - T_{i,a} \right| \quad (1)$$

Where  $M_a$  as the set of actual haploid reference sequences contributing to a pooled sample and  $M_e$  as the set of additional references a method classifies as having a non-zero number of reads that are not truly present. Also, let  $T_{i,e}$  be the count of reads estimated for reference  $i$  and  $T_{i,a}$  is the actual number of simulated reads from reference  $i$  present in the sample.

Table 1: Per reference error rates, 1,000,000 reads

| Read Length | Region    | Samples | Method    | Shannon Diversity |                |                |                |                |                |                |               |               |               |
|-------------|-----------|---------|-----------|-------------------|----------------|----------------|----------------|----------------|----------------|----------------|---------------|---------------|---------------|
|             |           |         |           | [0,0.7]           | [0.7,1.4]      | [1.4,2]        | [2,2.7]        | [2.7,3.4]      | [3.4,4.1]      | [4.1,4.8]      | [4.8,5.5]     | [5.5,6.2]     | [6.2,6.9]     |
| 75bp SE     | Full gene | 110     | Karp      | 439.3 (262.1)     | 372.3 (178.9)  | 379.3 (111.4)  | 304.4 (90.7)   | 268.4 (41.2)   | 260.8 (39)     | 236.2 (21.6)   | 252 (28.4)    | 254.7 (15.5)  | 261.5 (12.2)  |
|             |           |         | UCLUST    | 1229.1 (376.1)    | 1218.9 (246.3) | 1207.1 (168.5) | 1054.1 (209.2) | 1008.2 (55.7)  | 1002.1 (72)    | 894.4 (33.7)   | 874.6 (38.5)  | 827.6 (29)    | 808 (30.8)    |
|             |           |         | SortMeRNA | 1267.3 (367)      | 1275.8 (216.7) | 1257.6 (144.9) | 1112.7 (193.6) | 1039.5 (72)    | 1041 (84.6)    | 942.5 (47.3)   | 928.3 (28.6)  | 880.5 (34.4)  | 883.2 (130.5) |
|             |           |         | Kallisto  | 575.3 (283)       | 548.9 (206.1)  | 553.3 (93.5)   | 439.9 (106.7)  | 393 (38.3)     | 391.9 (49.7)   | 363.4 (23.7)   | 384.3 (31.2)  | 389.4 (21.6)  | 400.5 (15.5)  |
|             |           |         | USEARCH61 | 1276.9 (367.9)    | 1264.4 (191.7) | 1231.9 (149.3) | 1092 (202.6)   | 1021.1 (74)    | 1021.3 (85.1)  | 917.2 (46.4)   | 895 (29.3)    | 848.3 (33.4)  | 828.4 (31.7)  |
|             | V4        | 130     | Karp      | 309.3 (227.7)     | 321.2 (224.5)  | 345.9 (121.2)  | 306.3 (121.6)  | 241.6 (54.5)   | 222.1 (45.4)   | 191.3 (19.8)   | 195.4 (16.4)  | 175.2 (8.3)   | 176.9 (5.4)   |
|             |           |         | UCLUST    | 1083.5 (517.4)    | 1013.1 (368.4) | 1115.6 (203.2) | 1018 (136.9)   | 919 (197.1)    | 867.5 (83.7)   | 831.1 (41.1)   | 818.8 (49.1)  | 755.9 (27.6)  | 713.9 (13.7)  |
|             |           |         | SortMeRNA | 1014.8 (505.2)    | 880.1 (345.4)  | 1073.2 (179.1) | 944.3 (143.4)  | 874.6 (197.3)  | 846.3 (90)     | 860 (52.4)     | 845.7 (54.1)  | 805.1 (29.5)  | 762 (10.6)    |
|             |           |         | Kallisto  | 449.8 (262.1)     | 496.3 (267.7)  | 520.4 (160.2)  | 476.2 (113.3)  | 417.9 (155.1)  | 383.6 (93.7)   | 325.5 (29.5)   | 350.6 (24.3)  | 339.8 (8.5)   | 352 (9.4)     |
|             |           |         | USEARCH61 | 1086.5 (447.6)    | 957 (357.6)    | 1100.7 (166.1) | 995.5 (176.2)  | 885.4 (205.6)  | 852.6 (93.4)   | 855.9 (47.6)   | 832.2 (55.5)  | 778.3 (29.9)  | 726.1 (8.6)   |
| 151bp PE    | Full gene | 130     | Karp      | 93.6 (118.9)      | 50.9 (35)      | 75.2 (43.8)    | 74.7 (37.7)    | 89.4 (55)      | 63.5 (20.8)    | 73.5 (12.2)    | 65.2 (13.1)   | 60.8 (4.7)    | 57.6 (3.8)    |
|             |           |         | UCLUST    | 572.3 (484.7)     | 552.4 (388.9)  | 541.7 (313.8)  | 473.8 (264.9)  | 419.9 (124.4)  | 405.3 (82.4)   | 468.6 (59.1)   | 430.3 (51.2)  | 433 (22.3)    | 419.2 (9.9)   |
|             |           |         | SortMeRNA | 929.2 (540)       | 726.5 (343.7)  | 676.1 (281.3)  | 680.9 (266.3)  | 648.4 (173.2)  | 607.8 (125.3)  | 619.8 (73.1)   | 593.6 (46.1)  | 569.6 (35.4)  | 523 (11.1)    |
|             |           |         | Kallisto  | 15.9 (12.6)       | 46.8 (24.4)    | 52.6 (21.4)    | 71.3 (19.4)    | 77.6 (17.1)    | 72.8 (11.1)    | 76.7 (7.3)     | 75.3 (5.3)    | 76.5 (5.2)    | 77.1 (2.9)    |
|             |           |         | USEARCH61 | 598.1 (591.3)     | 630.4 (436.8)  | 666.3 (354.2)  | 502 (225.4)    | 539.5 (162.3)  | 419.1 (106.6)  | 480 (65.3)     | 439.8 (35.3)  | 461.7 (22)    | 458 (17.2)    |
|             | V4        | 190     | Karp      | 1.2 (2.2)         | 5.5 (16.7)     | 6.2 (18.5)     | 1.9 (1.4)      | 3.2 (4.3)      | 3.5 (2.2)      | 5.5 (3.1)      | 4.7 (1.2)     | 6 (2)         | 6.9 (0.8)     |
|             |           |         | UCLUST    | 48.5 (262.1)      | 56.4 (140.8)   | 77.9 (194.9)   | 21.7 (39)      | 65.1 (91.1)    | 97 (137.6)     | 64.4 (25.9)    | 72 (30.9)     | 80.1 (22.7)   | 101.3 (10.8)  |
|             |           |         | SortMeRNA | 70.6 (264.4)      | 119.5 (278.2)  | 114.3 (207.8)  | 85.8 (72.4)    | 117.7 (137.5)  | 209.8 (144.6)  | 152.1 (68)     | 140.7 (42.6)  | 150.9 (31)    | 147.5 (22.1)  |
|             |           |         | Kallisto  | 65.2 (270.8)      | 93.9 (189.5)   | 83.3 (87.4)    | 70.1 (14)      | 89.6 (46.8)    | 122.5 (53.5)   | 118.8 (21)     | 96.7 (14)     | 95.7 (9.6)    | 101.2 (6.2)   |
|             |           |         | USEARCH61 | 89.8 (348.2)      | 155.6 (320)    | 101.8 (161)    | 56.4 (102.4)   | 119.2 (138.1)  | 125.6 (51.3)   | 151.1 (69.3)   | 121.7 (31.2)  | 110.9 (32.3)  | 135.3 (17.4)  |
| 301bp PE    | Full gene | 170     | Karp      | 97.7 (129.6)      | 149.4 (228.2)  | 105.7 (73.1)   | 97 (59.1)      | 101.7 (63.4)   | 98.8 (27.3)    | 112.7 (27.1)   | 131.7 (33.7)  | 117 (16.9)    | 116.6 (8.2)   |
|             |           |         | UCLUST    | 275.6 (356.4)     | 285.1 (334.8)  | 310.7 (237.5)  | 242.3 (137.1)  | 281.6 (150.3)  | 293.2 (51.4)   | 287.6 (79.4)   | 312.2 (38.5)  | 294.7 (31)    | 301.3 (16.2)  |
|             |           |         | SortMeRNA | 356.6 (407.6)     | 566.2 (457.5)  | 531.9 (246.7)  | 427.6 (151.1)  | 460.8 (145.7)  | 471.9 (63.3)   | 485.6 (81.3)   | 505.2 (47.6)  | 456.1 (36.3)  | 444.8 (19.4)  |
|             |           |         | Kallisto  | 449.5 (376.7)     | 800.7 (304.1)  | 908.6 (253.7)  | 985.8 (249.8)  | 1059.5 (128.8) | 1045.4 (117.6) | 1082.2 (110.4) | 1083.8 (41.3) | 1100.3 (25.2) | 1095.2 (17.5) |
|             |           |         | USEARCH   | 196.1 (238.5)     | 380 (389.1)    | 269 (187)      | 245.3 (121.1)  | 299.2 (138.6)  | 260.7 (42.7)   | 334.5 (58.3)   | 344.5 (51.5)  | 376.7 (43)    | 371.7 (25.6)  |
|             | V4        | 190     | Karp      | 12.6 (54.5)       | 29.5 (139.3)   | 10.1 (10.3)    | 48.8 (61.9)    | 16 (20)        | 14.9 (13.4)    | 12.2 (4.3)     | 16.8 (9.6)    | 15.9 (5.4)    | 17.6 (3.3)    |
|             |           |         | UCLUST    | 63.3 (288.8)      | 72.5 (269.5)   | 54.2 (148.8)   | 15.7 (20.4)    | 39.3 (56.8)    | 19.1 (28.5)    | 38.8 (28.7)    | 56.6 (24)     | 56.5 (16.5)   | 73.3 (18.1)   |
|             |           |         | SortMeRNA | 110.4 (389.9)     | 161.8 (393.1)  | 51.1 (108.5)   | 217.1 (235.3)  | 128.4 (73.3)   | 126.4 (106.9)  | 97.4 (65.2)    | 105 (53.4)    | 104.8 (19.5)  | 101.9 (11.4)  |
|             |           |         | Kallisto  | 484.1 (366.5)     | 873.8 (372.9)  | 990.5 (281.5)  | 1143.9 (205.7) | 1251.8 (174.9) | 1236.2 (97.9)  | 1257.4 (89.1)  | 1255.3 (51.2) | 1243.3 (41.6) | 1272.6 (29.5) |
|             |           |         | USEARCH61 | 54.9 (194.6)      | 66 (243.9)     | 95.6 (177.7)   | 129.8 (141)    | 68.4 (54.8)    | 108.9 (86.2)   | 53.4 (29.7)    | 81.6 (25.2)   | 85.4 (29.9)   | 98.6 (10.5)   |

SE=Single-end, PE=Paired-end

Table 2: Per reference error rates, 100,000 reads

| Read Length | Region    | Samples | Method    | Shannon Diversity |              |              |              |              |              |              |             |             |             |
|-------------|-----------|---------|-----------|-------------------|--------------|--------------|--------------|--------------|--------------|--------------|-------------|-------------|-------------|
|             |           |         |           | [0,0.7]           | [0.7,1.4]    | [1.4,2]      | [2,2.7]      | [2.7,3.4]    | [3.4,4.1]    | [4.1,4.8]    | [4.8,5.5]   | [5.5,6.2]   | [6.2,6.9]   |
| 75bp SE     | Full gene | 130     | Karp      | 39.7 (21)         | 41.1 (14.3)  | 41.5 (15.2)  | 37.5 (8.3)   | 34.7 (6.8)   | 32.9 (2.9)   | 32.5 (1.7)   | 31.7 (1.7)  | 32.3 (1.4)  | 33.7 (0.8)  |
|             |           |         | UCLUST    | 105.9 (45.4)      | 118.1 (18.4) | 113.2 (16.3) | 108.4 (14.7) | 102.6 (10)   | 98.8 (3.3)   | 92.9 (5.2)   | 86.7 (3.6)  | 82.8 (1.8)  | 78.1 (1.1)  |
|             |           |         | SortMeRNA | 113.7 (41.4)      | 122.8 (18.1) | 118.7 (16.6) | 117.5 (12.2) | 109.1 (6.4)  | 103.5 (4.7)  | 100 (3.9)    | 93.9 (1.5)  | 90 (1.7)    | 85.9 (1)    |
|             |           |         | Kallisto  | 55.2 (22.9)       | 53.8 (16.2)  | 53.2 (15.4)  | 48.1 (8.5)   | 44.8 (6.4)   | 42.8 (3.5)   | 42.6 (1.8)   | 41.4 (1.7)  | 42.5 (1.4)  | 44.1 (0.9)  |
|             |           |         | USEARCH61 | 111.2 (41.7)      | 123 (17.6)   | 117.4 (17.5) | 113.9 (14.2) | 105.4 (6.8)  | 98.7 (5.7)   | 94.9 (4.5)   | 88.7 (1.9)  | 84.2 (1.9)  | 79.5 (0.9)  |
|             | V4        | 130     | Karp      | 34 (25.5)         | 31.9 (19.3)  | 34.2 (13.9)  | 37.5 (12.8)  | 29.9 (9)     | 24.9 (5.3)   | 23.8 (3.5)   | 22.5 (2)    | 22.6 (1.5)  | 23.2 (0.8)  |
|             |           |         | UCLUST    | 104.3 (49.1)      | 101.5 (43.4) | 105 (25.1)   | 111.2 (27.1) | 102.2 (13.9) | 91.7 (11.8)  | 88 (6.1)     | 80.6 (4.8)  | 78.6 (3.5)  | 72.5 (1.7)  |
|             |           |         | SortMeRNA | 114.3 (47.2)      | 110.5 (44)   | 106.2 (20.1) | 110.2 (22.1) | 98.9 (13.2)  | 91.3 (7)     | 89.6 (5.4)   | 88.3 (4.6)  | 84.7 (2.3)  | 80.7 (1.2)  |
|             |           |         | Kallisto  | 48.8 (28.8)       | 49.5 (27)    | 55.4 (26.6)  | 52.9 (13.9)  | 45.7 (10.3)  | 40.5 (10.9)  | 37.8 (4.6)   | 36.2 (3.5)  | 37.2 (2.4)  | 37.4 (1.2)  |
|             |           |         | USEARCH61 | 121.1 (48.4)      | 113.9 (42.4) | 108.6 (21)   | 110.3 (22.5) | 99.8 (13.5)  | 88.6 (7.3)   | 87 (6.1)     | 84.6 (5.4)  | 78.9 (2.3)  | 73.4 (1.4)  |
| 151bp PE    | Full gene | 130     | Karp      | 7.3 (8.8)         | 7 (7.3)      | 9 (5.6)      | 7.4 (2.8)    | 6.5 (2)      | 6.4 (1.2)    | 7.1 (1.5)    | 7 (1.3)     | 6.4 (0.6)   | 5.9 (0.5)   |
|             |           |         | UCLUST    | 45.5 (40.8)       | 43.1 (31.5)  | 53.5 (30.9)  | 50.6 (23.2)  | 39.5 (7.7)   | 43.9 (8.6)   | 46.4 (5.9)   | 44.9 (4.8)  | 46.5 (3.1)  | 44.8 (2.7)  |
|             |           |         | SortMeRNA | 65.1 (43.2)       | 45.4 (27.3)  | 75.1 (28.4)  | 73.2 (20)    | 54.9 (10.8)  | 65.4 (5.5)   | 63.1 (3.9)   | 63.5 (4.7)  | 63.1 (3)    | 56.4 (1.9)  |
|             |           |         | Kallisto  | 2.6 (2.4)         | 4.1 (2.2)    | 5.3 (2.4)    | 6.6 (1.6)    | 6.4 (1)      | 6.7 (1)      | 7.7 (0.6)    | 7.6 (0.5)   | 7.9 (0.4)   | 8.8 (0.2)   |
|             |           |         | USEARCH61 | 55.9 (50)         | 44.2 (34)    | 52.9 (23.9)  | 52.8 (20.3)  | 44.8 (12.4)  | 45.5 (5.2)   | 50.3 (4.4)   | 48.8 (5.7)  | 49.2 (2.6)  | 49.1 (2.6)  |
|             | V4        | 190     | Karp      | 0.1 (0.1)         | 0.3 (0.5)    | 0.7 (2.2)    | 0.3 (0.1)    | 0.8 (0.5)    | 0.8 (0.9)    | 0.9 (0.4)    | 0.9 (0.2)   | 1.2 (0.2)   | 1.6 (0.1)   |
|             |           |         | UCLUST    | 5.1 (25.3)        | 4.8 (20)     | 7 (15.1)     | 11.5 (11.7)  | 8.1 (6.9)    | 8.5 (8.1)    | 10 (5.6)     | 7.2 (2.9)   | 8.2 (2.2)   | 10.5 (1.3)  |
|             |           |         | SortMeRNA | 3.8 (12.4)        | 18.4 (33.2)  | 16.6 (27.3)  | 19.2 (20.2)  | 11.9 (8.3)   | 16.7 (10.4)  | 16.4 (7)     | 14.6 (4.1)  | 13.8 (3.1)  | 15.4 (1.5)  |
|             |           |         | Kallisto  | 2.3 (1.7)         | 5.5 (2.9)    | 8.3 (5.2)    | 11.1 (9.4)   | 10.1 (4.9)   | 9 (1.8)      | 10.4 (2.3)   | 10.8 (2.3)  | 10.1 (0.6)  | 11.5 (0.6)  |
|             |           |         | USEARCH61 | 5 (25.2)          | 12.4 (36.8)  | 8.4 (15.7)   | 18.5 (15.5)  | 9.9 (7.6)    | 9.5 (8.1)    | 14.9 (8.4)   | 14.7 (5.4)  | 11.3 (3.3)  | 14.2 (1.2)  |
| 301bp PE    | Full gene | 130     | Karp      | 5.5 (7.7)         | 8.7 (11.5)   | 12 (11.4)    | 13.5 (10.4)  | 9 (3.1)      | 11.7 (4.8)   | 11.1 (1.7)   | 11.7 (1.5)  | 11.4 (1.5)  | 11.5 (0.6)  |
|             |           |         | UCLUST    | 18.7 (20.5)       | 25.4 (29)    | 37.2 (27.6)  | 34.2 (23.5)  | 23.6 (9.8)   | 32.4 (6.8)   | 31.6 (4.6)   | 32.2 (5.9)  | 33.2 (4.3)  | 31.5 (1.7)  |
|             |           |         | SortMeRNA | 40 (35.3)         | 39.8 (30.7)  | 47.6 (22)    | 56.5 (20.9)  | 43.6 (12.8)  | 52.7 (12.4)  | 49.6 (6.1)   | 49.3 (4.9)  | 49.3 (3.8)  | 46.5 (2.1)  |
|             |           |         | Kallisto  | 43.1 (36.3)       | 68.6 (35.7)  | 89.6 (27.3)  | 89.9 (20.8)  | 98.8 (19.4)  | 100.5 (11.7) | 110.9 (13)   | 106 (5.2)   | 111.6 (5.4) | 113.1 (2.3) |
|             |           |         | USEARCH61 | 29.1 (47.3)       | 27.5 (34.6)  | 32.4 (28.4)  | 35.5 (25.7)  | 26.4 (9)     | 34.3 (10.3)  | 31.6 (4.5)   | 32.3 (2.6)  | 32.6 (4)    | 32.7 (2.3)  |
|             | V4        | 190     | Karp      | 0.6 (1.9)         | 0.9 (1)      | 1.5 (2.2)    | 1.8 (1.7)    | 2 (2.9)      | 1.7 (0.9)    | 1.9 (0.3)    | 2.5 (0.5)   | 2.9 (0.6)   | 3.9 (0.3)   |
|             |           |         | UCLUST    | 0.5 (1)           | 4 (20)       | 11.6 (23.1)  | 1.9 (2.7)    | 2.8 (3.6)    | 4.4 (4.1)    | 3.9 (2.3)    | 5.2 (2.7)   | 6.4 (2)     | 7.3 (1.1)   |
|             |           |         | SortMeRNA | 5.2 (27)          | 5.3 (15.1)   | 11.5 (21.8)  | 7.9 (12.3)   | 9.4 (10.9)   | 15.7 (7.1)   | 10.2 (5.4)   | 10.5 (4)    | 10.9 (3.2)  | 10.6 (1.5)  |
|             |           |         | Kallisto  | 62.2 (48.3)       | 100.3 (38.1) | 90.2 (27.9)  | 113.5 (14.4) | 112.3 (17.9) | 118.5 (10.5) | 121.2 (11.8) | 129.2 (6.5) | 128.5 (3.7) | 132.7 (2.2) |
|             |           |         | USEARCH61 | 9.2 (39)          | 6.7 (21.3)   | 6.1 (14.8)   | 5.1 (7.2)    | 6.2 (9.1)    | 4 (2)        | 7 (2.5)      | 8.1 (3.6)   | 8.1 (1.8)   | 11.2 (1.3)  |

SE=Single-end, PE=Paired-end

Table 3: Per species error rates, 1,000,000 reads

| Read Length | Region    | Samples | Method         | Shannon Diversity |               |               |               |               |               |              |              |              |               |
|-------------|-----------|---------|----------------|-------------------|---------------|---------------|---------------|---------------|---------------|--------------|--------------|--------------|---------------|
|             |           |         |                | [0,0.7)           | [0.7,1.4)     | [1.4,2)       | [2,2.7)       | [2.7,3.4)     | [3.4,4.1)     | [4.1,4.8)    | [4.8,5.5)    | [5.5,6.2)    | [6.2,6.9]     |
| 75bp SE     | Full gene | 110     | Karp           | 28.6 (41.4)       | 74.6 (67.4)   | 103.2 (72.5)  | 91.7 (37.2)   | 59.7 (21.4)   | 67.6 (32.8)   | 63.5 (19.4)  | 71.2 (23.4)  | 72.9 (17.7)  | 71.1 (13.7)   |
|             |           |         | Karp-Collapse  | 39.3 (62.1)       | 111.9 (102.9) | 141.4 (68.6)  | 131.9 (88.9)  | 99.3 (30.6)   | 91.1 (29.8)   | 87.1 (15.3)  | 89.8 (20.2)  | 88.6 (14.1)  | 84.3 (12.1)   |
|             |           |         | UCLUST         | 90 (142.5)        | 265.3 (308.5) | 281.6 (259.6) | 267.7 (158.4) | 210.6 (102.1) | 181.2 (78.9)  | 176.2 (48.3) | 176 (50.9)   | 178.3 (40.9) | 170 (40)      |
|             |           |         | SortMeRNA      | 78.9 (120.8)      | 295.5 (368.3) | 291.1 (240.6) | 265.4 (168.6) | 231.4 (109.6) | 193.8 (76.6)  | 182.2 (52.5) | 185.7 (48.1) | 185.8 (38.5) | 199.6 (105.4) |
|             |           |         | Kallisto       | 49.2 (65.3)       | 119.5 (104.7) | 157.6 (106.1) | 141.5 (56.2)  | 96 (30.1)     | 113.2 (49.9)  | 103.2 (28.4) | 113.9 (32.7) | 117.7 (25.1) | 111.1 (20.4)  |
|             |           |         | USEARCH61      | 82 (122)          | 297 (361)     | 297.6 (261.9) | 274 (168.9)   | 230.2 (101.3) | 203.5 (90.4)  | 181.8 (49.2) | 187.9 (49.6) | 185.3 (40.7) | 176.8 (41)    |
|             |           |         | Mothur NB      | 102.1 (183.2)     | 302.5 (329.3) | 326.5 (234.5) | 351.1 (182.2) | 256.4 (86)    | 288.3 (125.5) | 243.9 (60.9) | 251.9 (54.6) | 243 (46.5)   | 282 (205.3)   |
|             |           |         | 16S Classifier | 204.9 (365.4)     | 289.7 (330.9) | 299.6 (283.8) | 383.8 (144.3) | 306.5 (141.3) | 319.4 (152.4) | 297.2 (58)   | 297.6 (83.2) | 305.7 (68.1) | 296.5 (60.6)  |
|             |           |         | SINTAX         | 49.2 (79.6)       | 241.3 (312.3) | 245.6 (227.6) | 241.9 (187.7) | 186.0 (116.8) | 205.2 (103.4) | 199.1 (41.0) | 196.2 (58.2) | 208.3 (51.5) | 203.9 (40.7)  |
|             | V4        | 130     | Karp           | 5.8 (8.2)         | 32 (53.2)     | 15.2 (20.5)   | 15.8 (15.1)   | 30.2 (22.6)   | 23.8 (6.8)    | 18.3 (6)     | 18.9 (6.5)   | 15.1 (4)     | 15.5 (2.3)    |
|             |           |         | Karp-Collapse  | 16.4 (18.6)       | 65.1 (80.9)   | 30.3 (37.4)   | 30.3 (24.1)   | 59.7 (38.8)   | 59 (13.1)     | 52.9 (12.1)  | 54.1 (13.1)  | 48.1 (5)     | 41.5 (3.5)    |
|             |           |         | UCLUST         | 11.4 (14.4)       | 70.9 (132.5)  | 23.1 (29.8)   | 32.5 (37.9)   | 68.5 (55.4)   | 53.6 (21.6)   | 44.9 (9.7)   | 47 (18.3)    | 44.8 (10.4)  | 41 (4.8)      |
|             |           |         | SortMeRNA      | 15.1 (22.9)       | 65.6 (114.8)  | 24.2 (31.7)   | 33.3 (35.7)   | 74.5 (66.5)   | 52.1 (13.4)   | 49.3 (20.2)  | 50.7 (19.6)  | 44.3 (8.3)   | 46.1 (4.3)    |
|             |           |         | Kallisto       | 16.2 (19.3)       | 64.1 (115.8)  | 20.1 (23.3)   | 22.9 (18.8)   | 57.4 (71.1)   | 38.1 (13.5)   | 31.1 (8.4)   | 33.4 (11.8)  | 30.5 (7.2)   | 30.9 (3.9)    |
|             |           |         | USEARCH61      | 18 (26.8)         | 78.4 (122.7)  | 25.6 (33.6)   | 38.5 (44.4)   | 77.1 (67.5)   | 52.5 (13.8)   | 47.2 (15)    | 50.4 (20.8)  | 45.1 (9.9)   | 44.3 (4.6)    |
|             |           |         | Mothur NB      | 13.6 (15.7)       | 96 (133.4)    | 55.6 (102.3)  | 70.8 (76.4)   | 111.5 (73.5)  | 94.9 (40.2)   | 93.4 (32.7)  | 97.8 (16.2)  | 98.3 (15.2)  | 96.8 (4.3)    |
|             |           |         | 16S Classifier | 28.1 (38.2)       | 171.7 (276.1) | 51.8 (97.6)   | 68.4 (92.8)   | 108.1 (98.9)  | 68.6 (35.3)   | 66.9 (30.5)  | 69.5 (11.6)  | 78.5 (15.4)  | 82.8 (5.5)    |
|             |           |         | SINTAX         | 1.8 (<0.1)        | 31.3 (<0.1)   | 10.0 (<0.1)   | 32.5 (53.8)   | 65.8 (52.7)   | 43.9 (27.5)   | 40.4 (16.7)  | 46.3 (19.8)  | 48.0 (16.5)  | 49.9 (6.0)    |
| 151bp PE    | Full gene | 130     | Karp           | 2.8 (4.5)         | 3.7 (6.8)     | 4.3 (8.4)     | 7 (8.1)       | 9.5 (7)       | 8.9 (5)       | 8.1 (3.3)    | 9.9 (2.7)    | 10 (1.5)     | 9.4 (0.8)     |
|             |           |         | Karp-Collapse  | 13.8 (18.8)       | 22.2 (40.4)   | 13.2 (20.9)   | 46.5 (53.5)   | 31.1 (25.8)   | 40.6 (20.5)   | 35.2 (15.8)  | 41 (14.8)    | 40.4 (9.5)   | 39 (3.6)      |
|             |           |         | UCLUST         | 15.2 (21.3)       | 33.8 (74.6)   | 43.6 (75.9)   | 35.6 (32.9)   | 42 (24.8)     | 48.6 (27.6)   | 54.7 (17.1)  | 55.2 (11.8)  | 59.7 (10.7)  | 59.3 (7)      |
|             |           |         | SortMeRNA      | 24 (32.9)         | 48 (86.3)     | 55.5 (73.2)   | 59.6 (28.3)   | 86.3 (45.4)   | 80 (40.7)     | 87.3 (33.8)  | 75 (18.9)    | 81.5 (13.1)  | 74.7 (3.6)    |
|             |           |         | Kallisto       | 1.7 (2.2)         | 7 (15.4)      | 13 (23.1)     | 11.6 (11.3)   | 13.8 (9)      | 16.7 (8)      | 21.5 (8.7)   | 17.4 (4.4)   | 19.9 (3.8)   | 19.1 (1.4)    |
|             |           |         | USEARCH61      | 17 (18.7)         | 56.4 (133.8)  | 69.4 (88.7)   | 39.7 (45)     | 59.1 (38.3)   | 52.4 (27.7)   | 56.2 (20)    | 55 (12.7)    | 67 (12.7)    | 67.3 (3.4)    |
|             |           |         | Mothur NB      | 48.4 (49.3)       | 108.1 (102.9) | 113.8 (103.6) | 120.6 (48.4)  | 161.1 (33.8)  | 175.2 (59.6)  | 180.5 (32.6) | 168.6 (20.9) | 162.7 (14.9) | 140.9 (6.9)   |
|             |           |         | 16S Classifier | 213.6 (354.9)     | 247.2 (317.4) | 292.2 (259.4) | 213 (95.8)    | 273.5 (108.9) | 270.8 (101.5) | 276 (52)     | 240.6 (34)   | 267.9 (32)   | 254.9 (9)     |
|             |           |         | SINTAX         | 20.1 (28.9)       | 32.3 (64.6)   | 61.6 (81.9)   | 51.8 (49.6)   | 79.0 (32.0)   | 96.2 (52.9)   | 98.6 (37.4)  | 97.2 (22.3)  | 102.3 (19.0) | 99.1 (6.2)    |
|             | V4        | 190     | Karp           | <0.1 (<0.1)       | 0.1 (0.5)     | 2.1 (11.3)    | 0.1 (0.2)     | 1.2 (3.3)     | 0.4 (0.7)     | 0.4 (0.8)    | 1.1 (1.2)    | 0.9 (0.7)    | 1.5 (0.7)     |
|             |           |         | Karp-Collapse  | <0.1 (<0.1)       | 0.1 (0.2)     | 2.2 (11.4)    | 0.1 (0.3)     | 1.2 (3.4)     | 0.9 (1.6)     | 0.6 (0.9)    | 1.5 (1.7)    | 0.8 (0.7)    | 1.3 (0.9)     |
|             |           |         | UCLUST         | 1.1 (4.3)         | 0.2 (0.5)     | 0.4 (0.9)     | 15.7 (44.2)   | 15 (44.9)     | 6.5 (12.2)    | 3.6 (7.5)    | 3.6 (6.1)    | 5.7 (5.5)    | 7.5 (2.4)     |
|             |           |         | SortMeRNA      | 1.1 (3.9)         | 2.6 (7)       | 0.5 (1.3)     | 17.1 (45.9)   | 13 (26.8)     | 14 (25.1)     | 7.5 (9.7)    | 9.5 (11.4)   | 10.7 (8.8)   | 9.7 (4.7)     |
|             |           |         | Kallisto       | 0.5 (0.9)         | 29.5 (155.7)  | 2.1 (5.7)     | 1.5 (3.1)     | 12.7 (28.1)   | 24.5 (45.9)   | 8.7 (10.3)   | 6.6 (5)      | 6.9 (3.8)    | 7.3 (1.8)     |
|             |           |         | USEARCH61      | 0.8 (3.9)         | 67.8 (251.7)  | 1.9 (5.3)     | 0.2 (0.5)     | 17.2 (49.9)   | 15 (26.1)     | 12.3 (14.6)  | 7.8 (8.7)    | 9.6 (6.5)    | 8.4 (2.2)     |
|             |           |         | Mothur NB      | 61.7 (81)         | 54.8 (78.7)   | 89.9 (104.7)  | 112.2 (132.3) | 99.3 (77.2)   | 132.6 (49.2)  | 102.8 (38.1) | 94.4 (18.5)  | 99.2 (13.2)  | 103.9 (11.7)  |
|             |           |         | 16S Classifier | 165.2 (335.8)     | 133.2 (242.7) | 123.2 (123.9) | 82.5 (107)    | 67.1 (42)     | 126.7 (87.2)  | 79.2 (34.3)  | 69.4 (16.4)  | 73.2 (13.3)  | 81.8 (12.5)   |
|             |           |         | SINTAX         | 2.4 (5.2)         | 21.7 (60.5)   | 35.4 (86.0)   | 18.2 (45.5)   | 47.3 (61.9)   | 80.8 (100.7)  | 28.9 (24.6)  | 26.3 (16.5)  | 20.8 (10.3)  | 29.1 (6.6)    |

SE=Single-end, PE=Paired-end

Table 4: **Per species error rates, 1,000,000 reads**

| Read Length | Region    | Samples | Method         | Shannon Diversity |               |               |               |               |              |              |              |              |              |         |
|-------------|-----------|---------|----------------|-------------------|---------------|---------------|---------------|---------------|--------------|--------------|--------------|--------------|--------------|---------|
|             |           |         |                | [0,0.7]           | [0.7,1.4]     | [1.4,2]       | [2,2.7]       | [2.7,3.4]     | [3.4,4.1]    | [4.1,4.8]    | [4.8,5.5]    | [5.5,6.2]    | [6.2,6.9]    |         |
| 301bp PE    | Full gene | 170     | Karp           | 0.7 (1)           | 2.3 (2.5)     | 9.3 (19.9)    | 13.3 (20.7)   | 13.3 (11.7)   | 8.6 (6.5)    | 14.4 (4.7)   | 13.7 (3.2)   | 16.1 (4.4)   | 14.8 (2.9)   |         |
|             |           |         | Karp-Collapse  | 2.9 (5)           | 14.9 (27.6)   | 17.6 (41.2)   | 12.5 (18.6)   | 17.1 (18)     | 14.5 (7.3)   | 21.7 (12.5)  | 19 (5.7)     | 18.6 (5)     | 16.5 (2.4)   |         |
|             |           |         | UCLUST         | 6.3 (13.3)        | 16 (33)       | 23.5 (63.1)   | 26.6 (40.2)   | 54.7 (78.7)   | 34.5 (31.6)  | 37.3 (17.2)  | 39.9 (9.7)   | 43.8 (12.2)  | 42.3 (5.9)   |         |
|             |           |         | SortMeRNA      | 15.1 (31.7)       | 48 (85.1)     | 43.7 (47.4)   | 53.6 (54.9)   | 73.1 (73.7)   | 60.6 (31.6)  | 66.2 (24.3)  | 75.2 (14.3)  | 72.9 (12.9)  | 71.4 (10.1)  |         |
|             |           |         | Kallisto       | 27.8 (54.7)       | 112.9 (228.6) | 60.8 (74.3)   | 194.6 (181.1) | 254.9 (165.4) | 255.8 (68.4) | 256.1 (100)  | 275.4 (29.4) | 310.1 (61.8) | 307.6 (19.4) |         |
|             |           |         | USEARCH61      | 6.8 (16.7)        | 16.1 (28.8)   | 40.7 (100.2)  | 29.5 (33.2)   | 36.4 (27)     | 24.8 (12.9)  | 38.7 (17.5)  | 38.1 (8.2)   | 49.3 (12)    | 52 (10.9)    |         |
|             |           |         | Mothur NB      | NA (NA)           | NA (NA)       | NA (NA)       | NA (NA)       | NA (NA)       | NA (NA)      | NA (NA)      | NA (NA)      | NA (NA)      | NA (NA)      | NA (NA) |
|             |           |         | 16S Classifier | 203.8 (354.4)     | 291.8 (291.1) | 240 (216.8)   | 249.6 (150.8) | 251.7 (144.5) | 241.7 (59.8) | 238.9 (79.5) | 252.9 (27.2) | 251.4 (39.3) | 251 (16.5)   |         |
|             |           |         | SINTAX         | 7.7 (16.1)        | 40.7 (81.1)   | 48.7 (117.2)  | 80.7 (84.4)   | 106.8 (120.5) | 101.5 (50.6) | 87.1 (35.5)  | 94.9 (16.7)  | 103.2 (21.2) | 100.4 (17.4) |         |
|             | V4        | 190     | Karp           | 0.5 (1.9)         | 0.3 (1.1)     | 0.9 (4.2)     | 3.8 (10.2)    | 0.5 (0.6)     | 0.9 (1.4)    | 1.4 (1.2)    | 2.3 (1.8)    | 1.5 (1.3)    | 1.3 (0.3)    |         |
|             |           |         | Karp-Collapse  | 0.5 (2)           | 0.1 (0.2)     | 0.1 (0.3)     | 0.8 (2.1)     | 0.4 (0.6)     | 0.3 (0.3)    | 0.4 (0.4)    | 1.1 (2.7)    | 1 (1.5)      | 0.5 (0.3)    |         |
|             |           |         | UCLUST         | <0.1 (0.1)        | 3.8 (18.2)    | 0.1 (0.6)     | <0.1 (0.1)    | 5.1 (11.1)    | 0.8 (1.2)    | 2.7 (6.5)    | 3.4 (5.2)    | 4.7 (4.8)    | 6 (3)        |         |
|             |           |         | SortMeRNA      | 2 (6.6)           | 4.2 (18)      | 2.5 (11.4)    | 7.2 (19.1)    | 9.8 (15.3)    | 3.7 (8.6)    | 10.8 (17.7)  | 7.4 (7)      | 8.4 (10.7)   | 5.7 (2.5)    |         |
|             |           |         | Kallisto       | 5.4 (7.5)         | 14.5 (30)     | 20.9 (75.6)   | 28 (42.2)     | 66.8 (74.3)   | 79.4 (82.1)  | 106 (54)     | 107.2 (45.8) | 101.6 (35.4) | 107.6 (18.3) |         |
|             |           |         | USEARCH61      | 0.6 (2.4)         | 0.1 (0.2)     | 0.1 (0.3)     | 3.3 (5.6)     | 1.8 (3.5)     | 2.3 (3.3)    | 2.6 (4)      | 3.6 (5.8)    | 5.7 (3.4)    | 6.2 (2.9)    |         |
|             |           |         | Mothur NB      | 303 (706.3)       | 48.3 (80.4)   | 68.8 (90.3)   | 43.4 (65.9)   | 109.6 (83.1)  | 99.2 (63.2)  | 126.5 (45.2) | 108.3 (23.4) | 115.5 (24.4) | 98.1 (6.6)   |         |
|             |           |         | 16S Classifier | 160 (363.6)       | 152.5 (265.7) | 111.2 (168.6) | 60.8 (93.5)   | 84.7 (78.3)   | 81.6 (72.3)  | 101.3 (43.2) | 85.5 (25.1)  | 93.6 (26)    | 79.5 (9)     |         |
|             |           |         | SINTAX         | <0.1 (0.1)        | 72.1 (218.4)  | 0.2 (0.6)     | 58.3 (182.3)  | 10.2 (12.0)   | 36.6 (52.6)  | 35.2 (34.6)  | 23.8 (9.1)   | 33.2 (11.1)  | 28.7 (6.8)   |         |

SE=Single-end, PE=Paired-end

Table 5: Per genus error rates, 1,000,000 reads

| Read Length | Region    | Samples | Method         | Shannon Diversity |                |                |                |                |                |               |              |                |                |
|-------------|-----------|---------|----------------|-------------------|----------------|----------------|----------------|----------------|----------------|---------------|--------------|----------------|----------------|
|             |           |         |                | [0,0.7)           | [0.7,1.4)      | [1.4,2)        | [2,2.7)        | [2.7,3.4)      | [3.4,4.1)      | [4.1,4.8)     | [4.8,5.5)    | [5.5,6.2)      | [6.2,6.9]      |
| 75bp SE     | Full gene | 110     | Karp           | 120.3 (97.5)      | 201.7 (165.9)  | 228.2 (46.5)   | 229.9 (63.1)   | 170.9 (32.5)   | 165.5 (35.2)   | 166.2 (35.3)  | 166.3 (27.7) | 153.3 (19.4)   | 135.3 (23.6)   |
|             |           |         | Karp-Collapse  | 134 (116.8)       | 207.7 (164.1)  | 262.5 (64.8)   | 231.9 (69.7)   | 193.3 (29.6)   | 179.4 (37.4)   | 184.2 (35.6)  | 174.7 (21)   | 161.1 (14.4)   | 142.2 (18.4)   |
|             |           |         | UCLUST         | 374 (309.4)       | 488 (409.6)    | 557.2 (171.4)  | 503.8 (151.8)  | 430.7 (60.5)   | 402.9 (93)     | 386.3 (64.5)  | 362.1 (60.8) | 330 (39.3)     | 279 (45.3)     |
|             |           |         | SortMeRNA      | 366.9 (296.9)     | 505 (426.9)    | 536.7 (141)    | 503.5 (136.2)  | 436.2 (54.8)   | 421.9 (77.5)   | 407.3 (68.4)  | 387.8 (57.5) | 357.6 (36)     | 354 (220.2)    |
|             |           |         | Kallisto       | 246.1 (148.5)     | 324.4 (227.7)  | 388.9 (72.4)   | 379.1 (92.4)   | 297.5 (48.4)   | 291.7 (51.1)   | 281.7 (47)    | 274.8 (39.3) | 251.7 (28.7)   | 218.9 (36.4)   |
|             |           |         | USEARCH61      | 400.7 (317.7)     | 517.9 (432.1)  | 562.4 (156.6)  | 513.7 (147.3)  | 441 (60.3)     | 419 (83.9)     | 399.5 (65.7)  | 374.5 (58.6) | 338.5 (36.9)   | 288.2 (46.1)   |
|             |           |         | Mothur NB      | 409.9 (378.6)     | 454.2 (348.5)  | 529.2 (215.6)  | 596.1 (163.6)  | 553.9 (99.1)   | 586.4 (124.7)  | 540.2 (64.2)  | 544.1 (62)   | 533.5 (54.8)   | 536.6 (136.9)  |
|             |           |         | 16S Classifier | 1722 (648.2)      | 1190.5 (884.1) | 1550.5 (424.4) | 1799 (221.8)   | 1704.5 (220.7) | 1679.8 (297.9) | 1663 (202.4)  | 1654 (227.7) | 1636.6 (236.6) | 1595.3 (242.3) |
|             |           |         | SINTAX         | 169.4 (210.8)     | 345.1 (324.9)  | 389.4 (163.4)  | 440.7 (123.4)  | 413.2 (81.9)   | 399.0 (115.0)  | 405.0 (49.9)  | 403.4 (71.7) | 393.8 (59.2)   | 373.2 (62.2)   |
|             | V4        | 130     | Karp           | 31.3 (32.9)       | 81 (77.5)      | 84.9 (49.9)    | 84.2 (37.9)    | 70.9 (29.5)    | 68.2 (13.6)    | 65.1 (16.5)   | 64.5 (11.5)  | 53.6 (4.8)     | 44.9 (3.9)     |
|             |           |         | Karp-Collapse  | 125 (201)         | 176.5 (125.3)  | 193.6 (81.4)   | 177.6 (60.8)   | 179.6 (52.9)   | 166.3 (20.7)   | 172.4 (28)    | 162.1 (24)   | 129.9 (12.7)   | 101.4 (4.8)    |
|             |           |         | UCLUST         | 112.2 (221.8)     | 161.9 (173)    | 155.2 (85)     | 158.2 (77.2)   | 152.9 (55.5)   | 141.2 (30)     | 147.3 (29.7)  | 144.9 (29.6) | 116.7 (14)     | 91.9 (6)       |
|             |           |         | SortMeRNA      | 100.9 (209.6)     | 144.7 (149.2)  | 159.3 (103.1)  | 160.3 (87.3)   | 145.1 (57.4)   | 137.5 (18.5)   | 153.8 (35.2)  | 151.4 (22.3) | 123.3 (13.2)   | 102.2 (6.8)    |
|             |           |         | Kallisto       | 71.3 (70.4)       | 156 (145.1)    | 141.2 (61.2)   | 145 (41.2)     | 135.1 (43.1)   | 126.8 (22.1)   | 124.6 (24.7)  | 122.1 (15.8) | 102.3 (7.4)    | 85.7 (5.3)     |
|             |           |         | USEARCH61      | 114.5 (217.1)     | 170 (171.7)    | 175.2 (109.4)  | 172 (89.5)     | 154 (55.1)     | 148.7 (26.3)   | 152 (34.3)    | 151 (24.9)   | 120.4 (14.1)   | 96.6 (6.3)     |
|             |           |         | Mothur NB      | 198.2 (441.1)     | 225.9 (178.4)  | 325 (146.9)    | 321.6 (118.9)  | 330.6 (53.3)   | 325.4 (51.3)   | 332.6 (45.4)  | 316.9 (34.2) | 310.9 (32.7)   | 285.7 (10.3)   |
|             |           |         | 16S Classifier | 613.6 (798.1)     | 652.4 (595.8)  | 658.2 (407.7)  | 691.6 (256.6)  | 669.5 (167)    | 677.7 (173.9)  | 680.6 (108.2) | 663.1 (93.6) | 714.5 (36.7)   | 693.3 (22.4)   |
|             |           |         | SINTAX         | 41.5 (54.0)       | 89.2 (79.9)    | 106.6 (71.8)   | 139.4 (64.7)   | 179.1 (62.3)   | 173.6 (37.9)   | 161.5 (40.8)  | 177.5 (33.6) | 182.5 (17.9)   | 170.6 (7.9)    |
| 151bp PE    | Full gene | 130     | Karp           | 4.5 (7.6)         | 8.8 (10)       | 8.3 (10.2)     | 9.5 (9.5)      | 12.4 (7.5)     | 12.6 (7.3)     | 12.6 (3.2)    | 14.8 (3.4)   | 15.3 (1.7)     | 14.6 (1.2)     |
|             |           |         | Karp-Collapse  | 17.7 (36.3)       | 57.5 (107.3)   | 17.6 (19.5)    | 51.7 (66.4)    | 40.8 (29.8)    | 36.2 (10.3)    | 43 (14.6)     | 45 (13.3)    | 48.3 (10.6)    | 49.7 (5.6)     |
|             |           |         | UCLUST         | 38.5 (63.6)       | 87.1 (132.5)   | 52 (86.4)      | 66.5 (83.2)    | 51.4 (28.5)    | 63.1 (33.5)    | 65.9 (16.6)   | 59.6 (13.4)  | 70.1 (10.7)    | 66.9 (4.3)     |
|             |           |         | SortMeRNA      | 53.1 (58.6)       | 110.7 (123.3)  | 87.5 (101.4)   | 113.9 (52.3)   | 105.3 (53.4)   | 116.4 (61.7)   | 100.5 (31)    | 102.6 (19.5) | 99.4 (14.4)    | 87.7 (5.6)     |
|             |           |         | Kallisto       | 8.3 (11.5)        | 25.4 (21.8)    | 37.3 (25.9)    | 44.6 (27.7)    | 51.9 (11.8)    | 53.3 (8.4)     | 54.2 (11.9)   | 53.3 (5.2)   | 55.6 (4.5)     | 55.2 (2.8)     |
|             |           |         | USEARCH61      | 24 (28.9)         | 101 (122.2)    | 73.3 (89)      | 49.8 (39.7)    | 68.9 (48.8)    | 62.4 (24.6)    | 71.7 (17)     | 70.2 (15)    | 78 (12.5)      | 76.2 (5.9)     |
|             |           |         | Mothur NB      | 121.7 (90.7)      | 201.9 (139.5)  | 212.8 (94.8)   | 264.6 (92.3)   | 247.2 (95.3)   | 251.3 (95.2)   | 218.3 (53.1)  | 210.3 (19.5) | 199.9 (24)     | 167.8 (13.7)   |
|             |           |         | 16S Classifier | 1393 (844.9)      | 1240.4 (645)   | 1306.4 (531.2) | 1184.9 (346.1) | 1345.6 (159.5) | 1385.8 (130.9) | 1352.3 (99.9) | 1326 (45.9)  | 1347.4 (59.8)  | 1347.5 (15.5)  |
|             |           |         | SINTAX         | 37.9 (47.4)       | 99.2 (149.6)   | 87.0 (98.4)    | 113.1 (56.8)   | 118.8 (44.5)   | 133.6 (57.1)   | 130.5 (33.9)  | 126.8 (27.1) | 136.3 (18.0)   | 126.4 (5.7)    |
|             | V4        | 190     | Karp           | 0.2 (0.3)         | 2.4 (12)       | 4.2 (16.3)     | 0.7 (1.1)      | 2.1 (4.2)      | 1.6 (1.5)      | 3.1 (2.5)     | 2.5 (1)      | 2.4 (0.7)      | 3 (0.8)        |
|             |           |         | Karp-Collapse  | 0.2 (0.7)         | 0.4 (1.2)      | 4.2 (16.6)     | 0.6 (1.3)      | 1.9 (4.3)      | 2.5 (3.1)      | 1.7 (1.6)     | 1.8 (1.2)    | 1.3 (0.9)      | 2 (1)          |
|             |           |         | UCLUST         | 0.7 (2.1)         | 0.2 (0.3)      | 36.7 (174.8)   | 4.6 (7.8)      | 21.2 (46.4)    | 14.9 (25.4)    | 13.2 (19.1)   | 11.8 (12.9)  | 11.8 (7.9)     | 15.1 (4.6)     |
|             |           |         | SortMeRNA      | 7.8 (35.9)        | 14.7 (56.7)    | 19.4 (65.3)    | 15.6 (27.6)    | 18.3 (40.9)    | 33.8 (40.2)    | 25.6 (19.3)   | 27.1 (12.9)  | 29.1 (13.2)    | 31.7 (12.9)    |
|             |           |         | Kallisto       | 5.9 (7.3)         | 8.7 (10.2)     | 29.3 (26.3)    | 33 (19.1)      | 35.6 (41.5)    | 49 (39.2)      | 42.8 (8.6)    | 37.2 (8.2)   | 35.9 (3.8)     | 36.9 (2.4)     |
|             |           |         | USEARCH61      | 11.2 (62)         | 37 (173.1)     | 13.4 (62.1)    | 5.6 (9.1)      | 24.1 (46.6)    | 31.1 (47.2)    | 24.3 (16)     | 20.7 (18.6)  | 23.1 (9.7)     | 24.1 (7.3)     |
|             |           |         | Mothur NB      | 93.3 (86.2)       | 129.4 (95.4)   | 246 (196.5)    | 305.5 (117.4)  | 242.4 (47.3)   | 319.5 (38.1)   | 311.5 (41.2)  | 297 (36.2)   | 277.4 (16.7)   | 251.1 (11.4)   |
|             |           |         | 16S Classifier | 299.2 (653.9)     | 277.4 (402.6)  | 348.3 (365.4)  | 422.7 (396.9)  | 247.8 (118.7)  | 366.5 (193.1)  | 329.2 (84)    | 342.1 (83.2) | 320 (56.8)     | 317.9 (33.6)   |
|             |           |         | SINTAX         | 3.7 (8.7)         | 14.6 (55.4)    | 87.9 (258.9)   | 60.7 (127.4)   | 36.1 (59.6)    | 80.9 (77.9)    | 60.2 (39.3)   | 50.8 (47.8)  | 36.6 (14.9)    | 40.1 (8.9)     |

SE=Single-end, PE=Paired-end

Table 6: Per genus error rates, 1,000,000 reads

| Read Length | Region    | Samples | Method         | Shannon Diversity |                |                |                |               |               |                |              |               |              |         |
|-------------|-----------|---------|----------------|-------------------|----------------|----------------|----------------|---------------|---------------|----------------|--------------|---------------|--------------|---------|
|             |           |         |                | [0,0.7]           | [0.7,1.4]      | [1.4,2]        | [2,2.7]        | [2.7,3.4]     | [3.4,4.1]     | [4.1,4.8]      | [4.8,5.5]    | [5.5,6.2]     | [6.2,6.9]    |         |
| 301bp PE    | Full gene | 170     | Karp           | 7.1 (20.1)        | 6 (11.2)       | 14.4 (17.4)    | 19.6 (23.7)    | 16.8 (16.2)   | 12.1 (4.4)    | 21.6 (9.1)     | 19.4 (2.2)   | 22.5 (2.7)    | 24.8 (2.5)   |         |
|             |           |         | Karp-Collapse  | 9.2 (10.2)        | 15.7 (28.5)    | 26.3 (37.5)    | 20.9 (20.6)    | 21.8 (23.3)   | 19.4 (9.3)    | 22 (11)        | 20.1 (4.5)   | 21.4 (3.6)    | 19.8 (2.3)   |         |
|             |           |         | UCLUST         | 23 (59)           | 15.9 (33)      | 30.3 (43.2)    | 27.8 (38)      | 42.3 (49.8)   | 38.3 (37.6)   | 42 (22.4)      | 37.7 (10.8)  | 47.7 (10.7)   | 40.5 (5.6)   |         |
|             |           |         | SortMeRNA      | 42.2 (88.1)       | 46.7 (64.8)    | 93.4 (85.5)    | 71.1 (55.1)    | 75.3 (71.8)   | 76.3 (35.1)   | 79.5 (24.4)    | 81.5 (20.9)  | 79.4 (10.1)   | 72.9 (7.5)   |         |
|             |           |         | Kallisto       | 313.5 (368.4)     | 468 (380)      | 636.5 (277.7)  | 688 (218.7)    | 782 (175.3)   | 741.7 (174.4) | 816.1 (142.6)  | 792.6 (61.3) | 825.7 (55)    | 814.9 (25)   |         |
|             |           |         | USEARCH61      | 21.2 (50.3)       | 18.7 (34.4)    | 41.8 (48)      | 27.4 (34.8)    | 34.4 (35.9)   | 24.2 (8.9)    | 44.1 (26)      | 44 (11.2)    | 48.5 (9)      | 50 (9)       |         |
|             |           |         | Mothur NB      | NA (NA)           | NA (NA)        | NA (NA)        | NA (NA)        | NA (NA)       | NA (NA)       | NA (NA)        | NA (NA)      | NA (NA)       | NA (NA)      | NA (NA) |
|             |           |         | 16S Classifier | 1049.8 (861.4)    | 1272.6 (572.3) | 1328.5 (462.9) | 1188.2 (210.2) | 1277.6 (279)  | 1168.9 (190)  | 1264.5 (178.9) | 1232 (87.2)  | 1231.3 (39.9) | 1223 (20.6)  |         |
|             |           |         | SINTAX         | 25.9 (36.1)       | 53.3 (97.8)    | 93.2 (91.2)    | 87.3 (59.1)    | 109.6 (88.6)  | 109.7 (68.9)  | 103.8 (48.5)   | 104.0 (13.8) | 118.7 (18.0)  | 105.7 (11.3) |         |
|             | V4        | 190     | Karp           | 4.2 (20.9)        | 1.1 (1.4)      | 5.2 (8)        | 24 (41.4)      | 6.6 (7.7)     | 4.7 (2.6)     | 4.3 (1.3)      | 6.3 (3.3)    | 5.6 (1.3)     | 5.4 (1)      |         |
|             |           |         | Karp-Collapse  | 0.7 (2.5)         | 0.2 (0.8)      | 0.8 (1.8)      | 4.4 (13.3)     | 0.6 (0.7)     | 1 (1.5)       | 0.5 (0.4)      | 1.3 (2.9)    | 0.8 (0.5)     | 0.7 (0.5)    |         |
|             |           |         | UCLUST         | 0.1 (0.4)         | 2.9 (14.5)     | 1.5 (9.4)      | 5.3 (16)       | 3.8 (10.6)    | 4.8 (13.7)    | 2.7 (6.6)      | 1.2 (1)      | 6.4 (5)       | 7.9 (2.8)    |         |
|             |           |         | SortMeRNA      | 1.8 (5.7)         | 8.7 (31.1)     | 4.4 (15.4)     | 2.7 (3.1)      | 6.4 (15.9)    | 17.2 (41.6)   | 17.2 (28)      | 7.1 (7)      | 18.3 (12.1)   | 12.2 (3.7)   |         |
|             |           |         | Kallisto       | 69.8 (117.7)      | 207.2 (264.6)  | 430.5 (318.3)  | 565.1 (199.5)  | 533 (175.4)   | 592.3 (112.4) | 561.6 (103.2)  | 550.4 (57.3) | 570.4 (41.2)  | 558 (30.5)   |         |
|             |           |         | USEARCH61      | 0.8 (3.4)         | 1 (3.8)        | 3.5 (14.5)     | 0.5 (1)        | 4.7 (12.3)    | 10.1 (17.6)   | 5.8 (9.3)      | 6 (9.4)      | 7.2 (3.9)     | 9.4 (3.9)    |         |
|             |           |         | Mothur NB      | 133.2 (387.6)     | 207.9 (155.1)  | 393.5 (262.2)  | 308.4 (76.4)   | 317.8 (73.1)  | 309.4 (28.7)  | 306.9 (29.1)   | 292.3 (26.3) | 275.6 (12.7)  | 242.1 (9.6)  |         |
|             |           |         | 16S Classifier | 28.4 (39.5)       | 342.1 (518.5)  | 433.8 (405.3)  | 396.7 (294.1)  | 344.8 (242.8) | 367.7 (72.8)  | 329 (85.5)     | 324.3 (24.9) | 353.1 (41.3)  | 329.6 (23.8) |         |
|             |           |         | SINTAX         | 2.7 (7.1)         | 100.4 (363.6)  | 47.8 (118.9)   | 26.8 (44.0)    | 28.8 (51.7)   | 74.6 (125.3)  | 58.3 (38.8)    | 39.4 (21.0)  | 48.6 (16.9)   | 40.9 (8.0)   |         |

SE=Single-end, PE=Paired-end

Table 7: Per family error rates, 1,000,000 reads

| Read Length | Region    | Samples | Method         | Shannon Diversity |                |                |                |                |                |               |               |               |               |
|-------------|-----------|---------|----------------|-------------------|----------------|----------------|----------------|----------------|----------------|---------------|---------------|---------------|---------------|
|             |           |         |                | [0,0.7]           | [0.7,1.4]      | [1.4,2]        | [2,2.7]        | [2.7,3.4]      | [3.4,4.1]      | [4.1,4.8]     | [4.8,5.5]     | [5.5,6.2]     | [6.2,6.9]     |
| 75bp SE     | Full gene | 110     | Karp           | 110.6 (113.4)     | 224.3 (142.9)  | 181 (73.5)     | 206.8 (84.7)   | 148.6 (28.3)   | 132.6 (16.7)   | 119.7 (9.1)   | 118.4 (10)    | 96 (10.8)     | 82 (6.9)      |
|             |           |         | Karp-Collapse  | 107 (112.6)       | 215.7 (137.3)  | 165.3 (69.9)   | 198.8 (83.6)   | 132.9 (18.9)   | 126.9 (15.5)   | 113.5 (8.1)   | 112.2 (11.7)  | 93.9 (11.1)   | 77.1 (7)      |
|             |           |         | UCLUST         | 279.5 (218)       | 467.2 (256.4)  | 390 (176.4)    | 388.7 (166.9)  | 293.5 (51.2)   | 265.6 (33)     | 233.4 (17.7)  | 216.2 (23.1)  | 167.6 (18.3)  | 132.7 (11.7)  |
|             |           |         | SortMeRNA      | 254.4 (195.7)     | 467.4 (273.8)  | 377.2 (179.3)  | 391.3 (149.9)  | 308.9 (52.1)   | 292.3 (35)     | 263.7 (17.9)  | 247.5 (24.2)  | 198.4 (21)    | 190 (114.3)   |
|             |           |         | Kallisto       | 271.7 (167.3)     | 415.9 (182.5)  | 354.8 (124)    | 366.2 (125.1)  | 290.2 (31.1)   | 260.1 (20.5)   | 224.5 (10.9)  | 208.9 (17.6)  | 166.6 (18.6)  | 140.6 (12.1)  |
|             |           |         | USEARCH61      | 287.7 (224.9)     | 497.8 (276.8)  | 399.7 (179.8)  | 402.7 (170.3)  | 306.5 (45.7)   | 282.6 (30.5)   | 244.7 (17.8)  | 227.2 (24.5)  | 175.1 (21.3)  | 138.3 (12.4)  |
|             |           |         | Mothur NB      | 327.3 (341.2)     | 433.9 (261.7)  | 433.9 (199.8)  | 510.9 (181.8)  | 392.8 (110.9)  | 416.4 (99.2)   | 405.4 (50.3)  | 404.8 (40.2)  | 382.7 (49.5)  | 382.5 (34)    |
|             |           |         | 16S Classifier | 1992.7 (44.6)     | 1941.3 (106.7) | 1866.6 (267.6) | 1946.1 (108.2) | 1843.5 (148.6) | 1912.7 (68.7)  | 1846.3 (57.8) | 1834.4 (57.1) | 1837.6 (57.9) | 1853.3 (57.3) |
|             |           |         | SINTAX         | 98.1 (99.2)       | 269.1 (177.0)  | 238.0 (100.9)  | 368.7 (140.5)  | 257.9 (53.1)   | 250.5 (43.5)   | 247.1 (26.8)  | 278.4 (21.1)  | 253.1 (22.3)  | 252.9 (10.2)  |
|             | V4        | 130     | Karp           | 40.9 (55.3)       | 86.7 (92.1)    | 96.5 (63.2)    | 79.1 (23.1)    | 72 (25.3)      | 63.4 (14.4)    | 63.9 (15.4)   | 58.1 (4.4)    | 46.8 (5.6)    | 38.8 (2.7)    |
|             |           |         | Karp-Collapse  | 165.2 (270.1)     | 241.1 (173.6)  | 231 (104.8)    | 199.5 (54)     | 181.9 (40.6)   | 145.9 (27)     | 160.9 (43)    | 130.6 (10.6)  | 103.9 (15.5)  | 74.2 (4.8)    |
|             |           |         | UCLUST         | 130.2 (295.7)     | 166.8 (186.9)  | 157 (97.1)     | 146.3 (78.7)   | 124.5 (50.9)   | 99.4 (26.5)    | 119.5 (49.1)  | 95 (10.3)     | 75.6 (9.7)    | 51.2 (4.6)    |
|             |           |         | SortMeRNA      | 157.1 (341.8)     | 139.6 (167.5)  | 150.6 (101.1)  | 133.6 (61.5)   | 123.6 (49.5)   | 105.2 (22)     | 125.9 (40)    | 110.3 (10)    | 91.3 (14.7)   | 66.7 (5.2)    |
|             |           |         | Kallisto       | 104.1 (80.9)      | 205 (135.8)    | 201 (78.8)     | 180.8 (46.8)   | 165.3 (35.7)   | 144 (18.3)     | 142.4 (25.2)  | 126.6 (11)    | 101.6 (9.5)   | 79.6 (2.2)    |
|             |           |         | USEARCH61      | 149 (300.8)       | 172 (182.2)    | 175.9 (111.8)  | 142.1 (60.7)   | 130.6 (51.2)   | 105.1 (21.6)   | 122.5 (43.8)  | 103.3 (10.2)  | 78.5 (13.3)   | 55.3 (3.6)    |
|             |           |         | Mothur NB      | 311.4 (491.2)     | 404.8 (345.2)  | 498.2 (210.2)  | 399.5 (188.6)  | 397.4 (171.5)  | 423.9 (54)     | 433.3 (63.8)  | 408.8 (41.3)  | 374.4 (50.9)  | 344 (13.1)    |
|             |           |         | 16S Classifier | 1045.6 (710.8)    | 1440.5 (395.3) | 1230.8 (400.5) | 1266.7 (294.5) | 1289.4 (179)   | 1100.4 (149.2) | 1151.3 (98.8) | 1130.1 (64.3) | 1129.6 (61.3) | 1113.8 (19.5) |
|             |           |         | SINTAX         | 60.8 (57.0)       | 86.4 (41.1)    | 163.5 (100.3)  | 194.9 (96.5)   | 185.1 (48.4)   | 178.8 (32.9)   | 200.3 (41.8)  | 185.1 (19.2)  | 166.7 (10.6)  | 163.5 (6.1)   |
| 151bp PE    | Full gene | 130     | Karp           | 2 (3.2)           | 5.3 (7.6)      | 7.4 (10.9)     | 8.4 (9.1)      | 9.3 (5.1)      | 10.4 (7.3)     | 9.4 (3.1)     | 11.1 (2.3)    | 11.7 (2.1)    | 10.5 (0.9)    |
|             |           |         | Karp-Collapse  | 6.3 (3.6)         | 20.8 (22.4)    | 17.8 (13.1)    | 26.8 (25)      | 28.6 (11.7)    | 27.3 (8.8)     | 27 (7.6)      | 24.7 (3.2)    | 23.6 (4.2)    | 22.1 (1.5)    |
|             |           |         | UCLUST         | 3.9 (3.5)         | 19.1 (31.3)    | 27.6 (45.9)    | 26.1 (20.7)    | 28.9 (18.6)    | 25.3 (14.5)    | 21.6 (5.3)    | 24.7 (3.8)    | 27.1 (6)      | 24.1 (2.8)    |
|             |           |         | SortMeRNA      | 7 (9.3)           | 31.2 (39.4)    | 39.1 (50.4)    | 41.2 (30.2)    | 40.9 (26.8)    | 38 (17.9)      | 31.2 (8.8)    | 35.3 (5.8)    | 33.8 (5.4)    | 28.8 (2.1)    |
|             |           |         | Kallisto       | 14.1 (12.1)       | 46.1 (24.1)    | 51.8 (22)      | 70.6 (19.3)    | 76.2 (16.9)    | 71.2 (10.8)    | 74.7 (7.4)    | 72.3 (4.9)    | 71.9 (5)      | 70.4 (2.7)    |
|             |           |         | USEARCH61      | 9.2 (5.2)         | 26.7 (37.6)    | 43.8 (57.7)    | 35.5 (26.9)    | 40.5 (25.5)    | 35.4 (13.3)    | 31.7 (5.6)    | 33.9 (4.6)    | 34.9 (7.3)    | 31.5 (2.2)    |
|             |           |         | Mothur NB      | 135.1 (52.8)      | 168.5 (59.9)   | 207 (108.5)    | 169.8 (72)     | 157.3 (48.2)   | 146.2 (57.7)   | 89.2 (21)     | 83.9 (17.9)   | 76.5 (11.7)   | 59.8 (6.3)    |
|             |           |         | 16S Classifier | 1873.9 (215.5)    | 1821.7 (284.1) | 1821.5 (278.6) | 1799.6 (172.9) | 1675.5 (168.9) | 1663.9 (85.2)  | 1625.2 (83)   | 1666.5 (24.1) | 1645.3 (32.9) | 1646.5 (6.8)  |
|             |           |         | SINTAX         | 9.9 (10.8)        | 51.8 (191.6)   | 36.2 (60.1)    | 45.5 (32.3)    | 42.4 (29.2)    | 34.7 (18.1)    | 30.6 (11.8)   | 29.9 (5.2)    | 32.5 (6.2)    | 28.0 (2.7)    |
|             | V4        | 190     | Karp           | 0.5 (0.9)         | 2.9 (12.9)     | 5.2 (18.4)     | 1.3 (1.5)      | 2.5 (4.3)      | 2.1 (1.5)      | 3.7 (2.5)     | 3 (1)         | 3 (0.7)       | 3.7 (0.8)     |
|             |           |         | Karp-Collapse  | 0.2 (0.7)         | 0.5 (1.6)      | 5.1 (18.7)     | 1 (1.8)        | 2.1 (4.7)      | 1.3 (1.6)      | 1.7 (1.5)     | 2 (1.3)       | 1.6 (1)       | 2.4 (1.1)     |
|             |           |         | UCLUST         | 0.9 (2.4)         | 1.2 (3.1)      | 41.4 (174.9)   | 5.7 (7.5)      | 9.3 (17.7)     | 23.8 (35.5)    | 23.9 (24.8)   | 25.9 (32.4)   | 13.6 (6.3)    | 16.2 (4)      |
|             |           |         | SortMeRNA      | 2.7 (5.8)         | 10.5 (52.9)    | 21.9 (76)      | 17.2 (30)      | 10.1 (17.8)    | 31.2 (46.9)    | 30.4 (22.9)   | 39.5 (32.2)   | 35.1 (12.7)   | 30.6 (5.8)    |
|             |           |         | Kallisto       | 14.9 (16.9)       | 28.4 (23)      | 54 (26.4)      | 58.7 (15.6)    | 53.6 (11.7)    | 61.2 (11.1)    | 66 (8.2)      | 60.9 (6.8)    | 59.4 (5.2)    | 59.2 (2.2)    |
|             |           |         | USEARCH61      | 38.5 (227.6)      | 10.3 (53)      | 21.7 (76.1)    | 16.9 (30.2)    | 10.4 (17.2)    | 35.1 (49.3)    | 29.2 (23.1)   | 34.1 (35.3)   | 27.4 (8.9)    | 26.4 (4.8)    |
|             |           |         | Mothur NB      | 192.6 (337.3)     | 212.8 (171.7)  | 288.2 (267)    | 310.4 (201)    | 319 (88.7)     | 276.7 (53.4)   | 309.4 (35.4)  | 254.1 (36.3)  | 206.5 (18.5)  | 138.2 (12.5)  |
|             |           |         | 16S Classifier | 555.2 (799.3)     | 204.1 (349.5)  | 385.9 (434.3)  | 368.2 (250.2)  | 335.6 (214.1)  | 326.9 (111.0)  | 296.2 (81.7)  | 263.3 (48.9)  | 279.3 (26.2)  | 247.5 (22.7)  |
|             |           |         | SINTAX         | 3.3 (9.4)         | 0.8 (1.9)      | 48.1 (213.0)   | 0.5 (0.7)      | 56.1 (101.6)   | 17.8 (30.4)    | 9.6 (9.9)     | 16.9 (11.4)   | 9.7 (6.1)     | 13.5 (3.4)    |

SE=Single-end, PE=Paired-end

Table 8: Per family error rates, 1,000,000 reads

| Read Length | Region    | Samples | Method         | Shannon Diversity |                |                |                |                |                |                |               |               |               |         |
|-------------|-----------|---------|----------------|-------------------|----------------|----------------|----------------|----------------|----------------|----------------|---------------|---------------|---------------|---------|
|             |           |         |                | [0,0.7]           | [0.7,1.4]      | [1.4,2]        | [2,2.7]        | [2.7,3.4]      | [3.4,4.1]      | [4.1,4.8]      | [4.8,5.5]     | [5.5,6.2]     | [6.2,6.9]     |         |
| 301bp PE    | Full gene | 170     | Karp           | 7.2 (20.6)        | 5.3 (11.1)     | 9.2 (15.8)     | 11.7 (15.3)    | 11 (14.6)      | 12.6 (6)       | 12.2 (2.6)     | 14.4 (4.3)    | 15.9 (2.5)    | 17.3 (1.3)    |         |
|             |           |         | Karp-Collapse  | 8.7 (11)          | 7.3 (5.1)      | 8.6 (4)        | 13.1 (13.5)    | 12.2 (13.2)    | 16.3 (16.5)    | 10.6 (2.9)     | 10.8 (1.7)    | 12.1 (2.4)    | 11.7 (2.1)    |         |
|             |           |         | UCLUST         | 16.1 (54.8)       | 3.7 (8.1)      | 7.9 (18.9)     | 2.6 (6.1)      | 5.4 (7.4)      | 7 (8.8)        | 9.1 (9.7)      | 9.5 (4)       | 7.9 (2.6)     | 9.6 (2.7)     |         |
|             |           |         | SortMeRNA      | 9.6 (22.9)        | 16.6 (29.9)    | 16.8 (25.6)    | 12.2 (16.1)    | 19.9 (19.6)    | 20.6 (15.5)    | 18.4 (7.8)     | 23 (8.2)      | 16.2 (4.5)    | 16.3 (2.6)    |         |
|             |           |         | Kallisto       | 448.6 (375.8)     | 796.4 (302)    | 908.1 (253.8)  | 981.1 (252.7)  | 1053.6 (128.8) | 1037.5 (123.2) | 1067.3 (108.7) | 1039 (56.3)   | 1055.4 (31)   | 1008.5 (23.7) |         |
|             |           |         | USEARCH61      | 10 (40.1)         | 4.8 (10.7)     | 12.8 (30.4)    | 6.8 (13.2)     | 10.6 (14.4)    | 13.3 (15)      | 10.3 (11.6)    | 12.3 (9)      | 11.1 (4.3)    | 12.1 (2.1)    |         |
|             |           |         | Mothur NB      | NA (NA)           | NA (NA)        | NA (NA)        | NA (NA)        | NA (NA)        | NA (NA)        | NA (NA)        | NA (NA)       | NA (NA)       | NA (NA)       | NA (NA) |
|             |           |         | 16S Classifier | 1545.3 (609.4)    | 1550.6 (460.4) | 1602.6 (296.6) | 1502.9 (266.1) | 1534.1 (148.4) | 1506 (113.6)   | 1507.8 (43.9)  | 1431.6 (69.8) | 1419.6 (31.1) | 1404.9 (13.7) |         |
|             |           |         | SINTAX         | 4.9 (13.0)        | 10.1 (20.7)    | 12.9 (25.0)    | 10.9 (23.8)    | 19.9 (19.9)    | 18.8 (15.2)    | 17.3 (10.0)    | 22.3 (6.5)    | 16.7 (4.7)    | 18.1 (3.2)    |         |
|             | V4        | 190     | Karp           | 10.4 (53.9)       | 2.8 (2.7)      | 6.9 (8.3)      | 28.2 (46.2)    | 8.5 (7.8)      | 6.3 (2.8)      | 6.5 (2.2)      | 8.1 (4.2)     | 7 (1.4)       | 6.7 (1.1)     |         |
|             |           |         | Karp-Collapse  | 0.7 (3.2)         | 0.3 (0.7)      | 0.3 (0.6)      | 5.4 (16.3)     | 0.4 (0.4)      | 0.4 (0.2)      | 0.4 (0.2)      | 0.5 (0.1)     | 0.6 (0.4)     | 0.4 (0.1)     |         |
|             |           |         | UCLUST         | 0.1 (0.6)         | 0.4 (2.6)      | 9.9 (62.6)     | <0.1 (<0.1)    | <0.1 (<0.1)    | 0.2 (0.4)      | 0.6 (0.9)      | 0.4 (0.5)     | 1.4 (1.4)     | 2.8 (3.1)     |         |
|             |           |         | SortMeRNA      | 0.9 (3.3)         | 0.3 (0.9)      | 1.2 (5.7)      | 29.9 (91.3)    | 15.7 (47.6)    | 9.6 (28)       | 4.6 (6.3)      | 4.3 (4.8)     | 3.9 (3.2)     | 3.5 (2.4)     |         |
|             |           |         | Kallisto       | 238.4 (274)       | 536.3 (426.2)  | 774.3 (317.3)  | 989.2 (211.7)  | 958.5 (207.2)  | 1032.7 (110.9) | 997.7 (142.1)  | 975.5 (82.1)  | 978.7 (58.5)  | 968.1 (25)    |         |
|             |           |         | USEARCH61      | <0.1 (0.1)        | <0.1 (<0.1)    | <0.1 (<0.1)    | 0.1 (0.3)      | 4.1 (13)       | 4.9 (14.9)     | 2.8 (8.5)      | 1.1 (2)       | 3.8 (4.1)     | 3.2 (2.2)     |         |
|             |           |         | Mothur NB      | 325.2 (516.6)     | 196.8 (80.5)   | 364.2 (291)    | 298.3 (117.3)  | 313.7 (56.7)   | 260.9 (54.5)   | 265.5 (29.4)   | 238.3 (21.4)  | 212.7 (24)    | 147.6 (11.7)  |         |
|             |           |         | 16S Classifier | 281.0 (555.8)     | 325.1 (528.0)  | 345.1 (342.8)  | 395.3 (304.7)  | 245.2 (163.2)  | 311.6 (118.9)  | 299.0 (82.9)   | 271.8 (56.3)  | 264.8 (34.6)  | 255.0 (18.2)  |         |
|             |           |         | SINTAX         | 0.6 (2.3)         | 39.6 (122.7)   | 1.0 (2.8)      | 0.4 (0.7)      | 26.1 (61.2)    | 11.9 (35.2)    | 9.4 (14.6)     | 13.9 (8.2)    | 14.7 (12.6)   | 10.0 (3.7)    |         |

SE=Single-end, PE=Paired-end

Table 9: Per order error rates, 1,000,000 reads

| Read Length | Region    | Samples | Method         | Shannon Diversity |                |                |                |                |                |                |               |               |               |
|-------------|-----------|---------|----------------|-------------------|----------------|----------------|----------------|----------------|----------------|----------------|---------------|---------------|---------------|
|             |           |         |                | [0,0.7]           | [0.7,1.4]      | [1.4,2]        | [2,2.7]        | [2.7,3.4]      | [3.4,4.1]      | [4.1,4.8]      | [4.8,5.5]     | [5.5,6.2]     | [6.2,6.9]     |
| 75bp SE     | Full gene | 110     | Karp           | 64.3 (48)         | 99.4 (57.8)    | 122.2 (51.2)   | 124.4 (43.9)   | 97.8 (14)      | 79 (12.7)      | 64.2 (8.8)     | 64.3 (4.6)    | 56.2 (4.6)    | 49.4 (3.6)    |
|             |           |         | Karp-Collapse  | 63.2 (46.2)       | 93.3 (54.3)    | 117 (52.5)     | 114.4 (38.8)   | 89.5 (13.8)    | 76 (13.1)      | 60.7 (10.2)    | 57.5 (5.8)    | 54.2 (4)      | 44.6 (3)      |
|             |           |         | UCLUST         | 161.7 (93.4)      | 222.9 (116.5)  | 258.1 (117.9)  | 211.1 (89.2)   | 193.1 (36.3)   | 149.8 (30.3)   | 117.2 (15.4)   | 108.4 (11.6)  | 84.1 (7.8)    | 69.2 (7.6)    |
|             |           |         | SortMeRNA      | 164.7 (88.6)      | 223.2 (119.5)  | 251.7 (113.9)  | 218.9 (79.7)   | 213.5 (34.2)   | 171.1 (32.5)   | 144.5 (23.3)   | 131.1 (16.4)  | 106.6 (8.7)   | 106.7 (69.1)  |
|             |           |         | Kallisto       | 194.9 (80.2)      | 256.4 (95.2)   | 269.1 (103)    | 236.3 (69.9)   | 212.5 (29.4)   | 166.9 (15.3)   | 135.3 (15.7)   | 124.9 (13.9)  | 102.3 (7.8)   | 89.8 (9.2)    |
|             |           |         | USEARCH61      | 175 (95.4)        | 246.1 (127)    | 274.9 (123.8)  | 223 (97.4)     | 204.7 (31.5)   | 161.8 (31.8)   | 127.4 (16.3)   | 117.7 (14)    | 91.7 (6.9)    | 74.8 (8.6)    |
|             |           |         | Mothur NB      | 269.2 (309)       | 313.1 (247.7)  | 412.6 (235.6)  | 318.6 (74.9)   | 301.3 (72.2)   | 298.6 (96.1)   | 304 (44.6)     | 282.1 (47.5)  | 279.9 (42.2)  | 289.3 (24.5)  |
|             |           |         | 16S Classifier | 1861.1 (80.4)     | 1661 (240.2)   | 1533.3 (369.8) | 1509.2 (209.8) | 1535.3 (232.4) | 1438 (136.6)   | 1351 (102.1)   | 1332.7 (83.4) | 1317.6 (70.8) | 1357.9 (54.4) |
|             |           |         | SINTAX         | 44.2 (28.5)       | 131.4 (63.8)   | 209.3 (107.3)  | 229.0 (89.1)   | 212.7 (42.6)   | 187.0 (36.5)   | 202.1 (23.9)   | 210.8 (11.4)  | 199.2 (15.2)  | 204.1 (9.0)   |
|             | V4        | 130     | Karp           | 34.2 (51.4)       | 60.5 (74.3)    | 61.8 (46)      | 61.5 (25.2)    | 50.3 (14.4)    | 52.3 (12.5)    | 48.6 (13.7)    | 43.3 (9.2)    | 37 (5.1)      | 33.5 (1.7)    |
|             |           |         | Karp-Collapse  | 166.9 (273.6)     | 176.7 (116.8)  | 159.8 (91.7)   | 135.9 (54.2)   | 125.3 (37.6)   | 104.3 (25.9)   | 102.5 (40.4)   | 83.7 (10.4)   | 68.9 (7.7)    | 51 (3.9)      |
|             |           |         | UCLUST         | 124 (307.2)       | 99.1 (138.9)   | 87.7 (83.7)    | 66 (53.3)      | 59.8 (28.4)    | 50.4 (12.3)    | 57.3 (42.1)    | 46.3 (4.4)    | 37.5 (4.5)    | 28.5 (3.7)    |
|             |           |         | SortMeRNA      | 143.8 (344.9)     | 82.6 (104.6)   | 80 (67.4)      | 68.6 (49)      | 72.2 (27.1)    | 66.4 (15.7)    | 72.6 (35.2)    | 62.6 (4.2)    | 59.3 (7.6)    | 49.9 (4.2)    |
|             |           |         | Kallisto       | 99.2 (84.1)       | 165.2 (117.8)  | 159.9 (87.7)   | 130.7 (46.1)   | 118.7 (34.4)   | 114 (18.1)     | 111.9 (19.8)   | 100.9 (6)     | 85.3 (6.2)    | 74.6 (1.5)    |
|             |           |         | USEARCH61      | 133.4 (310.3)     | 104 (138.3)    | 99 (94.2)      | 71.9 (57.2)    | 67.4 (30.2)    | 57.1 (13.3)    | 60.5 (34.2)    | 54.1 (5.9)    | 42.7 (6.2)    | 32.7 (3.7)    |
|             |           |         | Mothur NB      | 372.8 (484.3)     | 369.9 (277.3)  | 487.4 (250.4)  | 435.3 (81)     | 415.5 (129.2)  | 462.6 (134.4)  | 410.9 (46.2)   | 393.5 (45.5)  | 356.1 (43.7)  | 333.2 (11)    |
|             |           |         | 16S Classifier | 1374 (578.8)      | 1459.5 (400.8) | 1277.8 (381.3) | 1155.3 (265)   | 1164.7 (216.7) | 1140.2 (113.3) | 1060.4 (85.6)  | 1068 (118.3)  | 1038.7 (50.7) | 1023.9 (23.6) |
|             |           |         | SINTAX         | 62.6 (64.7)       | 115.3 (67.7)   | 180.3 (151.7)  | 174.7 (92.1)   | 159.3 (51.1)   | 159.3 (27.2)   | 173.7 (43.7)   | 173.6 (16.8)  | 166.1 (15.4)  | 165.0 (5.1)   |
| 151bp PE    | Full gene | 130     | Karp           | 1.4 (2)           | 5.2 (7.6)      | 6 (9.9)        | 4.6 (2.8)      | 8.1 (4.9)      | 8.8 (7)        | 7.5 (2.8)      | 8.5 (1.6)     | 8.4 (1.6)     | 7.1 (0.8)     |
|             |           |         | Karp-Collapse  | 5.9 (3.9)         | 18.7 (21.2)    | 16 (11.6)      | 16.6 (7.7)     | 25.7 (11)      | 22.7 (7.2)     | 21.7 (6.3)     | 18.1 (3.6)    | 15.7 (3.3)    | 13.9 (1)      |
|             |           |         | UCLUST         | 3.1 (3.7)         | 15.4 (29.5)    | 9.8 (12.4)     | 18.4 (14)      | 16 (5.4)       | 16.3 (12.9)    | 15.9 (5.2)     | 14.2 (3.9)    | 13.9 (4.2)    | 13.2 (1.1)    |
|             |           |         | SortMeRNA      | 3.5 (3.7)         | 27.2 (59.5)    | 15.6 (16.1)    | 24.1 (23.3)    | 26.9 (19.6)    | 17.7 (7.1)     | 18.1 (6.6)     | 18.7 (3)      | 17.1 (3.2)    | 15 (1.3)      |
|             |           |         | Kallisto       | 14 (12.1)         | 45.8 (24.5)    | 49.4 (23.4)    | 69.6 (20.2)    | 74.6 (17.6)    | 68.5 (11.4)    | 69.4 (8.7)     | 68.4 (5.5)    | 68 (5)        | 67.3 (3.3)    |
|             |           |         | USEARCH61      | 8.6 (5)           | 20.3 (35.5)    | 19.3 (25.8)    | 17.8 (5.3)     | 30.7 (16.3)    | 25.9 (11)      | 22.5 (7.4)     | 21.7 (4.8)    | 19.3 (5.6)    | 16.9 (2.4)    |
|             |           |         | Mothur NB      | 124.1 (49)        | 158.7 (38.5)   | 181.6 (100.1)  | 138 (61.4)     | 124.3 (26.8)   | 101.7 (63.1)   | 56.6 (11.6)    | 45.6 (10.5)   | 38 (7.4)      | 31.2 (3.9)    |
|             |           |         | 16S Classifier | 1463.4 (501.1)    | 1595.9 (330.7) | 1315.6 (343.1) | 1423.4 (275.3) | 1179 (270)     | 1280.7 (169.5) | 1260.5 (117.9) | 1250.6 (54.6) | 1189.3 (50.9) | 1206.5 (20.7) |
|             |           |         | SINTAX         | 4.6 (5.5)         | 48.2 (190.4)   | 10.7 (16.3)    | 19.9 (21.2)    | 22.5 (23.0)    | 12.9 (12.4)    | 15.0 (6.7)     | 11.5 (3.0)    | 11.8 (3.0)    | 11.7 (1.2)    |
|             | V4        | 190     | Karp           | 0.5 (0.9)         | 3.1 (13.5)     | 5.4 (18.7)     | 1.4 (1.5)      | 2.6 (4.3)      | 2.2 (1.8)      | 3.8 (2.2)      | 2.8 (1.1)     | 2.9 (1.1)     | 3.4 (0.9)     |
|             |           |         | Karp-Collapse  | 0.1 (0.3)         | 0.5 (1.5)      | 5.3 (19)       | 1.1 (1.8)      | 2.1 (4.7)      | 1.2 (1.6)      | 1.6 (1.4)      | 1.8 (1.2)     | 1.4 (0.9)     | 2.1 (1)       |
|             |           |         | UCLUST         | 2.6 (6.8)         | 19.6 (84.2)    | 51 (177.6)     | 5.9 (7.5)      | 22.4 (37.7)    | 33.6 (38)      | 29.4 (19.3)    | 27.8 (26.4)   | 20.9 (10.4)   | 17.7 (3.2)    |
|             |           |         | SortMeRNA      | 4.3 (8.2)         | 28.9 (98.2)    | 31.7 (84.5)    | 15.2 (23.7)    | 29.1 (38.9)    | 41.8 (46.9)    | 35.4 (16.8)    | 39.9 (28.2)   | 35.5 (8.5)    | 28.8 (4.5)    |
|             |           |         | Kallisto       | 21.5 (19.7)       | 51.5 (37.4)    | 62.9 (28.2)    | 67.3 (13.6)    | 70.1 (16.5)    | 80 (13.8)      | 78.6 (9.2)     | 71.9 (5.9)    | 70.5 (3.6)    | 72.4 (2.6)    |
|             |           |         | USEARCH61      | 4.1 (8.1)         | 28.9 (98.2)    | 31.4 (84.6)    | 15 (23.9)      | 29.1 (38.8)    | 41.7 (47.2)    | 34.6 (17.4)    | 36.3 (29.4)   | 29.6 (8.3)    | 25.4 (3.4)    |
|             |           |         | Mothur NB      | 186.7 (338)       | 220 (308.9)    | 188 (240.4)    | 277.6 (219.4)  | 335.7 (140.9)  | 252.4 (63.6)   | 262.4 (49.6)   | 203.5 (24.8)  | 148.6 (14)    | 93.4 (10.6)   |
|             |           |         | 16S Classifier | 421.7 (719.2)     | 128.1 (296)    | 179.8 (298.2)  | 347 (246.2)    | 259.3 (229.1)  | 299 (110.6)    | 195.2 (56.1)   | 231.5 (55.5)  | 239.6 (34.2)  | 219.7 (17.2)  |
|             |           |         | SINTAX         | 0.2 (0.4)         | 0.1 (0.3)      | 47.9 (213.3)   | 0.3 (0.5)      | 22.3 (69.3)    | 1.7 (1.9)      | 4.4 (7.1)      | 6.6 (10.2)    | 3.2 (1.6)     | 5.4 (3.3)     |

SE=Single-end, PE=Paired-end

Table 10: Per order error rates, 1,000,000 reads

| Read Length | Region    | Samples | Method         | Shannon Diversity |               |                |                |                |                |                |               |               |               |
|-------------|-----------|---------|----------------|-------------------|---------------|----------------|----------------|----------------|----------------|----------------|---------------|---------------|---------------|
|             |           |         |                | [0,0.7]           | [0.7,1.4]     | [1.4,2]        | [2,2.7]        | [2.7,3.4]      | [3.4,4.1]      | [4.1,4.8]      | [4.8,5.5]     | [5.5,6.2]     | [6.2,6.9]     |
| 301bp PE    | Full gene | 170     | Karp           | 2.5 (4)           | 5.1 (11.1)    | 4 (4.6)        | 10.2 (14.5)    | 6.8 (5.1)      | 10.3 (7.2)     | 9.1 (2.2)      | 9.5 (3)       | 10.6 (2.4)    | 10 (0.6)      |
|             |           |         | Karp-Collapse  | 7.7 (9.4)         | 7 (5.2)       | 7.7 (3.7)      | 12.4 (13.3)    | 8.2 (3.3)      | 13.9 (16.6)    | 8.4 (3.1)      | 7.9 (1.3)     | 9.2 (3.5)     | 7.8 (1.2)     |
|             |           |         | UCLUST         | 0.6 (0.6)         | 3.1 (7.2)     | 3.6 (10)       | 0.7 (0.7)      | 1.7 (3.9)      | 0.6 (0.5)      | 3.5 (6.8)      | 4.3 (4.3)     | 2.7 (1.9)     | 3.3 (0.9)     |
|             |           |         | SortMeRNA      | 1.9 (4.2)         | 14.5 (29.2)   | 9.8 (20.1)     | 6.4 (14)       | 7.7 (9)        | 10 (13.1)      | 8.1 (5.3)      | 11.9 (9.8)    | 8 (4)         | 6.9 (1.5)     |
|             |           |         | Kallisto       | 424.4 (355.2)     | 778.8 (311.9) | 883.6 (263.2)  | 972.5 (260)    | 1034.9 (139.8) | 1022.5 (125.7) | 1028.7 (118)   | 982 (63.5)    | 1006.9 (44.8) | 961.9 (28.8)  |
|             |           |         | USEARCH61      | 0.4 (0.4)         | 3.8 (10.5)    | 3.4 (12.7)     | 5.1 (12.5)     | 3.7 (4.1)      | 8 (14.6)       | 7.1 (11.3)     | 6.4 (7.6)     | 5.3 (3.9)     | 4.8 (2)       |
|             |           |         | Mothur NB      | NA (NA)           | NA (NA)       | NA (NA)        | NA (NA)        | NA (NA)        | NA (NA)        | NA (NA)        | NA (NA)       | NA (NA)       | NA (NA)       |
|             |           |         | 16S Classifier | 1450.8 (557.7)    | 1246 (555.4)  | 1445.1 (305.4) | 1268.7 (292.5) | 1244.6 (190.6) | 1218.4 (169.2) | 1162.5 (110.2) | 1070.7 (139)  | 1103.1 (60.3) | 1090.2 (14)   |
|             |           |         | SINTAX         | 0.5 (1.1)         | 8.5 (20.4)    | 6.1 (15.1)     | 3.4 (5.9)      | 7.9 (9.5)      | 7.3 (13.0)     | 5.8 (7.3)      | 10.1 (7.9)    | 6.0 (2.4)     | 6.7 (1.5)     |
|             | V4        | 190     | Karp           | 10.8 (54)         | 6 (11.3)      | 8.4 (8.9)      | 29.5 (49)      | 8.6 (7.8)      | 7 (3.9)        | 6.3 (1.9)      | 7.4 (3.5)     | 6.5 (1.4)     | 5.5 (1)       |
|             |           |         | Karp-Collapse  | 0.3 (1.9)         | 0.3 (0.9)     | 0.3 (0.5)      | 5.8 (17.6)     | 0.4 (0.4)      | 0.4 (0.3)      | 0.3 (0.2)      | 0.3 (0.1)     | 0.4 (0.2)     | 0.3 (0.1)     |
|             |           |         | UCLUST         | <0.1 (<0.1)       | 0.4 (2.6)     | 14.1 (89.3)    | <0.1 (<0.1)    | <0.1 (<0.1)    | 0.1 (0.4)      | 0.2 (0.7)      | <0.1 (<0.1)   | 0.1 (0.4)     | 0.9 (1.6)     |
|             |           |         | SortMeRNA      | 0.1 (0.1)         | 0.1 (0.2)     | 0.1 (<0.1)     | 32 (99.7)      | 15.3 (47.7)    | 9.2 (28.1)     | 0.8 (1)        | 1.8 (3.3)     | 0.9 (1.1)     | 1.6 (1.2)     |
|             |           |         | Kallisto       | 433.9 (358)       | 829.3 (396.8) | 942.4 (299.1)  | 1117.8 (212.9) | 1226.9 (192.2) | 1186.1 (114.5) | 1199.5 (107.4) | 1171.1 (76.2) | 1129.7 (72.7) | 1159.8 (28.7) |
|             |           |         | USEARCH61      | <0.1 (<0.1)       | <0.1 (<0.1)   | <0.1 (<0.1)    | 0.1 (0.3)      | <0.1 (<0.1)    | 4.7 (14.9)     | 2.7 (8.5)      | <0.1 (<0.1)   | 0.7 (2.1)     | 1.4 (1.8)     |
|             |           |         | Mothur NB      | 453.4 (590.8)     | 268 (140.8)   | 321.1 (250.6)  | 267.8 (116.2)  | 211.2 (70.8)   | 230.8 (56.7)   | 181.6 (16.7)   | 157.2 (22.9)  | 145.4 (22.5)  | 84.9 (12.9)   |
|             |           |         | 16S Classifier | 264.4 (624.3)     | 141.4 (361.1) | 182.8 (297.6)  | 155.1 (194.5)  | 163.1 (99.7)   | 212.9 (80.2)   | 201.3 (79)     | 214.3 (45.4)  | 211.3 (54.8)  | 203.6 (11.2)  |
|             |           |         | SINTAX         | <0.1 (0.2)        | <0.1 (0.1)    | 28.2 (126.3)   | 0.3 (0.5)      | 20.6 (61.1)    | 11.2 (35.4)    | 3.0 (7.3)      | 1.9 (3.0)     | 1.7 (2.4)     | 3.4 (2.3)     |

SE=Single-end, PE=Paired-end

Table 11: Per class error rates, 1,000,000 reads

| Read Length | Region    | Samples | Method         | Shannon Diversity |                |                |                |                |                |                |               |               |               |
|-------------|-----------|---------|----------------|-------------------|----------------|----------------|----------------|----------------|----------------|----------------|---------------|---------------|---------------|
|             |           |         |                | [0,0.7)           | [0.7,1.4)      | [1.4,2)        | [2,2.7)        | [2.7,3.4)      | [3.4,4.1)      | [4.1,4.8)      | [4.8,5.5)     | [5.5,6.2)     | [6.2,6.9]     |
| 75bp SE     | Full gene | 110     | Karp           | 44.5 (22.4)       | 51 (18.5)      | 60.1 (27.4)    | 71.6 (22.5)    | 46.5 (11)      | 44.4 (11.5)    | 36.7 (5.4)     | 38.4 (4)      | 35.5 (3.6)    | 34.8 (2.7)    |
|             |           |         | Karp-Collapse  | 44 (23.4)         | 48.2 (16.7)    | 62.4 (26.2)    | 60.8 (15.8)    | 40.5 (12.1)    | 41.3 (11.2)    | 33.6 (5.2)     | 33.8 (4.2)    | 31.6 (3)      | 29.2 (2.1)    |
|             |           |         | UCLUST         | 109.1 (46.6)      | 121.5 (50.7)   | 124.2 (60.1)   | 94.5 (39)      | 82.4 (16.3)    | 70.1 (16.9)    | 53.8 (8)       | 50.1 (8.5)    | 39.2 (3.9)    | 34.5 (5.5)    |
|             |           |         | SortMeRNA      | 119.1 (58.1)      | 127 (56.6)     | 123.5 (49.7)   | 107.1 (40.6)   | 102.5 (18.7)   | 90.3 (26.9)    | 76.6 (11.1)    | 68.7 (12.2)   | 57.1 (5.5)    | 62.6 (43.4)   |
|             |           |         | Kallisto       | 161.9 (48.5)      | 160.1 (41.8)   | 150.8 (50.5)   | 147.2 (43.5)   | 113.4 (21)     | 99.9 (16.7)    | 83.2 (10.3)    | 79.1 (7.5)    | 67.7 (5.9)    | 64.8 (7.5)    |
|             |           |         | USEARCH61      | 118.2 (48.3)      | 136.9 (63.9)   | 132.7 (59.4)   | 99.7 (40.5)    | 91.3 (19.7)    | 78.7 (17.2)    | 60.7 (10.9)    | 57.1 (9.8)    | 46.9 (4.9)    | 41.1 (6.2)    |
|             |           |         | Mothur NB      | 271 (288.5)       | 256.4 (208.2)  | 228.4 (119.4)  | 196 (78)       | 215.3 (62)     | 231.4 (101.4)  | 233.8 (39)     | 221.7 (45)    | 217.7 (40.9)  | 229.2 (26.9)  |
|             |           |         | 16S Classifier | 1804.8 (125.8)    | 1479.4 (314.9) | 1336 (450.7)   | 1339.5 (294.4) | 1292.2 (290.4) | 1177.6 (177.8) | 1156.4 (112.3) | 1092.8 (91.3) | 1112.8 (71.6) | 1155.5 (52.3) |
|             |           |         | SINTAX         | 33.7 (26.3)       | 91.8 (40.9)    | 104.6 (35.6)   | 100.0 (29.3)   | 86.9 (35.9)    | 97.4 (21.7)    | 94.3 (17.1)    | 92.1 (10.7)   | 81.7 (14.7)   | 85.8 (6.4)    |
|             | V4        | 130     | Karp           | 25.7 (31.4)       | 26 (18.8)      | 30.1 (20)      | 44.6 (12.5)    | 34.1 (9.7)     | 38.1 (9.9)     | 32.8 (4)       | 31.8 (7)      | 26.9 (3.9)    | 26.4 (1.9)    |
|             |           |         | Karp-Collapse  | 136.3 (203.8)     | 86.1 (63.9)    | 85.8 (23.8)    | 78.7 (27.5)    | 67.1 (20.1)    | 59.7 (16.1)    | 47.4 (4.9)     | 44.4 (11.7)   | 37.7 (4.7)    | 29.2 (2.9)    |
|             |           |         | UCLUST         | 76.9 (194)        | 26.8 (42.8)    | 26.4 (11.4)    | 26 (12.7)      | 23 (6.8)       | 20.9 (4.7)     | 17.4 (4.5)     | 16 (4.3)      | 13.4 (1.9)    | 11.5 (1.5)    |
|             |           |         | SortMeRNA      | 107.8 (282.9)     | 28.5 (35.4)    | 33.2 (14.7)    | 32.6 (12.4)    | 37.2 (10.1)    | 38.7 (9.8)     | 33.8 (6)       | 33.3 (5.3)    | 36.3 (5.7)    | 30.7 (2.2)    |
|             |           |         | Kallisto       | 78.3 (61.8)       | 82.8 (48.3)    | 91.5 (27.3)    | 81.3 (23.4)    | 75.7 (13.6)    | 76.1 (13.3)    | 74.7 (6.7)     | 69.3 (8)      | 64 (5.1)      | 62 (1.9)      |
|             |           |         | USEARCH61      | 94.9 (240.5)      | 29.9 (41.6)    | 33.7 (24.5)    | 30.4 (12.4)    | 25.5 (8.8)     | 21.5 (6.1)     | 18.3 (4.7)     | 19.2 (4)      | 16.4 (2.9)    | 12.7 (1.9)    |
|             |           |         | Mothur NB      | 331.1 (341.6)     | 279.9 (208.2)  | 328.4 (165.6)  | 353.7 (95.6)   | 318 (72.7)     | 345.9 (81.7)   | 324.9 (60.2)   | 339.4 (29.5)  | 332 (25.7)    | 310.7 (10.6)  |
|             |           |         | 16S Classifier | 1339 (559.1)      | 1317.8 (386)   | 1160.2 (344.3) | 1066.2 (243.3) | 1050.8 (202.2) | 1041.2 (99.2)  | 944.7 (77.1)   | 976.5 (115.2) | 950.2 (44.6)  | 931.7 (27.2)  |
|             |           |         | SINTAX         | 69.1 (96.6)       | 77.3 (62.0)    | 72.5 (38.5)    | 87.4 (32.2)    | 67.8 (14.5)    | 64.4 (12.6)    | 61.8 (13.8)    | 66.6 (9.4)    | 67.9 (8.0)    | 63.0 (5.4)    |
| 151bp PE    | Full gene | 130     | Karp           | 1.6 (2.5)         | 4.8 (7.6)      | 5.6 (9.6)      | 3.7 (2.5)      | 6.4 (4)        | 6.7 (5.9)      | 5.4 (2.7)      | 5.8 (1.4)     | 6 (1.4)       | 5 (0.5)       |
|             |           |         | Karp-Collapse  | 4.9 (3.5)         | 17.9 (21.2)    | 15.4 (11.3)    | 14.8 (8.2)     | 17.1 (5.9)     | 19.7 (6.5)     | 16.3 (6.2)     | 14 (3)        | 10.1 (1.9)    | 9.3 (0.8)     |
|             |           |         | UCLUST         | 1.9 (1.7)         | 3.8 (6.5)      | 4.4 (5.1)      | 9.9 (3.8)      | 10.1 (4.1)     | 9 (1.8)        | 9.2 (2.6)      | 7.7 (1.1)     | 6.9 (1)       | 7.1 (0.8)     |
|             |           |         | SortMeRNA      | 2.1 (1.4)         | 3.9 (3.3)      | 5.6 (3.7)      | 9.1 (3.4)      | 10.3 (4.1)     | 11.3 (6.5)     | 9.7 (2.2)      | 9.5 (2.8)     | 9.2 (1)       | 8.5 (0.9)     |
|             |           |         | Kallisto       | 14 (12.1)         | 45.5 (24.6)    | 48.4 (23.6)    | 67.4 (21.5)    | 69.5 (16.1)    | 63.6 (14.2)    | 62.1 (8.1)     | 63.7 (6.2)    | 61.3 (4.2)    | 62.1 (2.6)    |
|             |           |         | USEARCH61      | 7.5 (4.6)         | 12.1 (30.6)    | 10.5 (9.3)     | 15.8 (5.6)     | 20.2 (4.8)     | 18.8 (7.7)     | 13.5 (3.8)     | 12.2 (2.3)    | 11.3 (1.9)    | 9.5 (1.5)     |
|             |           |         | Mothur NB      | 123.4 (49.5)      | 148.7 (32.1)   | 132 (34.7)     | 129 (66)       | 94.4 (25.9)    | 80.6 (52.7)    | 34.2 (10)      | 25.7 (4.1)    | 18.7 (3.9)    | 14.1 (1.9)    |
|             |           |         | 16S Classifier | 1378.1 (455)      | 1479.9 (322.6) | 1194.7 (367.4) | 1250.5 (299.2) | 1000.7 (262.9) | 1111.1 (163.7) | 1092.7 (99.3)  | 1082.8 (43.8) | 1033.2 (49.4) | 1042.6 (22.1) |
|             |           |         | SINTAX         | 1.0 (1.6)         | 35.7 (190.9)   | 1.9 (1.8)      | 2.6 (1.0)      | 2.3 (1.0)      | 2.3 (0.7)      | 3.8 (1.9)      | 2.3 (0.4)     | 2.4 (0.8)     | 2.2 (0.4)     |
|             | V4        | 190     | Karp           | 0.5 (0.9)         | 3.1 (13.5)     | 5.4 (18.7)     | 1.3 (1.5)      | 2.4 (4.3)      | 1.9 (1.8)      | 3.3 (2.1)      | 2.3 (1)       | 2.4 (1.2)     | 2.7 (0.9)     |
|             |           |         | Karp-Collapse  | 0.1 (0.3)         | 0.5 (1.5)      | 5.2 (19)       | 1 (1.8)        | 2 (4.6)        | 1.1 (1.5)      | 1.4 (1.3)      | 1.6 (1.1)     | 1.3 (0.8)     | 2 (1)         |
|             |           |         | UCLUST         | 2.4 (6.7)         | 19.6 (84.2)    | 23.3 (67.7)    | 5.6 (7.3)      | 21.9 (37.3)    | 31.6 (36.9)    | 27.6 (19.2)    | 24.2 (20.9)   | 18.2 (8.5)    | 14.8 (3.2)    |
|             |           |         | SortMeRNA      | 4 (8.2)           | 28.9 (98.2)    | 30 (78.7)      | 12.9 (17.5)    | 28.5 (38.6)    | 39.6 (45.5)    | 32.7 (17.2)    | 32.8 (22)     | 29.6 (5.9)    | 24.6 (5.6)    |
|             |           |         | Kallisto       | 21.3 (19.8)       | 51 (37.6)      | 61.2 (27.7)    | 63.4 (16.7)    | 67.7 (16.2)    | 74.9 (12)      | 74.1 (9.3)     | 67.5 (5.9)    | 66 (3.5)      | 68.3 (1.9)    |
|             |           |         | USEARCH61      | 3.9 (8.2)         | 28.9 (98.3)    | 29.6 (78.8)    | 12.8 (17.6)    | 28.6 (38.6)    | 38.9 (46)      | 32.1 (17.6)    | 31.1 (21.8)   | 23.8 (6.5)    | 21.6 (4.5)    |
|             |           |         | Mothur NB      | 99.6 (28)         | 152.7 (170.3)  | 168.6 (244.7)  | 224.2 (180.7)  | 235.9 (89.6)   | 196.8 (56.9)   | 186.7 (39.9)   | 137.4 (28.9)  | 95.1 (17)     | 53.8 (12.8)   |
|             |           |         | 16S Classifier | 299.9 (653.2)     | 117.2 (283.8)  | 83.3 (188.1)   | 285.5 (228.6)  | 229.3 (231.7)  | 178.8 (68)     | 152.1 (49.2)   | 159.3 (47.6)  | 171.7 (31.7)  | 154.8 (20.6)  |
|             |           |         | SINTAX         | <0.1 (0.1)        | 0.1 (0.3)      | 0.1 (0.3)      | <0.1 (0.1)     | 0.3 (0.3)      | 0.7 (0.8)      | 0.9 (1.4)      | 1.4 (2.6)     | 0.7 (0.6)     | 1.7 (1.7)     |

SE=Single-end, PE=Paired-end

Table 12: Per class error rates, 1,000,000 reads

| Read Length | Region    | Samples | Method         | Shannon Diversity |                |                |                |                |                |                |                |               |               |
|-------------|-----------|---------|----------------|-------------------|----------------|----------------|----------------|----------------|----------------|----------------|----------------|---------------|---------------|
|             |           |         |                | [0,0.7]           | [0.7,1.4]      | [1.4,2]        | [2,2.7]        | [2.7,3.4]      | [3.4,4.1]      | [4.1,4.8]      | [4.8,5.5]      | [5.5,6.2]     | [6.2,6.9]     |
| 301bp PE    | Full gene | 170     | Karp           | 2.4 (4)           | 5.4 (11.2)     | 2.9 (2.7)      | 5.8 (7.4)      | 5.1 (4.4)      | 5.1 (1.5)      | 6.4 (1.8)      | 5.8 (1.2)      | 6.7 (1.5)     | 6.1 (1)       |
|             |           |         | Karp-Collapse  | 7.4 (9.5)         | 6.2 (4.5)      | 7.4 (3.8)      | 8.9 (3.9)      | 6.7 (2.2)      | 7.3 (2.4)      | 5.6 (1)        | 5.5 (1)        | 5.1 (1)       | 4.7 (0.3)     |
|             |           |         | UCLUST         | 0.5 (0.4)         | 0.7 (0.7)      | 0.7 (1.1)      | 0.3 (0.2)      | 0.3 (0.2)      | 0.1 (0.1)      | 0.1 (0.1)      | 0.1 (0.2)      | 0.1 (<0.1)    | 0.3 (0.3)     |
|             |           |         | SortMeRNA      | 0.9 (1.9)         | 2.1 (4.8)      | 1.8 (1.8)      | 2 (1.7)        | 2 (1.5)        | 3.8 (4.2)      | 2.2 (1)        | 2.9 (3.4)      | 2.7 (1.5)     | 2.3 (0.5)     |
|             |           |         | Kallisto       | 422.7 (354.9)     | 765 (324.1)    | 875 (270)      | 934.6 (272.6)  | 1001 (133.8)   | 991.9 (146.7)  | 953.9 (165.3)  | 910.8 (83.5)   | 875.5 (62.5)  | 860.7 (33.1)  |
|             |           |         | USEARCH61      | 0.4 (0.4)         | 0.8 (0.9)      | 0.7 (0.4)      | 0.8 (0.5)      | 0.7 (0.5)      | 0.5 (0.2)      | 0.6 (0.6)      | 0.8 (1)        | 0.6 (0.5)     | 0.5 (0.4)     |
|             |           |         | Mothur NB      | NA (NA)           | NA (NA)        | NA (NA)        | NA (NA)        | NA (NA)        | NA (NA)        | NA (NA)        | NA (NA)        | NA (NA)       | NA (NA)       |
|             |           |         | 16S Classifier | 1253.5 (573.7)    | 1152.9 (532.1) | 1245.4 (311.4) | 1082.1 (302.1) | 1056.5 (189.9) | 1007.4 (142.9) | 964.2 (74.9)   | 876.1 (95.4)   | 933.3 (67.4)  | 908.8 (13.2)  |
|             |           |         | SINTAX         | <0.1 (<0.1)       | 0.2 (1.1)      | 0.1 (0.3)      | 0.1 (0.2)      | 0.6 (1.6)      | 0.2 (0.2)      | 0.3 (0.4)      | 0.5 (1.2)      | 0.7 (0.6)     | 0.5 (0.4)     |
|             | V4        | 190     | Karp           | 10.1 (49.9)       | 6 (11.3)       | 8.4 (8.9)      | 29.1 (49.1)    | 8.1 (7.7)      | 6.2 (4.1)      | 5.2 (1.7)      | 6.1 (3.5)      | 5 (1.6)       | 3.8 (0.8)     |
|             |           |         | Karp-Collapse  | 0.3 (1.7)         | 0.3 (0.8)      | 0.3 (0.5)      | 5.7 (17.3)     | 0.3 (0.3)      | 0.3 (0.2)      | 0.3 (0.2)      | 0.3 (0.1)      | 0.3 (0.2)     | 0.2 (0.1)     |
|             |           |         | UCLUST         | <0.1 (<0.1)       | <0.1 (<0.1)    | <0.1 (<0.1)    | <0.1 (<0.1)    | <0.1 (<0.1)    | <0.1 (<0.1)    | <0.1 (<0.1)    | <0.1 (<0.1)    | <0.1 (<0.1)   | 0.2 (0.6)     |
|             |           |         | SortMeRNA      | 0.1 (<0.1)        | 0.1 (<0.1)     | 0.1 (<0.1)     | 0.1 (<0.1)     | 0.2 (<0.1)     | 0.2 (0.1)      | 0.3 (0.1)      | 0.4 (0.1)      | 0.4 (0.1)     | 0.7 (0.6)     |
|             |           |         | Kallisto       | 433 (357.9)       | 815.4 (401.5)  | 922.9 (303.1)  | 1101.6 (207.4) | 1167.7 (216.8) | 1148.7 (133.4) | 1155.1 (167.4) | 1121.2 (111.8) | 1066.4 (95.6) | 1107.7 (39.1) |
|             |           |         | USEARCH61      | <0.1 (<0.1)       | <0.1 (<0.1)    | <0.1 (<0.1)    | <0.1 (<0.1)    | <0.1 (<0.1)    | <0.1 (<0.1)    | <0.1 (<0.1)    | <0.1 (<0.1)    | <0.1 (<0.1)   | 0.2 (0.6)     |
|             |           |         | Mothur NB      | 354.1 (485)       | 222.7 (108.1)  | 227.1 (182.4)  | 201.7 (79.5)   | 140.5 (41.1)   | 152 (17)       | 136.7 (33.8)   | 109.8 (15.9)   | 91.1 (17.5)   | 51.2 (13.5)   |
|             |           |         | 16S Classifier | 171.8 (510)       | 71.9 (122.7)   | 97.2 (214.6)   | 141.2 (195.1)  | 102.9 (64.3)   | 115.9 (63.8)   | 132.9 (67.9)   | 165 (37.9)     | 151 (46.6)    | 144.4 (13)    |
|             |           |         | SINTAX         | <0.1 (<0.1)       | <0.1 (<0.1)    | <0.1 (<0.1)    | <0.1 (<0.1)    | <0.1 (<0.1)    | <0.1 (<0.1)    | <0.1 (<0.1)    | 0.7 (1.8)      | 0.1 (0.2)     | 0.2 (0.6)     |

SE=Single-end, PE=Paired-end

Table 13: Per species error rates, 100,000 reads

| Read Length    | Region    | Samples    | Method         | Shannon Diversity |             |             |             |             |             |            |            |            |            |           |
|----------------|-----------|------------|----------------|-------------------|-------------|-------------|-------------|-------------|-------------|------------|------------|------------|------------|-----------|
|                |           |            |                | [0,0.7]           | [0.7,1.4]   | [1.4,2]     | [2,2.7]     | [2.7,3.4]   | [3.4,4.1]   | [4.1,4.8]  | [4.8,5.5]  | [5.5,6.2]  | [6.2,6.9]  |           |
| 75bp SE        | Full gene | 130        | Karp           | 1.6 (2.5)         | 2.1 (3.4)   | 4.1 (4.8)   | 4.1 (3.1)   | 4.8 (2.7)   | 4.3 (1.3)   | 4.4 (0.9)  | 4.2 (0.9)  | 3.7 (0.7)  | 3.4 (0.3)  |           |
|                |           |            | Karp-Collapse  | 2.9 (4.4)         | 3.8 (7.1)   | 6.3 (6.4)   | 8.8 (6.2)   | 9.2 (5.2)   | 8.7 (2.6)   | 8.6 (1.4)  | 8.6 (1.2)  | 6.7 (1)    | 5.5 (0.3)  |           |
|                |           |            | UCLUST         | 2.9 (6)           | 5.3 (11.9)  | 7.4 (9.3)   | 7.8 (6.7)   | 9.8 (6.3)   | 7.8 (2.9)   | 8.2 (2.2)  | 8.1 (1.5)  | 6.5 (1.1)  | 5.9 (0.4)  |           |
|                |           |            | SortMeRNA      | 4.1 (10.5)        | 5.6 (12.6)  | 7.7 (9.2)   | 9.4 (8)     | 11 (7.2)    | 9.2 (3.6)   | 9.9 (3.2)  | 9.7 (1.5)  | 8 (1.3)    | 7 (0.4)    |           |
|                |           |            | Kallisto       | 2.4 (3.4)         | 2.9 (5.1)   | 5.5 (6)     | 5.9 (4.2)   | 6.8 (4)     | 5.9 (1.7)   | 5.9 (1.4)  | 5.9 (1)    | 5.1 (0.9)  | 4.7 (0.3)  |           |
|                |           |            | USEARCH61      | 3.5 (8.2)         | 6.1 (14.5)  | 7.5 (8.9)   | 8.5 (7.3)   | 10.1 (6.3)  | 8 (2.6)     | 8.6 (2.5)  | 8.7 (1.5)  | 7 (1.4)    | 6.1 (0.4)  |           |
|                |           |            | Mothur NB      | 5.6 (14.4)        | 8.1 (18.6)  | 12.5 (17.8) | 13.3 (9.5)  | 17.5 (15.4) | 14.6 (8)    | 14 (3.5)   | 14.5 (1.1) | 12.8 (1.6) | 12 (0.9)   |           |
|                |           |            | 16S Classifier | 7.9 (24.2)        | 12.4 (25.7) | 12.5 (20.3) | 11.9 (10.4) | 12.4 (11.4) | 10.5 (7.2)  | 11.1 (4.7) | 11.2 (1.3) | 10.3 (1.4) | 10.8 (0.7) |           |
|                | SINTAX    | 0.9 (2.5)  | 1.5 (3.5)      | 4.8 (10.5)        | 3.5 (5.2)   | 6.2 (4.1)   | 5.0 (2.5)   | 5.9 (3.0)   | 6.7 (1.7)   | 6.0 (1.1)  | 6.6 (0.6)  |            |            |           |
|                | V4        | 130        | Karp           | 0.9 (1.6)         | 1.5 (2.3)   | 2.2 (2.1)   | 2 (1.9)     | 2.6 (1.7)   | 2.6 (1.4)   | 2.1 (0.7)  | 2.3 (0.6)  | 2 (0.3)    | 1.9 (0.3)  |           |
|                |           |            | Karp-Collapse  | 2 (3.6)           | 3.6 (4.5)   | 4 (4)       | 4.5 (4.8)   | 5.3 (3.4)   | 5.7 (2.6)   | 6.1 (1.4)  | 5.2 (1.2)  | 5 (0.6)    | 4.1 (0.4)  |           |
|                |           |            | UCLUST         | 2.2 (4.2)         | 2.9 (3.6)   | 4.5 (5.1)   | 4.9 (5.9)   | 5.3 (4.1)   | 5.1 (2.4)   | 5 (1.4)    | 5.1 (1.8)  | 4.4 (0.6)  | 4.2 (0.4)  |           |
|                |           |            | SortMeRNA      | 1.8 (3.1)         | 3 (3.9)     | 4.6 (5.5)   | 4.5 (4.7)   | 5.5 (4)     | 5.5 (2.6)   | 5.4 (1.2)  | 5.6 (1.6)  | 5.3 (0.8)  | 4.9 (0.5)  |           |
|                |           |            | Kallisto       | 1.6 (2.8)         | 2.4 (3.2)   | 3.3 (3.3)   | 3.1 (3)     | 3.9 (2.5)   | 3.5 (1.8)   | 3.2 (0.9)  | 3.7 (1.1)  | 3.1 (0.5)  | 3.1 (0.4)  |           |
|                |           |            | USEARCH61      | 2.8 (6.2)         | 3 (3.9)     | 4.7 (5.5)   | 4.6 (5.4)   | 5.2 (3.8)   | 4.9 (2.2)   | 4.7 (1.2)  | 5.1 (1.7)  | 4.6 (0.8)  | 4.1 (0.5)  |           |
|                |           |            | Mothur NB      | 8.9 (19.3)        | 7.6 (13)    | 8.6 (11.3)  | 9.6 (10.9)  | 8 (4.7)     | 9.4 (5)     | 9.8 (3.1)  | 9.6 (2.4)  | 9.3 (1)    | 9.4 (0.8)  |           |
| 16S Classifier |           |            | 14.5 (33)      | 12.2 (21)         | 10.9 (18.7) | 8.2 (10.9)  | 6.9 (5.5)   | 7.3 (5)     | 7.7 (2.6)   | 7.6 (2.2)  | 7.1 (0.9)  | 7.9 (0.7)  |            |           |
| SINTAX         | 0.5 (0.6) | 1.3 (2.2)  | 2.7 (5.3)      | 5.7 (7.5)         | 4.6 (5.7)   | 3.9 (2.7)   | 4.2 (1.5)   | 5.2 (2.4)   | 4.4 (0.7)   | 4.9 (0.6)  |            |            |            |           |
| 151bp PE       | Full gene | 130        | Karp           | 0.1 (0.4)         | 0.1 (0.1)   | 0.7 (1.5)   | 0.1 (0.1)   | 0.4 (0.3)   | 0.5 (0.3)   | 0.5 (0.3)  | 0.4 (0.1)  | 0.5 (0.1)  | 0.4 (<0.1) |           |
|                |           |            | Karp-Collapse  | 0.3 (0.4)         | 0.2 (0.4)   | 1.4 (3.5)   | 1.1 (1.3)   | 1.9 (1.6)   | 2 (1.1)     | 2.7 (1.8)  | 2.3 (0.7)  | 1.9 (0.5)  | 1.2 (0.2)  |           |
|                |           |            | UCLUST         | 0.1 (0.1)         | 0.3 (0.5)   | 3.3 (11.8)  | 1.2 (1.3)   | 3.5 (4.1)   | 2.3 (0.9)   | 3.5 (1.4)  | 2.5 (0.8)  | 3 (0.7)    | 2.3 (0.3)  |           |
|                |           |            | SortMeRNA      | 0.3 (0.3)         | 0.5 (0.9)   | 3.3 (9.9)   | 2 (2.1)     | 3 (1.5)     | 4 (2)       | 4.4 (2)    | 4.1 (1.2)  | 4.3 (0.9)  | 3.3 (0.3)  |           |
|                |           |            | Kallisto       | 0.2 (0.6)         | <0.1 (0.1)  | 0.2 (0.7)   | 0.3 (0.4)   | 0.5 (0.5)   | 0.4 (0.3)   | 0.6 (0.5)  | 0.6 (0.2)  | 0.8 (0.2)  | 0.8 (0.1)  |           |
|                |           |            | USEARCH61      | 0.2 (0.2)         | 0.2 (0.3)   | 5.4 (18.3)  | 1.1 (1.7)   | 2.8 (2.1)   | 3 (1.6)     | 3.4 (2)    | 2.2 (0.6)  | 2.9 (0.8)  | 2.5 (0.3)  |           |
|                |           |            | Mothur NB      | 3.3 (5.4)         | 2.9 (5.2)   | 6.4 (8.3)   | 8.9 (8.1)   | 13.9 (6.7)  | 10.4 (4)    | 11.5 (3.7) | 12.5 (2.2) | 13.6 (1.6) | 12.5 (0.5) |           |
|                |           |            | 16S Classifier | 10.3 (24.3)       | 2.5 (4.5)   | 8.7 (15.8)  | 7.6 (9.8)   | 13.5 (9.5)  | 8.1 (4.9)   | 8.2 (3.2)  | 9.9 (2)    | 11.4 (1.9) | 10.7 (0.7) |           |
|                | SINTAX    | 0.1 (0.1)  | 0.3 (0.5)      | 4.9 (18.5)        | 0.9 (1.4)   | 4.0 (3.7)   | 3.0 (2.2)   | 3.5 (2.4)   | 3.5 (1.0)   | 4.2 (1.1)  | 3.4 (0.4)  |            |            |           |
|                | V4        | 190        | Karp           | <0.1 (<0.1)       | <0.1 (<0.1) | <0.1 (<0.1) | <0.1 (<0.1) | <0.1 (<0.1) | <0.1 (<0.1) | 0.3 (0.7)  | 0.1 (0.2)  | 0.1 (<0.1) | 0.1 (<0.1) | 0.2 (0.1) |
|                |           |            | Karp-Collapse  | <0.1 (<0.1)       | <0.1 (0.1)  | <0.1 (<0.1) | <0.1 (<0.1) | <0.1 (<0.1) | <0.1 (<0.1) | 0.2 (0.4)  | 0.1 (0.2)  | 0.1 (0.2)  | 0.1 (0.1)  | 0.1 (0.1) |
|                |           |            | UCLUST         | 7.2 (33.9)        | 0.2 (0.9)   | <0.1 (0.1)  | 3.7 (10.6)  | 0.1 (0.2)   | 0.6 (1.1)   | 0.5 (0.6)  | 0.5 (0.7)  | 0.4 (0.4)  | 0.6 (0.4)  |           |
|                |           |            | SortMeRNA      | 0.4 (1.4)         | 1.6 (6.9)   | 0.7 (2)     | 6.4 (18.8)  | 0.3 (0.4)   | 1.3 (1.3)   | 1.1 (1.3)  | 2.1 (1.3)  | 1.1 (0.6)  | 1.2 (0.6)  |           |
|                |           |            | Kallisto       | <0.1 (0.1)        | 0.1 (0.2)   | 0.1 (0.1)   | 0.3 (0.6)   | 0.4 (0.7)   | 0.9 (1.5)   | 0.8 (0.5)  | 0.8 (0.7)  | 0.7 (0.1)  | 0.8 (0.2)  |           |
|                |           |            | USEARCH61      | 7.7 (33.8)        | 0.2 (0.9)   | 0.3 (1)     | 3.7 (10.7)  | 1.8 (4.9)   | 0.7 (1.6)   | 1.3 (1.6)  | 0.9 (0.9)  | 0.7 (0.4)  | 0.9 (0.5)  |           |
|                |           |            | Mothur NB      | 3.5 (10.7)        | 11.4 (13.1) | 6 (8.9)     | 9.8 (11.7)  | 10.5 (5.9)  | 10 (5.3)    | 9.4 (2.9)  | 9.7 (2.5)  | 10.4 (0.9) | 10.3 (0.8) |           |
| 16S Classifier |           |            | 23.1 (7.4)     | 22.7 (19.8)       | 12.3 (8.1)  | 9.8 (8.3)   | 9.2 (9.4)   | 6 (8.8)     | 2.9 (7.1)   | 2.1 (6.8)  | 0.7 (7.7)  | 0.8 (8.2)  |            |           |
| SINTAX         | 0.1 (0.2) | 3.7 (11.1) | 7.4 (23.1)     | 3.7 (8.6)         | 1.1 (1.7)   | 4.9 (7.0)   | 2.5 (2.2)   | 2.9 (2.6)   | 2.5 (1.3)   | 2.9 (0.9)  |            |            |            |           |

SE=Single-end, PE=Paired-end

Table 14: **Per species error rates, 100,000 reads**

| Read Length | Region    | Samples | Method         | Shannon Diversity |             |             |            |           |             |            |            |             |            |
|-------------|-----------|---------|----------------|-------------------|-------------|-------------|------------|-----------|-------------|------------|------------|-------------|------------|
|             |           |         |                | [0,0.7)           | [0.7,1.4)   | [1.4,2)     | [2,2.7)    | [2.7,3.4) | [3.4,4.1)   | [4.1,4.8)  | [4.8,5.5)  | [5.5,6.2)   | [6.2,6.9]  |
| 301bp PE    | Full gene | 170     | Karp           | 0.1 (0.2)         | 0.5 (1.2)   | 0.4 (0.7)   | <0.1 (0.1) | 0.5 (0.5) | 0.6 (0.6)   | 0.8 (0.4)  | 0.7 (0.3)  | 0.7 (0.3)   | 0.7 (0.1)  |
|             |           |         | Karp-Collapse  | 0.2 (0.3)         | 0.6 (1.4)   | 2 (3.7)     | 0.1 (0.3)  | 0.7 (0.7) | 1 (0.7)     | 1.4 (1.1)  | 1.4 (0.9)  | 0.9 (0.4)   | 0.7 (0.2)  |
|             |           |         | UCLUST         | 0.5 (0.9)         | 1.8 (5.2)   | 1.6 (3.4)   | 0.3 (0.6)  | 0.7 (0.6) | 2 (2.5)     | 1.7 (1.1)  | 1.7 (0.8)  | 1.8 (0.6)   | 1.6 (0.4)  |
|             |           |         | SortMeRNA      | 0.5 (0.8)         | 2 (4)       | 2.2 (3.7)   | 1.7 (1.6)  | 1.5 (1.5) | 4.3 (5.4)   | 3 (1.2)    | 3.1 (1.1)  | 2.9 (0.9)   | 2.6 (0.4)  |
|             |           |         | Kallisto       | 0.8 (1.3)         | 5.2 (10.4)  | 1.4 (2)     | 4.1 (6.6)  | 6.1 (7.1) | 10.7 (8.2)  | 11 (5.9)   | 11.2 (3.4) | 12.7 (2.5)  | 13.1 (1.6) |
|             |           |         | USEARCH61      | 0.4 (0.8)         | 1.2 (3.3)   | 1.6 (2.2)   | 0.5 (0.9)  | 1.1 (1.2) | 1.7 (1.3)   | 1.8 (0.9)  | 2.1 (0.9)  | 2 (0.8)     | 1.6 (0.2)  |
|             |           |         | Mothur NB      | 3.6 (3.3)         | 10.7 (14.8) | 10.9 (9.5)  | 5.2 (3.5)  | 10.4 (4)  | 12.6 (8)    | 13.9 (3.6) | 12.9 (2)   | 13.9 (1.8)  | 12.9 (0.6) |
|             |           |         | 16S Classifier | 20.4 (36.4)       | 16.8 (24.5) | 12.3 (12.1) | 4.6 (4.5)  | 8.4 (4.7) | 9.1 (5.7)   | 11.7 (4.8) | 10 (1.9)   | 11.7 (2.3)  | 11.2 (1)   |
|             |           |         | SINTAX         | 0.5 (1.0)         | 1.4 (3.3)   | 1.3 (3.3)   | 0.3 (0.7)  | 1.8 (2.1) | 3.5 (3.8)   | 2.7 (1.4)  | 3.1 (0.9)  | 3.2 (1.0)   | 3.2 (0.4)  |
|             | V4        | 190     | Karp           | <0.1 (<0.1)       | <0.1 (0.1)  | 0.1 (0.1)   | 0.1 (0.2)  | 0.5 (1.6) | 0.1 (<0.1)  | 0.1 (0.1)  | 0.2 (0.1)  | 0.2 (0.1)   | 0.3 (0.1)  |
|             |           |         | Karp-Collapse  | <0.1 (<0.1)       | <0.1 (0.1)  | <0.1 (<0.1) | 0.1 (0.3)  | 0.4 (1.3) | <0.1 (<0.1) | 0.1 (0.1)  | 0.1 (0.1)  | <0.1 (<0.1) | 0.1 (0.1)  |
|             |           |         | UCLUST         | <0.1 (<0.1)       | 0.6 (3.2)   | <0.1 (<0.1) | <0.1 (0.1) | 0.1 (0.4) | 0.2 (0.6)   | 0.2 (0.4)  | 0.5 (0.9)  | 0.3 (0.3)   | 0.7 (0.2)  |
|             |           |         | SortMeRNA      | <0.1 (<0.1)       | 0.1 (0.2)   | <0.1 (0.1)  | 0.3 (0.5)  | 1.2 (3.5) | 0.8 (1.2)   | 0.8 (0.8)  | 0.9 (0.8)  | 0.6 (0.6)   | 0.6 (0.3)  |
|             |           |         | Kallisto       | 0.1 (0.2)         | 3.3 (7.7)   | 2.4 (4.1)   | 5.3 (10.2) | 3 (2.6)   | 5.6 (2.6)   | 7.6 (4.8)  | 9.4 (2.6)  | 9 (2.6)     | 11 (1.4)   |
|             |           |         | USEARCH61      | <0.1 (<0.1)       | <0.1 (0.1)  | 0.1 (0.4)   | 0.1 (0.4)  | 1.7 (5.2) | 0.6 (0.8)   | 0.7 (1.1)  | 0.5 (0.3)  | 0.6 (0.4)   | 0.7 (0.3)  |
|             |           |         | Mothur NB      | 2 (4)             | 3.3 (5.1)   | 7.2 (9.9)   | 5.5 (5.3)  | 6.3 (5.9) | 9.1 (5.1)   | 9.2 (3.5)  | 10.9 (2.4) | 9.4 (1.9)   | 10 (0.8)   |
|             |           |         | 16S Classifier | 14.9 (33.5)       | 5.6 (9.3)   | 12 (18.9)   | 6.8 (9.2)  | 4.9 (4.6) | 7.1 (4.6)   | 7 (3.5)    | 7.9 (2)    | 7.1 (1.8)   | 8 (1)      |
|             |           |         | SINTAX         | <0.1 (0.2)        | <0.1 (<0.1) | 4.9 (11.9)  | 0.3 (0.7)  | 0.5 (1.0) | 3.6 (5.4)   | 3.0 (2.3)  | 2.5 (1.3)  | 2.3 (1.0)   | 2.9 (0.6)  |

SE=Single-end, PE=Paired-end

Table 15: Per genus error rates, 100,000 reads

| Read Length | Region    | Samples | Method         | Shannon Diversity |             |             |             |             |             |             |            |            |            |
|-------------|-----------|---------|----------------|-------------------|-------------|-------------|-------------|-------------|-------------|-------------|------------|------------|------------|
|             |           |         |                | [0,0.7]           | [0.7,1.4]   | [1.4,2]     | [2,2.7]     | [2.7,3.4]   | [3.4,4.1]   | [4.1,4.8]   | [4.8,5.5]  | [5.5,6.2]  | [6.2,6.9]  |
| 75bp SE     | Full gene | 130     | Karp           | 8.8 (9.7)         | 11.6 (7.5)  | 14.2 (5.5)  | 14.8 (4.2)  | 13.8 (2)    | 14 (1.8)    | 12.9 (1.2)  | 10.8 (0.8) | 10.1 (1)   | 8.3 (0.4)  |
|             |           |         | Karp-Collapse  | 17.3 (18)         | 20.2 (13.3) | 27.7 (9.9)  | 29.7 (6.1)  | 27.6 (3.2)  | 26.6 (2.2)  | 24.3 (2.7)  | 20.9 (1.6) | 18.2 (1.2) | 13.8 (0.4) |
|             |           |         | UCLUST         | 15.3 (17.5)       | 20.1 (15.3) | 26.5 (10.1) | 27.3 (6.5)  | 26.4 (3.6)  | 25.9 (3.2)  | 24.2 (3)    | 19.9 (1.4) | 18.1 (1.4) | 13.8 (0.5) |
|             |           |         | SortMeRNA      | 16.7 (19)         | 21.3 (15.5) | 30.5 (10.9) | 32 (8.3)    | 31.2 (4.9)  | 30.5 (3.5)  | 29 (3.2)    | 25 (1.7)   | 22.7 (2.1) | 17.2 (0.7) |
|             |           |         | Kallisto       | 14.4 (15.1)       | 16.9 (11)   | 21.6 (7.8)  | 22.2 (5.4)  | 21.2 (3.2)  | 20.1 (2.4)  | 18.6 (1.8)  | 15.8 (1.2) | 14.4 (1.4) | 11.7 (0.5) |
|             |           |         | USEARCH61      | 16.3 (19)         | 20.7 (15.3) | 28.2 (10.7) | 28.3 (6.6)  | 27.5 (3.6)  | 26.8 (2.4)  | 25 (2.6)    | 20.9 (1.4) | 18.8 (1.5) | 14.2 (0.5) |
|             |           |         | Mothur NB      | 20.6 (30.4)       | 22.1 (18.2) | 43.6 (25.6) | 37.4 (15.2) | 40.8 (11)   | 39.7 (4.5)  | 37.6 (6.3)  | 36.6 (2.3) | 34 (1.7)   | 31.8 (1.9) |
|             |           |         | 16S Classifier | 89.3 (93.6)       | 86.4 (77.6) | 113 (49.8)  | 99.4 (47.6) | 90.9 (28.9) | 89.1 (24.7) | 86.1 (12.6) | 89 (5.6)   | 86.4 (6.3) | 86.5 (2.5) |
|             |           |         | SINTAX         | 5.2 (5.6)         | 12.7 (15.0) | 19.0 (13.4) | 19.4 (7.6)  | 18.2 (6.7)  | 22.0 (6.5)  | 20.3 (3.1)  | 19.3 (1.6) | 19.7 (2.0) | 19.2 (0.7) |
|             | V4        | 130     | Karp           | 4.7 (6)           | 8.1 (8.7)   | 10.1 (8.3)  | 10.3 (3.8)  | 9.2 (4.1)   | 8.6 (2.8)   | 6.8 (1.6)   | 7.3 (1.2)  | 6.5 (0.9)  | 5.6 (0.5)  |
|             |           |         | Karp-Collapse  | 11.3 (11.3)       | 16.7 (13.7) | 21.6 (14)   | 20.9 (6.7)  | 19.3 (6.2)  | 20.3 (5)    | 16.1 (3.2)  | 15.2 (1.7) | 13.8 (1.6) | 10.4 (0.8) |
|             |           |         | UCLUST         | 7.7 (7.9)         | 15 (17.8)   | 19.6 (16.4) | 19.5 (8.6)  | 17.6 (6.5)  | 16.9 (4.7)  | 13.4 (3.6)  | 13.9 (1.7) | 12 (1.7)   | 9.8 (0.8)  |
|             |           |         | SortMeRNA      | 7.1 (7.9)         | 16.8 (20)   | 20.6 (15.1) | 19.1 (7.7)  | 19.4 (6.7)  | 19.9 (4.6)  | 16.1 (3.3)  | 16.9 (1.5) | 15.9 (1.7) | 12.7 (0.7) |
|             |           |         | Kallisto       | 9.4 (9.4)         | 13.6 (12.2) | 18.7 (14.5) | 16.5 (6.3)  | 15 (4.5)    | 15 (4.1)    | 12.2 (2.3)  | 12.5 (2.1) | 11 (1.3)   | 9.3 (0.7)  |
|             |           |         | USEARCH61      | 8.7 (11.2)        | 17.2 (21.4) | 20.9 (16.4) | 19 (9.3)    | 18.6 (6.3)  | 17.5 (4.1)  | 14 (3.1)    | 14.1 (1.6) | 12.7 (1.8) | 10.1 (0.8) |
|             |           |         | Mothur NB      | 11.5 (10.7)       | 25.7 (25.6) | 34.1 (22.4) | 39.2 (20.6) | 36.8 (9.5)  | 35.4 (8.4)  | 32.2 (5.5)  | 33.2 (3.1) | 30.7 (2.5) | 28.7 (0.9) |
|             |           |         | 16S Classifier | 79.2 (79.9)       | 86.7 (63)   | 77.2 (48.1) | 80.6 (33.6) | 80.9 (14.7) | 76.2 (19.7) | 68 (14.8)   | 72.8 (8.5) | 69 (5.1)   | 70.2 (2.3) |
|             |           |         | SINTAX         | 4.4 (4.5)         | 11.5 (17.8) | 18.8 (21.6) | 17.4 (13.5) | 19.0 (8.4)  | 18.3 (4.9)  | 16.1 (4.5)  | 18.6 (3.2) | 17.3 (2.7) | 17.3 (0.8) |
| 151bp PE    | Full gene | 130     | Karp           | 0.5 (1.4)         | 0.5 (0.6)   | 0.7 (0.9)   | 1 (0.7)     | 1.1 (0.6)   | 0.8 (0.3)   | 1.2 (0.3)   | 1.1 (0.3)  | 1.1 (0.2)  | 1.1 (0.1)  |
|             |           |         | Karp-Collapse  | 1.4 (4)           | 2.3 (4.3)   | 2.1 (3)     | 4.2 (4.7)   | 3 (2.4)     | 2.4 (1.8)   | 4.5 (3.1)   | 2.6 (0.8)  | 2 (0.5)    | 1.8 (0.2)  |
|             |           |         | UCLUST         | 1 (2)             | 1.5 (1.7)   | 5.1 (11.5)  | 2.9 (2.2)   | 3.8 (2.3)   | 3.9 (2)     | 6.2 (2.5)   | 4 (0.7)    | 3.8 (0.7)  | 3.8 (0.5)  |
|             |           |         | SortMeRNA      | 2.7 (4.3)         | 3 (3.8)     | 7.1 (9.6)   | 7.1 (4.3)   | 5.9 (2.5)   | 6 (2.4)     | 8.3 (2.8)   | 6.7 (1.2)  | 6.4 (0.7)  | 5.6 (0.3)  |
|             |           |         | Kallisto       | 0.9 (1.1)         | 1.9 (2)     | 1.6 (1.2)   | 2.7 (1.4)   | 2.7 (1)     | 3.1 (0.8)   | 3.3 (0.6)   | 3.3 (0.3)  | 3.4 (0.3)  | 3.6 (0.1)  |
|             |           |         | USEARCH61      | 2.1 (5.3)         | 1.7 (1.6)   | 3.8 (5)     | 6.5 (6.4)   | 4.6 (4)     | 4.4 (2.8)   | 6 (2.5)     | 4.6 (0.9)  | 4.2 (0.8)  | 4.2 (0.4)  |
|             |           |         | Mothur NB      | 11.4 (20.5)       | 19.8 (17.4) | 26.3 (10.3) | 31.1 (7.6)  | 29.3 (6.6)  | 29.4 (5.2)  | 29.6 (2.6)  | 27.7 (3)   | 27.5 (1.2) | 24.7 (1.1) |
|             |           |         | 16S Classifier | 84.3 (85.7)       | 83.7 (67.3) | 62.9 (38.2) | 71.1 (18.5) | 77.6 (28.2) | 79.4 (10.9) | 73.6 (7.9)  | 77.3 (9.9) | 77.1 (7)   | 75.4 (3.1) |
|             |           |         | SINTAX         | 1.3 (2.5)         | 2.5 (3.9)   | 6.7 (17.0)  | 5.5 (3.6)   | 4.9 (2.0)   | 6.1 (2.8)   | 7.5 (3.3)   | 6.4 (1.4)  | 6.0 (1.4)  | 5.7 (0.7)  |
|             | V4        | 190     | Karp           | <0.1 (<0.1)       | 0.1 (0.3)   | 0.3 (1)     | 0.1 (<0.1)  | 0.4 (0.6)   | 0.3 (0.1)   | 0.5 (0.5)   | 0.4 (0.2)  | 0.5 (0.2)  | 0.6 (0.1)  |
|             |           |         | Karp-Collapse  | <0.1 (0.1)        | 0.1 (0.3)   | 0.3 (1)     | <0.1 (<0.1) | 0.3 (0.6)   | 0.1 (0.2)   | 0.4 (0.5)   | 0.2 (0.3)  | 0.2 (0.2)  | 0.2 (0.1)  |
|             |           |         | UCLUST         | 4 (25)            | 0.4 (1.6)   | 0.8 (2.9)   | 3.6 (10.1)  | 0.6 (1.1)   | 0.4 (0.6)   | 1.5 (3.4)   | 0.9 (0.5)  | 1.1 (0.8)  | 1.5 (0.5)  |
|             |           |         | SortMeRNA      | 2.3 (11)          | 6.6 (21)    | 2.3 (8.2)   | 6.5 (17.6)  | 1.5 (1.6)   | 1.6 (1.6)   | 3.4 (4.2)   | 3.4 (2.4)  | 2.9 (1.5)  | 3 (0.8)    |
|             |           |         | Kallisto       | 0.6 (0.8)         | 1.5 (1.8)   | 2.8 (2.8)   | 2.7 (0.8)   | 3.6 (1.8)   | 3.5 (0.9)   | 3.6 (0.6)   | 3.9 (0.9)  | 4 (0.4)    | 3.9 (0.3)  |
|             |           |         | USEARCH61      | 4.5 (24.8)        | 0.8 (2.5)   | 0.7 (2.8)   | 4.9 (10.3)  | 1 (1.5)     | 0.8 (1)     | 3.5 (4.4)   | 1.8 (1.1)  | 2.4 (1.3)  | 2.4 (0.5)  |
|             |           |         | Mothur NB      | 14.7 (11.2)       | 24.3 (10.4) | 25.8 (17.3) | 30.9 (10.5) | 29.9 (6.7)  | 28.1 (6.2)  | 28.1 (3.1)  | 28.9 (2.3) | 27.4 (2.4) | 24.9 (1.1) |
|             |           |         | 16S Classifier | 39.1 (70.6)       | 55.6 (65.4) | 37.6 (33.4) | 26.6 (21.1) | 33.2 (24.4) | 32.4 (9.1)  | 30 (9.2)    | 34.2 (8.3) | 31.1 (2.7) | 33.2 (3.1) |
|             |           |         | SINTAX         | 7.7 (34.0)        | 8.0 (21.7)  | 11.0 (24.7) | 4.5 (9.4)   | 2.0 (2.4)   | 3.7 (2.5)   | 5.3 (5.4)   | 3.9 (2.2)  | 5.3 (1.3)  | 4.2 (1.0)  |

SE=Single-end, PE=Paired-end

Table 16: Per genus error rates, 100,000 reads

| Read Length | Region    | Samples | Method         | Shannon Diversity |             |             |             |             |             |             |             |            |            |
|-------------|-----------|---------|----------------|-------------------|-------------|-------------|-------------|-------------|-------------|-------------|-------------|------------|------------|
|             |           |         |                | [0,0.7)           | [0.7,1.4)   | [1.4,2)     | [2,2.7)     | [2.7,3.4)   | [3.4,4.1)   | [4.1,4.8)   | [4.8,5.5)   | [5.5,6.2)  | [6.2,6.9]  |
| 301bp PE    | Full gene | 170     | Karp           | 0.2 (0.4)         | 0.8 (1.8)   | 0.3 (0.3)   | 1 (2.1)     | 0.9 (0.7)   | 1.4 (1)     | 1.6 (0.8)   | 1.4 (0.3)   | 1.5 (0.3)  | 1.7 (0.1)  |
|             |           |         | Karp-Collapse  | 0.2 (0.5)         | 0.7 (1.3)   | 1.9 (4.1)   | 1.4 (3.2)   | 1.4 (1.5)   | 1.4 (0.9)   | 1.8 (1.4)   | 1.4 (0.8)   | 1.3 (0.3)  | 0.9 (0.2)  |
|             |           |         | UCLUST         | 0.3 (0.4)         | 1.5 (3.4)   | 2.8 (6.1)   | 2.9 (5.2)   | 1.7 (1.3)   | 3.7 (3.3)   | 3.1 (2.5)   | 2.2 (0.7)   | 2.1 (0.5)  | 2 (0.3)    |
|             |           |         | SortMeRNA      | 0.9 (1.5)         | 2.9 (3.8)   | 4.8 (6.2)   | 4 (4.4)     | 5.5 (3)     | 7.8 (6.1)   | 6.1 (1.6)   | 4.8 (1.2)   | 4.4 (0.7)  | 4 (0.3)    |
|             |           |         | Kallisto       | 15.5 (27.7)       | 26.5 (34.9) | 28.1 (23.7) | 34.9 (26.1) | 37.1 (14.8) | 47.2 (9.2)  | 51.2 (9.2)  | 51.4 (6)    | 53.7 (6)   | 52.1 (2.2) |
|             |           |         | USEARCH61      | 0.2 (0.4)         | 1.8 (4.9)   | 1.7 (2.2)   | 2.4 (5.3)   | 2.3 (2.4)   | 2.4 (1.6)   | 2.8 (1.6)   | 2.6 (0.7)   | 2.1 (0.5)  | 2.1 (0.3)  |
|             |           |         | Mothur NB      | 9.7 (20)          | 25.8 (24.2) | 26.9 (18.3) | 25.4 (12.1) | 30.9 (4.6)  | 31.1 (9.8)  | 30.2 (3.6)  | 28.8 (2.6)  | 28.2 (1.4) | 26.2 (1.3) |
|             |           |         | 16S Classifier | 62.5 (79.6)       | 51.3 (54.8) | 77.7 (50.1) | 60.1 (30.2) | 67.2 (9.7)  | 71.6 (15.1) | 70.2 (12.7) | 65.9 (10.1) | 67 (7.3)   | 67.2 (4)   |
|             |           |         | SINTAX         | 0.7 (1.1)         | 3.9 (8.7)   | 4.0 (6.8)   | 3.0 (3.3)   | 3.5 (3.5)   | 6.4 (4.8)   | 4.8 (2.6)   | 4.1 (1.0)   | 4.4 (0.9)  | 4.3 (0.7)  |
|             | V4        | 190     | Karp           | 0.1 (0.2)         | 0.3 (0.5)   | 0.6 (1)     | 0.8 (1)     | 1.3 (2.8)   | 0.6 (0.2)   | 0.6 (0.1)   | 0.7 (0.2)   | 1 (0.2)    | 1.1 (0.1)  |
|             |           |         | Karp-Collapse  | <0.1 (<0.1)       | 0.1 (0.4)   | <0.1 (0.1)  | 0.2 (0.4)   | <0.1 (0.1)  | 0.2 (0.3)   | 0.1 (0.1)   | 0.1 (0.1)   | 0.1 (<0.1) | 0.1 (<0.1) |
|             |           |         | UCLUST         | <0.1 (<0.1)       | <0.1 (0.1)  | 0.6 (2.5)   | <0.1 (<0.1) | <0.1 (0.1)  | 0.4 (0.8)   | 0.3 (0.4)   | 0.9 (0.9)   | 0.4 (0.3)  | 0.7 (0.4)  |
|             |           |         | SortMeRNA      | 0.1 (0.5)         | 0.7 (2.4)   | 0.4 (2)     | 0.8 (1.6)   | 0.8 (1.5)   | 2 (2.1)     | 1.7 (1.8)   | 2.3 (1.3)   | 1.2 (0.6)  | 1 (0.3)    |
|             |           |         | Kallisto       | 14.6 (28.4)       | 38.1 (43)   | 37.7 (24)   | 41.4 (22.5) | 41.7 (16.7) | 52.6 (17.7) | 47.9 (10.9) | 55.7 (7.3)  | 55.6 (6.9) | 57.5 (2.7) |
|             |           |         | USEARCH61      | <0.1 (0.2)        | 0.2 (0.8)   | <0.1 (<0.1) | 0.2 (0.5)   | 0.1 (0.3)   | 1 (1.2)     | 1 (1.3)     | 0.9 (0.7)   | 1 (0.7)    | 0.9 (0.3)  |
|             |           |         | Mothur NB      | 28.1 (55)         | 27.3 (33.2) | 29.3 (12.6) | 28 (10.5)   | 29.7 (5)    | 30 (3.5)    | 27.3 (3.6)  | 29.7 (3)    | 26.8 (2.2) | 24.7 (1.1) |
|             |           |         | 16S Classifier | 38.4 (74.8)       | 30.4 (42.4) | 52.5 (44.8) | 25 (20.9)   | 32.2 (20.6) | 32.6 (12.2) | 32.9 (10.1) | 31.2 (7.8)  | 32.2 (5.6) | 31.6 (2.4) |
|             |           |         | SINTAX         | 0.5 (1.3)         | 4.2 (14.6)  | 5.1 (17.2)  | 0.7 (1.1)   | 1.8 (4.9)   | 5.9 (4.8)   | 3.4 (2.0)   | 4.3 (2.8)   | 4.0 (2.1)  | 4.1 (0.8)  |

SE=Single-end, PE=Paired-end

Table 17: Per family error rates, 100,000 reads

| Read Length | Region    | Samples | Method         | Shannon Diversity |              |              |              |              |              |              |             |             |             |
|-------------|-----------|---------|----------------|-------------------|--------------|--------------|--------------|--------------|--------------|--------------|-------------|-------------|-------------|
|             |           |         |                | [0,0.7)           | [0.7,1.4)    | [1.4,2)      | [2,2.7)      | [2.7,3.4)    | [3.4,4.1)    | [4.1,4.8)    | [4.8,5.5)   | [5.5,6.2)   | [6.2,6.9]   |
| 75bp SE     | Full gene | 130     | Karp           | 15 (8.3)          | 16.8 (8.4)   | 15.9 (6.3)   | 16.6 (3.8)   | 15.7 (3)     | 13.9 (2.2)   | 13.1 (2)     | 10 (0.7)    | 8.7 (1)     | 6.4 (0.3)   |
|             |           |         | Karp-Collapse  | 34.6 (15.2)       | 31 (13.3)    | 33 (9.5)     | 36.2 (5.9)   | 32.3 (6.5)   | 26.9 (3)     | 25 (3.7)     | 18.9 (1.2)  | 15.4 (1.7)  | 10.7 (0.5)  |
|             |           |         | UCLUST         | 28.6 (13.5)       | 27.7 (13)    | 28.9 (8.8)   | 30 (6.2)     | 28.6 (6.2)   | 23.9 (3)     | 22.3 (3.1)   | 17 (1.4)    | 13.6 (1.7)  | 9.2 (0.5)   |
|             |           |         | SortMeRNA      | 29.7 (14.3)       | 29.1 (13.2)  | 32.9 (10.6)  | 34.9 (5.5)   | 34.5 (7.1)   | 30.1 (3)     | 28.9 (3.7)   | 22.3 (1.5)  | 18.4 (1.9)  | 12.8 (0.5)  |
|             |           |         | Kallisto       | 27.2 (12.8)       | 26.3 (11.6)  | 26.9 (8.2)   | 27.6 (5)     | 25.7 (3.5)   | 21.8 (2.4)   | 20.5 (2.7)   | 15.8 (1.3)  | 13.2 (1.3)  | 9.5 (0.3)   |
|             |           |         | USEARCH61      | 30.7 (14.6)       | 28.6 (13.7)  | 30.5 (10)    | 31 (5.9)     | 29.7 (6.3)   | 24.7 (2.6)   | 23.4 (3.6)   | 17.8 (1.4)  | 14.2 (1.9)  | 9.6 (0.5)   |
|             |           |         | Mothur NB      | 45.3 (56.4)       | 34.1 (21.2)  | 39.1 (21.8)  | 38 (11.1)    | 45.5 (9.6)   | 40.2 (7.4)   | 39.3 (4.2)   | 37.4 (3.2)  | 35.4 (2.1)  | 34.2 (1.8)  |
|             |           |         | 16S Classifier | 173.5 (57.9)      | 131.8 (71.1) | 151.9 (40.2) | 172 (19.3)   | 147.3 (10.6) | 156.1 (12.4) | 149.8 (10.7) | 144.3 (6.9) | 146.4 (4.6) | 145.7 (1.6) |
|             |           |         | SINTAX         | 7.7 (4.1)         | 16.4 (10.6)  | 17.2 (9.4)   | 21.7 (4.7)   | 22.6 (7.3)   | 21.8 (3.3)   | 21.4 (2.7)   | 18.6 (1.5)  | 18.8 (1.7)  | 17.8 (0.7)  |
|             | V4        | 130     | Karp           | 6.1 (7.9)         | 8.6 (7.8)    | 9 (3.9)      | 7.5 (3.9)    | 8.7 (4.2)    | 8.1 (2.1)    | 7 (1.1)      | 6.1 (0.9)   | 5.7 (0.6)   | 4.5 (0.3)   |
|             |           |         | Karp-Collapse  | 17.8 (13.4)       | 20 (12.8)    | 21 (7.3)     | 18.9 (8.1)   | 20.1 (6)     | 18.6 (5.9)   | 16 (2.9)     | 12.8 (1.7)  | 11.1 (0.9)  | 7.9 (0.8)   |
|             |           |         | UCLUST         | 9.3 (11)          | 15.4 (13.7)  | 16.6 (7.9)   | 14.1 (7.9)   | 14.5 (5.9)   | 14.6 (6.7)   | 11.6 (2.3)   | 9.5 (2)     | 8.5 (1)     | 6.1 (0.7)   |
|             |           |         | SortMeRNA      | 9.3 (10.2)        | 15.6 (15.2)  | 17.1 (7.2)   | 14.7 (7.6)   | 17.4 (6.1)   | 18 (5.9)     | 16.2 (3)     | 13.9 (1.9)  | 13.7 (0.7)  | 10.5 (0.8)  |
|             |           |         | Kallisto       | 15.3 (12.1)       | 17.4 (12)    | 20 (10.3)    | 16.6 (6.3)   | 17.3 (5.2)   | 17.2 (5.2)   | 14.8 (1.9)   | 12 (1.1)    | 10.9 (0.6)  | 8.6 (0.4)   |
|             |           |         | USEARCH61      | 11.6 (15)         | 17.9 (17.4)  | 17.2 (7)     | 14.9 (8.2)   | 14.8 (5.8)   | 14.7 (5.6)   | 12.6 (2.5)   | 9.9 (1.8)   | 9 (0.7)     | 6.3 (0.6)   |
|             |           |         | Mothur NB      | 25.9 (29)         | 38 (26.3)    | 38.2 (15.4)  | 44.6 (16)    | 36.4 (9.8)   | 48.3 (13.2)  | 39.7 (5)     | 39.7 (5)    | 36.9 (2.6)  | 35.5 (1.4)  |
|             |           |         | 16S Classifier | 136.5 (69.9)      | 129 (46.1)   | 121.5 (44.5) | 130.7 (19.5) | 117.7 (18.2) | 125 (17.3)   | 114.7 (10.9) | 115.6 (7.7) | 113.2 (2.7) | 112 (3.4)   |
|             |           |         | SINTAX         | 6.3 (6.3)         | 14.2 (12.8)  | 18.8 (10.9)  | 16.7 (8.7)   | 16.9 (4.9)   | 22.2 (7.2)   | 18.1 (2.7)   | 18.5 (2.8)  | 18.3 (1.0)  | 16.6 (0.9)  |
| 151bp PE    | Full gene | 130     | Karp           | 0.5 (1.1)         | 0.8 (1.2)    | 1.1 (1.2)    | 1.4 (0.7)    | 1.4 (0.9)    | 0.9 (0.2)    | 1.4 (0.4)    | 1.1 (0.3)   | 1.2 (0.2)   | 1.1 (0.1)   |
|             |           |         | Karp-Collapse  | 0.6 (1.2)         | 1.7 (2.9)    | 3.8 (5.2)    | 2 (1.9)      | 2.2 (2.5)    | 1.2 (0.5)    | 2.1 (1)      | 1.3 (0.3)   | 1.5 (0.2)   | 1.3 (0.2)   |
|             |           |         | UCLUST         | 2 (5.7)           | 2 (2.5)      | 4.3 (5.6)    | 3.9 (4.6)    | 3.3 (2.9)    | 3.3 (1.4)    | 3.4 (1.8)    | 2.5 (0.5)   | 2.4 (0.5)   | 2.3 (0.3)   |
|             |           |         | SortMeRNA      | 2.3 (4.5)         | 3.3 (4.8)    | 5.5 (6)      | 6.5 (5.5)    | 4.1 (3.1)    | 4.3 (2.3)    | 4.4 (1.9)    | 4.5 (0.5)   | 4.1 (0.6)   | 3.9 (0.3)   |
|             |           |         | Kallisto       | 1.9 (2.2)         | 3.3 (2.4)    | 3.8 (1.7)    | 5.2 (1.8)    | 5.3 (1.1)    | 4.9 (1)      | 5.6 (1.1)    | 5.6 (0.5)   | 5.4 (0.4)   | 5.5 (0.2)   |
|             |           |         | USEARCH61      | 0.9 (1.2)         | 2.1 (2.8)    | 3.9 (4.9)    | 4.7 (3.5)    | 4 (3.3)      | 3.5 (1.5)    | 3.2 (0.8)    | 2.9 (0.4)   | 3 (0.3)     | 2.9 (0.2)   |
|             |           |         | Mothur NB      | 9.9 (14.1)        | 17.1 (10.7)  | 24.6 (17.6)  | 20.7 (10.8)  | 18.4 (8.5)   | 15.2 (5.4)   | 15.7 (3.7)   | 13.7 (2.3)  | 14.3 (1.9)  | 12.2 (1.3)  |
|             |           |         | 16S Classifier | 135.5 (71.3)      | 135.4 (53.5) | 118.7 (39.8) | 123.9 (18.3) | 118.3 (18.9) | 127 (10)     | 113.5 (13)   | 121.8 (9.6) | 114.7 (7)   | 116.3 (3.1) |
|             |           |         | SINTAX         | 2.1 (5.8)         | 2.2 (3.0)    | 4.7 (5.7)    | 4.5 (5.2)    | 3.7 (4.3)    | 3.3 (1.6)    | 3.7 (2.0)    | 2.7 (0.8)   | 2.3 (0.5)   | 2.2 (0.2)   |
|             | V4        | 190     | Karp           | 0.1 (0.1)         | 0.1 (0.3)    | 0.5 (1.9)    | 0.2 (<0.1)   | 0.5 (0.5)    | 0.4 (0.1)    | 0.6 (0.5)    | 0.5 (0.2)   | 0.6 (0.2)   | 0.6 (0.1)   |
|             |           |         | Karp-Collapse  | <0.1 (0.1)        | 0.1 (0.3)    | 0.4 (1.9)    | <0.1 (<0.1)  | 0.3 (0.6)    | 0.3 (0.3)    | 0.4 (0.6)    | 0.2 (0.2)   | 0.3 (0.2)   | 0.2 (0.1)   |
|             |           |         | UCLUST         | 4.1 (25)          | 0.3 (1)      | 0.9 (3.7)    | 4.6 (10.2)   | 1.5 (1.8)    | 0.5 (0.8)    | 2.3 (4.1)    | 1.7 (1)     | 1.5 (0.8)   | 1.7 (0.5)   |
|             |           |         | SortMeRNA      | 2.2 (11.1)        | 0.4 (1)      | 1.3 (3.8)    | 7.6 (17.5)   | 1.6 (1.7)    | 1.6 (1.6)    | 4.4 (5)      | 3.1 (1.6)   | 2.9 (1)     | 3 (0.5)     |
|             |           |         | Kallisto       | 1.7 (1.6)         | 3.9 (2.7)    | 5.1 (3.2)    | 4.8 (1.2)    | 5.9 (1.3)    | 5.7 (1.1)    | 6.3 (0.9)    | 6.3 (0.6)   | 6.1 (0.7)   | 6.3 (0.2)   |
|             |           |         | USEARCH61      | 4.4 (24.8)        | 0.3 (1)      | 1 (3.7)      | 5.1 (10.1)   | 1.4 (1.8)    | 0.7 (0.9)    | 3.9 (5.1)    | 2.7 (1.3)   | 2.8 (1.1)   | 2.6 (0.5)   |
|             |           |         | Mothur NB      | 20.4 (10.5)       | 30.9 (25.5)  | 27.5 (9.8)   | 31.2 (11.8)  | 27.3 (5.2)   | 26 (6.2)     | 21.3 (5.6)   | 19.7 (2.9)  | 16.5 (2.6)  | 14.1 (1.3)  |
|             |           |         | 16S Classifier | 46.6 (18.2)       | 63.7 (48.9)  | 27.4 (26)    | 29.2 (30.5)  | 19 (24.2)    | 9.4 (31.3)   | 6.8 (27)     | 4 (29.1)    | 4.1 (27.3)  | 1.9 (26.9)  |
|             |           |         | SINTAX         | 0.3 (1.2)         | 0.2 (0.8)    | 0.1 (0.1)    | 3.2 (9.2)    | 1.1 (1.8)    | 0.3 (0.4)    | 2.9 (5.0)    | 1.2 (1.2)   | 1.8 (0.9)   | 1.4 (0.4)   |

SE=Single-end, PE=Paired-end

Table 18: **Per family error rates, 100,000 reads**

| Read Length | Region    | Samples | Method         | Shannon Diversity |              |              |             |              |              |             |              |             |            |
|-------------|-----------|---------|----------------|-------------------|--------------|--------------|-------------|--------------|--------------|-------------|--------------|-------------|------------|
|             |           |         |                | [0,0.7)           | [0.7,1.4)    | [1.4,2)      | [2,2.7)     | [2.7,3.4)    | [3.4,4.1)    | [4.1,4.8)   | [4.8,5.5)    | [5.5,6.2)   | [6.2,6.9]  |
| 301bp PE    | Full gene | 170     | Karp           | 0.2 (0.3)         | 0.7 (1.2)    | 0.5 (0.3)    | 0.7 (0.7)   | 1 (0.7)      | 1.3 (0.9)    | 1.6 (0.5)   | 1.3 (0.2)    | 1.4 (0.1)   | 1.6 (0.1)  |
|             |           |         | Karp-Collapse  | 0.1 (0.2)         | 0.4 (0.9)    | 0.2 (0.2)    | 0.5 (0.7)   | 1 (1.4)      | 0.6 (1)      | 1 (0.8)     | 0.6 (0.3)    | 0.5 (0.1)   | 0.5 (0.1)  |
|             |           |         | UCLUST         | <0.1 (0.1)        | 0.2 (0.4)    | 1.5 (4.9)    | 1.6 (3.3)   | 1.7 (1.8)    | 1.6 (2)      | 1.5 (1.4)   | 0.7 (0.4)    | 1 (0.5)     | 0.7 (0.2)  |
|             |           |         | SortMeRNA      | 0.8 (1.7)         | 1.7 (4.2)    | 2.1 (4.8)    | 2.3 (3)     | 3.2 (2.4)    | 2.8 (1.8)    | 3.4 (2)     | 3 (1.1)      | 2.5 (0.4)   | 2.2 (0.3)  |
|             |           |         | Kallisto       | 28.2 (35.2)       | 55.7 (39.3)  | 73.3 (33.7)  | 71.9 (17.7) | 71.2 (12.4)  | 84.9 (15.5)  | 83.7 (9.7)  | 82.1 (5.5)   | 81.4 (7)    | 79.2 (3)   |
|             |           |         | USEARCH61      | <0.1 (0.1)        | 0.2 (0.2)    | 0.2 (0.4)    | 0.6 (1.1)   | 1.5 (2)      | 0.8 (1.1)    | 1.5 (1.1)   | 0.8 (0.4)    | 0.7 (0.2)   | 0.9 (0.2)  |
|             |           |         | Mothur NB      | 6.8 (13.2)        | 14.1 (12.5)  | 12 (9.8)     | 17.6 (11.4) | 23.4 (8.1)   | 15.5 (6.9)   | 19.2 (4.9)  | 14.1 (3.8)   | 15.1 (1.9)  | 12.6 (1.1) |
|             |           |         | 16S Classifier | 94.4 (76.4)       | 109.3 (60.1) | 128.3 (30.1) | 105.9 (33)  | 105.8 (16.5) | 101.6 (15.4) | 96.7 (5.4)  | 93.3 (7.4)   | 90.9 (3.8)  | 93.4 (2.4) |
|             |           |         | SINTAX         | 0.1 (0.1)         | 0.4 (1.2)    | 1.5 (4.8)    | 2.8 (4.4)   | 2.6 (3.6)    | 2.2 (2.1)    | 2.0 (1.3)   | 1.4 (0.8)    | 1.5 (0.6)   | 1.2 (0.2)  |
|             | V4        | 190     | Karp           | 0.3 (0.6)         | 0.6 (0.6)    | 0.9 (1.1)    | 1 (1)       | 1.7 (3)      | 0.8 (0.2)    | 0.9 (0.2)   | 1 (0.2)      | 1.2 (0.2)   | 1.4 (0.1)  |
|             |           |         | Karp-Collapse  | <0.1 (<0.1)       | <0.1 (0.1)   | <0.1 (<0.1)  | <0.1 (<0.1) | <0.1 (0.1)   | 0.1 (0.3)    | <0.1 (<0.1) | 0.1 (0.1)    | <0.1 (<0.1) | 0.1 (<0.1) |
|             |           |         | UCLUST         | <0.1 (<0.1)       | <0.1 (0.1)   | 0.3 (2)      | <0.1 (<0.1) | <0.1 (<0.1)  | <0.1 (<0.1)  | <0.1 (<0.1) | 0.5 (1.6)    | 0.1 (0.1)   | 0.2 (0.2)  |
|             |           |         | SortMeRNA      | <0.1 (<0.1)       | 0.5 (2.1)    | <0.1 (0.1)   | 0.1 (0.1)   | 0.5 (1.4)    | 0.6 (1.1)    | 1.7 (1.8)   | 1.1 (1.1)    | 0.6 (0.2)   | 0.5 (0.2)  |
|             |           |         | Kallisto       | 43.8 (44.7)       | 72.1 (43.5)  | 73.5 (26.6)  | 84.2 (25.6) | 90 (22.8)    | 92.7 (17.2)  | 88.5 (13.6) | 103.5 (11.4) | 98.7 (5.2)  | 99.1 (3.9) |
|             |           |         | USEARCH61      | 3.3 (20.9)        | 0.1 (0.3)    | <0.1 (<0.1)  | <0.1 (<0.1) | <0.1 (<0.1)  | 0.5 (0.9)    | <0.1 (0.1)  | 0.5 (0.5)    | 0.5 (0.6)   | 0.3 (0.2)  |
|             |           |         | Mothur NB      | 39.9 (61.6)       | 42.6 (46.9)  | 26.6 (9.8)   | 28.2 (8.8)  | 27.4 (8.3)   | 23.5 (4.6)   | 23.9 (6.3)  | 22 (4.4)     | 17.3 (2.6)  | 15 (1.4)   |
|             |           |         | 16S Classifier | 19.3 (52)         | 33.2 (52.9)  | 36.1 (39.2)  | 33.8 (22.5) | 31.7 (19.2)  | 26.6 (14.7)  | 29.4 (5.1)  | 29.9 (6.5)   | 26.9 (3.1)  | 25.1 (1.9) |
|             |           |         | SINTAX         | <0.1 (<0.1)       | 6.2 (24.7)   | 0.4 (1.7)    | 0.8 (2.3)   | 1.5 (3.3)    | 0.5 (1.1)    | 0.7 (1.3)   | 1.1 (0.9)    | 1.4 (0.9)   | 1.1 (0.4)  |

SE=Single-end, PE=Paired-end

Table 19: Per order error rates, 100,000 reads

| Read Length | Region    | Samples | Method         | Shannon Diversity |              |              |              |              |             |              |              |             |             |
|-------------|-----------|---------|----------------|-------------------|--------------|--------------|--------------|--------------|-------------|--------------|--------------|-------------|-------------|
|             |           |         |                | [0,0.7]           | [0.7,1.4]    | [1.4,2]      | [2,2.7]      | [2.7,3.4]    | [3.4,4.1]   | [4.1,4.8]    | [4.8,5.5]    | [5.5,6.2]   | [6.2,6.9]   |
| 75bp SE     | Full gene | 130     | Karp           | 15.4 (11.2)       | 13.1 (10.8)  | 10.2 (4.4)   | 11.2 (3.1)   | 12.1 (3.9)   | 8.7 (2.2)   | 8.4 (1.6)    | 5.4 (0.6)    | 5.2 (0.5)   | 4.1 (0.4)   |
|             |           |         | Karp-Collapse  | 36.1 (17.9)       | 29.4 (16.5)  | 23.4 (7.2)   | 26.1 (7.4)   | 25.6 (8.5)   | 18.5 (3.5)  | 17 (3)       | 11.2 (1)     | 9.9 (1)     | 7.4 (0.5)   |
|             |           |         | UCLUST         | 28.9 (21.3)       | 23.1 (17.8)  | 17.1 (7.4)   | 19.7 (7.4)   | 20.4 (8.2)   | 14.1 (3.3)  | 13.5 (2.8)   | 8.9 (1)      | 7.7 (0.9)   | 5.7 (0.3)   |
|             |           |         | SortMeRNA      | 32.1 (23.6)       | 26.6 (18.9)  | 22.1 (7.9)   | 24.4 (6.8)   | 27.4 (9.3)   | 20.4 (3.7)  | 20 (2.8)     | 13.6 (1.3)   | 12.8 (1)    | 10.1 (0.7)  |
|             |           |         | Kallisto       | 28.4 (15.3)       | 24.5 (14.2)  | 19.3 (6)     | 21.1 (5.1)   | 19.9 (5.2)   | 15.4 (2.9)  | 14.7 (2.5)   | 10 (0.9)     | 9.4 (0.7)   | 7.4 (0.3)   |
|             |           |         | USEARCH61      | 30.4 (22.6)       | 24.8 (19.3)  | 19 (8.3)     | 20.3 (7.1)   | 21.2 (8.3)   | 14.8 (3.3)  | 14.3 (3)     | 9.5 (1)      | 8.1 (0.9)   | 6.1 (0.4)   |
|             |           |         | Mothur NB      | 46 (52.8)         | 43.3 (28.7)  | 39.3 (20.9)  | 33.2 (13.1)  | 49.5 (10.8)  | 37.2 (4.6)  | 36.3 (4.8)   | 35.6 (2.3)   | 34.4 (2.5)  | 33.7 (1.5)  |
|             |           |         | 16S Classifier | 178.7 (24.8)      | 174 (16.1)   | 153.3 (18.7) | 151.9 (26.1) | 152.7 (10.7) | 144.4 (8.1) | 141.2 (13.7) | 139 (7.5)    | 141.7 (3.2) | 142.5 (1.7) |
|             |           |         | SINTAX         | 12.3 (14.1)       | 20.0 (12.1)  | 15.1 (7.6)   | 19.5 (7.9)   | 24.2 (8.6)   | 20.9 (4.2)  | 22.3 (2.9)   | 20.0 (1.0)   | 20.1 (0.9)  | 20.6 (0.6)  |
|             | V4        | 130     | Karp           | 3.8 (4.7)         | 5.4 (4.5)    | 5.5 (3.2)    | 5.5 (3.4)    | 5.9 (1.4)    | 5.7 (1.4)   | 4.6 (0.8)    | 4.3 (0.5)    | 3.8 (0.4)   | 3.3 (0.2)   |
|             |           |         | Karp-Collapse  | 16.8 (12.9)       | 14.9 (12.1)  | 16.1 (8.4)   | 12.5 (4.8)   | 14.4 (2.4)   | 13.8 (3.7)  | 10.4 (2)     | 9.2 (2.1)    | 7.1 (0.6)   | 5.2 (0.4)   |
|             |           |         | UCLUST         | 6.5 (9)           | 8.2 (7.9)    | 7.7 (5.8)    | 6.1 (4.9)    | 8.2 (2)      | 8.5 (4.4)   | 5.5 (1.2)    | 6 (1.4)      | 4.4 (0.6)   | 3.5 (0.3)   |
|             |           |         | SortMeRNA      | 7.4 (9.6)         | 8.4 (7.1)    | 10.5 (6)     | 9.7 (5)      | 12.3 (1.6)   | 13.5 (3.2)  | 11.5 (2.6)   | 11.4 (2.1)   | 10.3 (0.6)  | 9.2 (0.6)   |
|             |           |         | Kallisto       | 14 (11.7)         | 13.8 (10.6)  | 14.5 (7.4)   | 12.6 (4.9)   | 13.6 (1.9)   | 13.1 (3.9)  | 11.1 (1.5)   | 10.1 (0.8)   | 9.1 (0.7)   | 7.8 (0.4)   |
|             |           |         | USEARCH61      | 9 (14.2)          | 9 (9.5)      | 8.7 (6.8)    | 7.5 (5.8)    | 8.6 (1.9)    | 8.6 (3.9)   | 6.5 (1.8)    | 6.4 (1.6)    | 4.9 (0.5)   | 3.8 (0.4)   |
|             |           |         | Mothur NB      | 31.4 (31.7)       | 41 (39.3)    | 48.5 (25)    | 42.3 (15)    | 46.9 (13.2)  | 47.5 (6)    | 39.7 (6.2)   | 40.1 (6.1)   | 35.6 (2)    | 34.1 (1.2)  |
|             |           |         | 16S Classifier | 148.1 (61.4)      | 126.5 (44.3) | 130.9 (37.7) | 112.6 (29.9) | 118.5 (12.5) | 116 (14.4)  | 106 (17.6)   | 108.1 (12.9) | 103.8 (4.9) | 102.4 (2.8) |
|             |           |         | SINTAX         | 6.7 (6.0)         | 14.2 (10.4)  | 14.9 (8.1)   | 14.5 (7.2)   | 19.4 (3.2)   | 18.9 (4.8)  | 17.7 (1.9)   | 18.4 (2.8)   | 17.1 (0.5)  | 16.6 (0.5)  |
| 151bp PE    | Full gene | 130     | Karp           | 0.5 (1.1)         | 0.6 (1)      | 0.8 (0.7)    | 1.2 (0.8)    | 1.2 (0.9)    | 0.8 (0.4)   | 1.2 (0.3)    | 1 (0.2)      | 1 (0.1)     | 1 (0.1)     |
|             |           |         | Karp-Collapse  | 0.5 (1.1)         | 0.6 (1)      | 0.9 (1)      | 1.1 (0.8)    | 1.8 (2.5)    | 0.8 (0.5)   | 1.4 (0.6)    | 1 (0.3)      | 1 (0.2)     | 1 (0.1)     |
|             |           |         | UCLUST         | 0.4 (0.3)         | 1 (1)        | 1.3 (1.1)    | 2.8 (3.8)    | 2.3 (2.9)    | 1.6 (0.9)   | 1.8 (0.5)    | 1.6 (0.4)    | 1.5 (0.2)   | 1.5 (0.2)   |
|             |           |         | SortMeRNA      | 2.2 (4.2)         | 1.1 (0.8)    | 2.3 (1.9)    | 3.6 (4.2)    | 2.5 (2.9)    | 2.4 (1)     | 2.4 (0.4)    | 3.1 (0.6)    | 3 (0.4)     | 3.2 (0.3)   |
|             |           |         | Kallisto       | 2.2 (2.1)         | 3.9 (2.3)    | 5 (2.4)      | 6.1 (1.8)    | 5.8 (1.3)    | 5.7 (0.9)   | 6.6 (0.8)    | 6 (0.6)      | 6.1 (0.5)   | 6.4 (0.2)   |
|             |           |         | USEARCH61      | 1.4 (2.1)         | 1.4 (0.8)    | 2.2 (1.6)    | 3.7 (3.6)    | 3.2 (3.8)    | 2.1 (0.5)   | 2.4 (0.5)    | 2.1 (0.3)    | 2.2 (0.3)   | 2.1 (0.3)   |
|             |           |         | Mothur NB      | 6.3 (9.5)         | 8.3 (7.1)    | 13.7 (15.2)  | 10 (7.5)     | 11.2 (7.3)   | 8 (3.1)     | 6.5 (2.8)    | 6.9 (2.9)    | 6.1 (1.3)   | 5.4 (1.1)   |
|             |           |         | 16S Classifier | 145.4 (60.4)      | 122.3 (49.7) | 111.6 (48.1) | 103.4 (35.7) | 111.8 (16.8) | 110 (19.6)  | 100.7 (14.8) | 105.4 (9.8)  | 96.7 (6.3)  | 99.8 (1.8)  |
|             |           |         | SINTAX         | 0.3 (0.5)         | 1.0 (1.8)    | 1.0 (1.4)    | 2.5 (4.2)    | 2.2 (4.5)    | 1.2 (1.1)   | 1.1 (0.4)    | 1.3 (0.8)    | 1.1 (0.3)   | 1.2 (0.3)   |
|             | V4        | 190     | Karp           | 0.1 (<0.1)        | 0.2 (0.3)    | 0.6 (2.2)    | 0.2 (<0.1)   | 0.5 (0.5)    | 0.4 (0.1)   | 0.6 (0.4)    | 0.5 (0.2)    | 0.5 (0.1)   | 0.6 (0.1)   |
|             |           |         | Karp-Collapse  | <0.1 (0.1)        | 0.1 (0.4)    | 0.5 (2.3)    | <0.1 (<0.1)  | 0.3 (0.6)    | 0.2 (0.2)   | 0.3 (0.5)    | 0.2 (0.2)    | 0.2 (0.2)   | 0.2 (0.1)   |
|             |           |         | UCLUST         | 2 (11.2)          | 0.4 (1.2)    | 1 (3.3)      | 5.7 (11.1)   | 2.7 (2.2)    | 2.6 (3.1)   | 2.9 (3.7)    | 2.2 (1.1)    | 2 (1.2)     | 2.1 (0.4)   |
|             |           |         | SortMeRNA      | 2.4 (11.2)        | 0.5 (1.2)    | 2.4 (6.7)    | 8.5 (17.9)   | 2.6 (1.5)    | 3 (2.9)     | 4.3 (4.4)    | 3.3 (1.4)    | 3 (1.2)     | 3 (0.3)     |
|             |           |         | Kallisto       | 2.1 (1.7)         | 5.3 (2.8)    | 7.1 (3.5)    | 5.7 (1.4)    | 6.9 (1.3)    | 7.5 (1.9)   | 7.5 (1.2)    | 7.4 (0.8)    | 7.3 (0.5)   | 7.5 (0.4)   |
|             |           |         | USEARCH61      | 2.3 (11.2)        | 0.5 (1.2)    | 2.4 (6.7)    | 6.1 (11)     | 2.6 (1.5)    | 2.7 (3)     | 4.1 (4.1)    | 3 (1.3)      | 3 (1.3)     | 2.7 (0.2)   |
|             |           |         | Mothur NB      | 30 (32.7)         | 33.9 (24.7)  | 32.3 (22)    | 32.7 (8)     | 27.3 (9.2)   | 22.6 (4.3)  | 17.3 (4.9)   | 14.2 (2.8)   | 11.1 (1.9)  | 9.4 (0.7)   |
|             |           |         | 16S Classifier | 23.2 (55.8)       | 26.5 (40.5)  | 14.1 (21.7)  | 23.7 (30.5)  | 17.5 (12.3)  | 23.7 (9.7)  | 24.7 (5.9)   | 23.2 (5)     | 23.7 (4)    | 22.3 (2.1)  |
|             |           |         | SINTAX         | 0.3 (1.2)         | <0.1 (<0.1)  | <0.1 (0.1)   | 3.0 (9.2)    | 2.2 (4.9)    | 0.4 (0.6)   | 1.2 (3.2)    | 0.7 (1.1)    | 0.7 (0.8)   | 0.4 (0.2)   |

SE=Single-end, PE=Paired-end

Table 20: Per order error rates, 100,000 reads

| Read Length | Region    | Samples | Method         | Shannon Diversity |              |             |              |              |              |              |              |             |             |
|-------------|-----------|---------|----------------|-------------------|--------------|-------------|--------------|--------------|--------------|--------------|--------------|-------------|-------------|
|             |           |         |                | [0,0.7)           | [0.7,1.4)    | [1.4,2)     | [2,2.7)      | [2.7,3.4)    | [3.4,4.1)    | [4.1,4.8)    | [4.8,5.5)    | [5.5,6.2)   | [6.2,6.9]   |
| 301bp PE    | Full gene | 170     | Karp           | 0.3 (0.3)         | 0.7 (1.2)    | 0.5 (0.6)   | 0.6 (0.6)    | 1 (0.7)      | 1.1 (0.8)    | 1.2 (0.5)    | 1.1 (0.2)    | 1.2 (0.2)   | 1.3 (0.1)   |
|             |           |         | Karp-Collapse  | 0.1 (0.3)         | 0.4 (0.9)    | 0.1 (0.1)   | 0.3 (0.7)    | 0.7 (1.4)    | 0.2 (0.2)    | 0.6 (0.8)    | 0.3 (0.2)    | 0.3 (0.1)   | 0.3 (0.1)   |
|             |           |         | UCLUST         | <0.1 (0.1)        | <0.1 (0.1)   | 0.2 (0.4)   | 0.1 (0.1)    | 0.7 (1.7)    | 0.1 (0.2)    | 0.6 (1.1)    | 0.2 (0.2)    | 0.5 (0.6)   | 0.3 (0.1)   |
|             |           |         | SortMeRNA      | 0.3 (0.6)         | 0.4 (0.7)    | 0.6 (0.8)   | 0.4 (0.4)    | 1.2 (1.8)    | 1.2 (1)      | 2 (1.8)      | 1.4 (0.3)    | 1.7 (0.3)   | 1.7 (0.1)   |
|             |           |         | Kallisto       | 42.3 (36)         | 67.4 (36.1)  | 81.8 (32.3) | 84.9 (17.8)  | 96.7 (21)    | 92 (16.2)    | 97.9 (17.3)  | 92.2 (4)     | 92.3 (8)    | 88.6 (2.7)  |
|             |           |         | USEARCH61      | <0.1 (0.1)        | <0.1 (0.2)   | <0.1 (0.1)  | <0.1 (<0.1)  | 0.9 (2)      | 0.2 (0.2)    | 0.8 (1.1)    | 0.3 (0.2)    | 0.3 (0.2)   | 0.4 (0.1)   |
|             |           |         | Mothur NB      | 4.1 (13.1)        | 9.6 (14.1)   | 5.9 (6.7)   | 5.3 (6.5)    | 13.2 (11.2)  | 8.8 (3.7)    | 8.1 (2.3)    | 7 (2.3)      | 6.4 (0.9)   | 5.1 (0.7)   |
|             |           |         | 16S Classifier | 91.3 (66.2)       | 107.7 (65.1) | 108.4 (38)  | 90 (39.3)    | 98.2 (23.3)  | 99.2 (16.9)  | 90.3 (6.4)   | 89.8 (11.6)  | 86.7 (4.4)  | 86.8 (2.7)  |
|             |           |         | SINTAX         | <0.1 (<0.1)       | 0.1 (0.3)    | 0.2 (0.5)   | 0.6 (1.5)    | 1.4 (3.4)    | 0.6 (0.6)    | 1.1 (1.1)    | 0.6 (0.4)    | 0.7 (0.7)   | 0.6 (0.2)   |
|             | V4        | 190     | Karp           | 0.3 (0.7)         | 0.7 (0.6)    | 1 (1.1)     | 1.1 (1.1)    | 1.6 (3)      | 0.9 (0.5)    | 0.9 (0.2)    | 1 (0.2)      | 1.1 (0.1)   | 1.2 (0.1)   |
|             |           |         | Karp-Collapse  | <0.1 (<0.1)       | <0.1 (<0.1)  | <0.1 (<0.1) | <0.1 (<0.1)  | <0.1 (<0.1)  | <0.1 (<0.1)  | <0.1 (<0.1)  | <0.1 (<0.1)  | <0.1 (<0.1) | 0.1 (<0.1)  |
|             |           |         | UCLUST         | <0.1 (<0.1)       | <0.1 (0.1)   | <0.1 (<0.1) | <0.1 (<0.1)  | <0.1 (<0.1)  | <0.1 (<0.1)  | <0.1 (<0.1)  | <0.1 (<0.1)  | <0.1 (0.1)  | 0.1 (0.1)   |
|             |           |         | SortMeRNA      | <0.1 (<0.1)       | <0.1 (0.1)   | <0.1 (<0.1) | 0.1 (0.1)    | 1.2 (3.5)    | 0.2 (0.1)    | 0.5 (0.7)    | 0.5 (0.2)    | 0.4 (0.1)   | 0.2 (0.1)   |
|             |           |         | Kallisto       | 59.1 (48.6)       | 98.6 (39.5)  | 84.3 (30.2) | 110.3 (17.5) | 105.9 (21.4) | 114.4 (10.4) | 113.3 (13.4) | 120.4 (10.8) | 117.4 (6.1) | 117.2 (4.3) |
|             |           |         | USEARCH61      | <0.1 (<0.1)       | <0.1 (0.3)   | <0.1 (<0.1) | <0.1 (<0.1)  | <0.1 (<0.1)  | <0.1 (<0.1)  | <0.1 (<0.1)  | 0.1 (0.3)    | 0.1 (0.2)   | 0.1 (0.1)   |
|             |           |         | Mothur NB      | 40.3 (58.1)       | 38.3 (41.9)  | 22 (11.8)   | 25.9 (11.6)  | 21.5 (8.8)   | 21 (4.6)     | 16.9 (3.9)   | 15.6 (4.6)   | 11.3 (1.9)  | 8.4 (1.5)   |
|             |           |         | 16S Classifier | 2.5 (4.8)         | 25.6 (42.5)  | 18.2 (31.1) | 26 (31.1)    | 22.9 (26.2)  | 20.3 (11.4)  | 26.1 (7.3)   | 23 (5.3)     | 20.2 (4.4)  | 20.4 (2.7)  |
|             |           |         | SINTAX         | <0.1 (<0.1)       | 0.4 (1.8)    | <0.1 (<0.1) | 0.1 (0.3)    | <0.1 (<0.1)  | <0.1 (<0.1)  | 0.2 (0.5)    | 0.3 (0.5)    | 0.6 (0.7)   | 0.4 (0.2)   |

SE=Single-end, PE=Paired-end

Table 21: Per class error rates, 100,000 reads

| Read Length | Region    | Samples | Method         | Shannon Diversity |              |              |              |              |              |            |             |             |             |
|-------------|-----------|---------|----------------|-------------------|--------------|--------------|--------------|--------------|--------------|------------|-------------|-------------|-------------|
|             |           |         |                | [0,0.7]           | [0.7,1.4]    | [1.4,2]      | [2,2.7]      | [2.7,3.4]    | [3.4,4.1]    | [4.1,4.8]  | [4.8,5.5]   | [5.5,6.2]   | [6.2,6.9]   |
| 75bp SE     | Full gene | 130     | Karp           | 10.2 (6.3)        | 6.2 (4.3)    | 6 (2)        | 7 (2.5)      | 5.3 (1.3)    | 4.3 (0.9)    | 3.5 (0.9)  | 2.5 (0.3)   | 2.6 (0.3)   | 2.1 (0.3)   |
|             |           |         | Karp-Collapse  | 26.6 (12.5)       | 18 (8.9)     | 16.2 (4)     | 17.1 (5.1)   | 12.8 (2)     | 10.9 (2)     | 8.6 (1.5)  | 6.2 (0.6)   | 5.7 (0.7)   | 4.2 (0.4)   |
|             |           |         | UCLUST         | 19 (18.1)         | 10.4 (7.6)   | 9.7 (3.3)    | 11.2 (4.6)   | 7.8 (2.2)    | 6.4 (1.6)    | 5.1 (1.1)  | 3.5 (0.5)   | 3.2 (0.3)   | 2.3 (0.2)   |
|             |           |         | SortMeRNA      | 22.2 (19.7)       | 14.3 (8.2)   | 14.6 (4.4)   | 16.4 (5.7)   | 13 (3)       | 12.1 (1.9)   | 10.9 (1.4) | 8 (0.8)     | 8.2 (1)     | 6.8 (0.5)   |
|             |           |         | Kallisto       | 20.8 (9.4)        | 15 (6.1)     | 13.4 (3.7)   | 14.5 (4.5)   | 10.7 (1.6)   | 9.3 (1.7)    | 8.2 (1.6)  | 5.9 (0.5)   | 5.9 (0.2)   | 5.2 (0.2)   |
|             |           |         | USEARCH61      | 20 (18.7)         | 11.4 (8.1)   | 11.1 (3.7)   | 11.7 (4.4)   | 8.3 (1.9)    | 7 (1.5)      | 5.6 (1.3)  | 3.8 (0.5)   | 3.5 (0.3)   | 2.5 (0.3)   |
|             |           |         | Mothur NB      | 35.6 (47.1)       | 33.6 (24.1)  | 34 (20.5)    | 29.8 (12.7)  | 38.4 (5.7)   | 30.8 (4.4)   | 30.6 (4.3) | 34.4 (2.7)  | 34.5 (2.3)  | 33.1 (1.1)  |
|             |           |         | 16S Classifier | 165.6 (33.8)      | 158.3 (24.1) | 137.5 (28.4) | 131.5 (35.1) | 146 (11.4)   | 129.8 (11.7) | 123.7 (14) | 122.9 (8.7) | 125.4 (3.1) | 125.5 (2.8) |
|             |           |         | SINTAX         | 8.6 (14.3)        | 7.3 (6.2)    | 7.8 (3.9)    | 11.0 (5.2)   | 9.9 (2.7)    | 9.8 (2.8)    | 9.4 (2.0)  | 8.7 (0.8)   | 8.9 (0.6)   | 8.8 (0.5)   |
|             | V4        | 130     | Karp           | 1.4 (1.5)         | 2.5 (1.5)    | 3.8 (2)      | 3.3 (2.7)    | 3 (1)        | 2.9 (0.9)    | 2.7 (0.4)  | 2.4 (0.6)   | 2.2 (0.2)   | 2.2 (0.3)   |
|             |           |         | Karp-Collapse  | 9.9 (7.2)         | 7.9 (4.6)    | 10.7 (5.7)   | 7.5 (3.2)    | 7.6 (1.3)    | 6.9 (2.2)    | 5.3 (1.1)  | 5 (1.7)     | 3.6 (0.4)   | 3 (0.3)     |
|             |           |         | UCLUST         | 2 (2.3)           | 2.4 (2.1)    | 3.9 (3)      | 2.3 (0.4)    | 2.7 (0.8)    | 3.2 (1.2)    | 2 (0.2)    | 2.6 (1.1)   | 1.7 (0.3)   | 1.6 (0.2)   |
|             |           |         | SortMeRNA      | 2.8 (1.8)         | 3.8 (2.4)    | 6.7 (2.7)    | 6.1 (2.1)    | 6.8 (1.2)    | 7.7 (2.4)    | 7.3 (1.5)  | 7.2 (1.8)   | 6.9 (0.6)   | 6.8 (0.5)   |
|             |           |         | Kallisto       | 7.9 (6.1)         | 7.5 (3.1)    | 9.9 (4.7)    | 7.9 (2)      | 7.9 (1)      | 7.4 (1)      | 7 (0.7)    | 6.7 (0.7)   | 6.8 (0.3)   | 6.4 (0.4)   |
|             |           |         | USEARCH61      | 2.3 (3.2)         | 2.5 (2)      | 4.4 (3.7)    | 2.8 (0.6)    | 3 (0.7)      | 3.2 (1.4)    | 2.5 (0.5)  | 2.8 (1)     | 1.9 (0.2)   | 1.7 (0.2)   |
|             |           |         | Mothur NB      | 27.7 (39.5)       | 23.3 (15.4)  | 36.3 (20.4)  | 35.7 (13.4)  | 35 (11.2)    | 36.5 (7.4)   | 33.9 (5.3) | 34.1 (3)    | 32.3 (2.5)  | 32 (0.9)    |
|             |           |         | 16S Classifier | 138.8 (59.2)      | 119.1 (42.7) | 120.8 (33.7) | 105 (28.9)   | 108.9 (13.3) | 106.2 (12.8) | 94.3 (16)  | 96.6 (11.2) | 94 (3.3)    | 93.3 (2.1)  |
|             |           |         | SINTAX         | 3.4 (3.3)         | 6.0 (5.0)    | 9.7 (5.2)    | 6.7 (2.7)    | 9.0 (2.0)    | 8.2 (1.9)    | 7.1 (1.4)  | 8.0 (2.0)   | 6.3 (0.5)   | 6.3 (0.4)   |
| 151bp PE    | Full gene | 130     | Karp           | 0.5 (1.1)         | 0.6 (1)      | 0.7 (0.7)    | 1 (0.8)      | 0.9 (0.6)    | 0.7 (0.3)    | 1 (0.3)    | 0.8 (0.2)   | 0.7 (0.1)   | 0.7 (0.1)   |
|             |           |         | Karp-Collapse  | 0.5 (1.1)         | 0.6 (1)      | 0.7 (0.7)    | 0.8 (0.7)    | 0.9 (0.7)    | 0.5 (0.2)    | 1 (0.4)    | 0.8 (0.3)   | 0.7 (0.1)   | 0.7 (0.1)   |
|             |           |         | UCLUST         | 0.4 (0.3)         | 0.7 (0.4)    | 0.9 (0.5)    | 0.9 (0.2)    | 1.2 (0.3)    | 1.1 (0.2)    | 1 (0.2)    | 1.1 (0.4)   | 0.9 (0.1)   | 0.9 (0.1)   |
|             |           |         | SortMeRNA      | 1.1 (3)           | 0.8 (0.5)    | 1.1 (0.5)    | 1.2 (0.3)    | 1.2 (0.4)    | 1.6 (0.4)    | 1.7 (0.2)  | 2 (0.6)     | 1.9 (0.4)   | 2.3 (0.2)   |
|             |           |         | Kallisto       | 2.2 (2.1)         | 3.5 (2.2)    | 4.9 (2.4)    | 5.9 (1.8)    | 5.4 (1.4)    | 5.3 (0.8)    | 6.1 (1)    | 5.5 (0.8)   | 5.5 (0.5)   | 5.8 (0.2)   |
|             |           |         | USEARCH61      | 0.7 (0.7)         | 1.3 (0.7)    | 1.6 (0.9)    | 2.1 (0.7)    | 1.6 (0.5)    | 1.6 (0.4)    | 1.6 (0.4)  | 1.4 (0.3)   | 1.3 (0.2)   | 1.3 (0.2)   |
|             |           |         | Mothur NB      | 5.5 (6.2)         | 7 (6.6)      | 7.6 (6)      | 5.8 (5.3)    | 5.3 (3.3)    | 4.1 (1.5)    | 4.4 (1.8)  | 3.7 (1.2)   | 3.2 (0.9)   | 2.7 (0.5)   |
|             |           |         | 16S Classifier | 139.2 (59.7)      | 107.7 (49.1) | 97.5 (43.2)  | 90.9 (34.2)  | 98 (17.6)    | 98.8 (17.4)  | 87.9 (14)  | 90.9 (9.1)  | 83.4 (6.8)  | 86.4 (1.8)  |
|             |           |         | SINTAX         | 0.2 (0.3)         | 0.2 (0.2)    | 0.3 (0.3)    | 0.3 (0.1)    | 0.3 (0.1)    | 0.3 (0.1)    | 0.3 (0.1)  | 0.3 (0.4)   | 0.2 (0.1)   | 0.2 (<0.1)  |
|             | V4        | 190     | Karp           | 0.1 (<0.1)        | 0.2 (0.3)    | 0.6 (2.2)    | 0.2 (<0.1)   | 0.5 (0.5)    | 0.3 (0.1)    | 0.5 (0.5)  | 0.4 (0.2)   | 0.4 (0.1)   | 0.4 (0.1)   |
|             |           |         | Karp-Collapse  | <0.1 (0.1)        | 0.1 (0.4)    | 0.5 (2.3)    | <0.1 (<0.1)  | 0.3 (0.6)    | 0.1 (0.1)    | 0.3 (0.5)  | 0.2 (0.2)   | 0.2 (0.1)   | 0.2 (0.1)   |
|             |           |         | UCLUST         | 0.3 (0.9)         | 0.4 (1.2)    | 1 (3.3)      | 5.7 (11.1)   | 2.1 (1.5)    | 2.5 (3)      | 2.6 (2.9)  | 2 (1.1)     | 1.8 (1.1)   | 1.7 (0.4)   |
|             |           |         | SortMeRNA      | 0.7 (1.4)         | 0.5 (1.2)    | 2.4 (6.7)    | 8.4 (17.8)   | 2.6 (1.5)    | 3 (2.9)      | 3.9 (3.7)  | 3 (1.2)     | 2.6 (1.1)   | 2.5 (0.3)   |
|             |           |         | Kallisto       | 2 (1.7)           | 5.2 (2.8)    | 7 (3.5)      | 5.6 (1.4)    | 6.6 (1.4)    | 6.9 (1.7)    | 7.1 (1.3)  | 7 (0.8)     | 6.8 (0.4)   | 7 (0.3)     |
|             |           |         | USEARCH61      | 0.6 (1.4)         | 0.5 (1.2)    | 2.3 (6.7)    | 6 (11)       | 2.6 (1.5)    | 2.7 (3)      | 3.7 (3.5)  | 2.7 (1.1)   | 2.5 (1.2)   | 2.3 (0.3)   |
|             |           |         | Mothur NB      | 29.3 (32.6)       | 25.5 (7)     | 25.3 (10.8)  | 29.9 (8.1)   | 21.6 (8.2)   | 16.6 (4.2)   | 12.6 (3.7) | 9.1 (1.9)   | 7.2 (1.5)   | 5.8 (0.7)   |
|             |           |         | 16S Classifier | 22.1 (56)         | 21.1 (41.2)  | 10.7 (19.4)  | 13.4 (14.5)  | 13.1 (12.3)  | 19.8 (8.9)   | 17.8 (6.2) | 18 (4.4)    | 16.4 (3.1)  | 16.1 (1.8)  |
|             |           |         | SINTAX         | <0.1 (<0.1)       | <0.1 (<0.1)  | <0.1 (<0.1)  | 2.9 (8.9)    | 1.5 (4.3)    | 0.3 (0.5)    | 0.6 (1.3)  | 0.1 (0.1)   | 0.3 (0.4)   | 0.2 (0.1)   |

SE=Single-end, PE=Paired-end

Table 22: Per class error rates, 100,000 reads

| Read Length | Region    | Samples | Method         | Shannon Diversity |             |             |             |              |              |              |              |             |             |             |
|-------------|-----------|---------|----------------|-------------------|-------------|-------------|-------------|--------------|--------------|--------------|--------------|-------------|-------------|-------------|
|             |           |         |                | [0,0.7)           | [0.7,1.4)   | [1.4,2)     | [2,2.7)     | [2.7,3.4)    | [3.4,4.1)    | [4.1,4.8)    | [4.8,5.5)    | [5.5,6.2)   | [6.2,6.9]   |             |
| 301bp PE    | Full gene | 170     | Karp           | 0.3 (0.3)         | 0.7 (1.2)   | 0.5 (0.6)   | 0.6 (0.5)   | 0.7 (0.4)    | 0.9 (0.7)    | 0.7 (0.2)    | 0.8 (0.1)    | 0.8 (0.2)   | 0.8 (0.1)   |             |
|             |           |         | Karp-Collapse  | 0.1 (0.2)         | 0.3 (0.9)   | 0.1 (0.1)   | 0.3 (0.6)   | 0.1 (0.1)    | 0.2 (0.2)    | 0.1 (0.1)    | 0.2 (0.1)    | 0.2 (0.1)   | 0.2 (0.1)   | 0.1 (<0.1)  |
|             |           |         | UCLUST         | <0.1 (<0.1)       | <0.1 (<0.1) | <0.1 (<0.1) | <0.1 (<0.1) | <0.1 (<0.1)  | <0.1 (<0.1)  | <0.1 (<0.1)  | <0.1 (<0.1)  | <0.1 (<0.1) | <0.1 (<0.1) | <0.1 (<0.1) |
|             |           |         | SortMeRNA      | 0.2 (0.2)         | 0.3 (0.6)   | 0.4 (0.7)   | 0.2 (0.2)   | 0.4 (0.1)    | 0.8 (0.9)    | 0.7 (0.1)    | 0.9 (0.2)    | 1 (0.2)     | 1.3 (0.1)   |             |
|             |           |         | Kallisto       | 42 (36)           | 66.4 (37.6) | 79.9 (32.1) | 83.3 (17.9) | 91.8 (23.1)  | 87.5 (16.9)  | 91.5 (19.1)  | 84.8 (7.7)   | 85.7 (7.6)  | 82.2 (5.4)  |             |
|             |           |         | USEARCH61      | <0.1 (<0.1)       | <0.1 (<0.1) | <0.1 (<0.1) | <0.1 (<0.1) | <0.1 (<0.1)  | <0.1 (<0.1)  | <0.1 (<0.1)  | <0.1 (0.1)   | <0.1 (<0.1) | <0.1 (<0.1) |             |
|             |           |         | Mothur NB      | 4.1 (13.1)        | 7.4 (13.6)  | 4.4 (6.6)   | 3.4 (4.9)   | 7.9 (10.6)   | 6.2 (2.8)    | 4.4 (1.5)    | 4 (2.1)      | 3.6 (0.8)   | 2.9 (0.6)   |             |
|             |           |         | 16S Classifier | 86.1 (65.9)       | 96.4 (63.8) | 97.5 (33.9) | 75.5 (32)   | 84.9 (19.8)  | 84.9 (15)    | 74.5 (8.2)   | 75.1 (10.3)  | 72.4 (3.8)  | 72.4 (2.6)  |             |
|             |           |         | SINTAX         | <0.1 (<0.1)       | <0.1 (<0.1) | <0.1 (<0.1) | <0.1 (<0.1) | <0.1 (<0.1)  | 0.1 (0.4)    | 0.1 (0.3)    | 0.1 (0.1)    | <0.1 (0.1)  | <0.1 (<0.1) |             |
|             | V4        | 190     | Karp           | 0.3 (0.7)         | 0.6 (0.6)   | 0.9 (1.1)   | 1 (1.1)     | 1.6 (3)      | 0.8 (0.5)    | 0.7 (0.2)    | 0.7 (0.2)    | 0.8 (0.2)   | 0.8 (0.1)   |             |
|             |           |         | Karp-Collapse  | <0.1 (<0.1)       | <0.1 (<0.1) | <0.1 (<0.1) | <0.1 (<0.1) | <0.1 (<0.1)  | <0.1 (<0.1)  | <0.1 (<0.1)  | <0.1 (<0.1)  | <0.1 (<0.1) | <0.1 (<0.1) |             |
|             |           |         | UCLUST         | <0.1 (<0.1)       | <0.1 (<0.1) | <0.1 (<0.1) | <0.1 (<0.1) | <0.1 (<0.1)  | <0.1 (<0.1)  | <0.1 (<0.1)  | <0.1 (<0.1)  | <0.1 (<0.1) | <0.1 (<0.1) |             |
|             |           |         | SortMeRNA      | <0.1 (<0.1)       | <0.1 (<0.1) | <0.1 (<0.1) | 0.1 (<0.1)  | 1.2 (3.5)    | 0.2 (<0.1)   | 0.2 (<0.1)   | 0.3 (0.1)    | 0.3 (0.1)   | 0.2 (<0.1)  |             |
|             |           |         | Kallisto       | 58.9 (48.5)       | 95.1 (42.1) | 81.9 (31.7) | 107.7 (16)  | 103.4 (23.8) | 110.3 (13.7) | 109.6 (14.7) | 114.6 (14.8) | 113.5 (7.3) | 111.5 (5.3) |             |
|             |           |         | USEARCH61      | <0.1 (<0.1)       | <0.1 (<0.1) | <0.1 (<0.1) | <0.1 (<0.1) | <0.1 (<0.1)  | <0.1 (<0.1)  | <0.1 (<0.1)  | <0.1 (<0.1)  | <0.1 (<0.1) | <0.1 (<0.1) |             |
|             |           |         | Mothur NB      | 39.2 (57.3)       | 35.5 (38.5) | 17.4 (9.9)  | 21.3 (8.6)  | 19.1 (7.8)   | 16.3 (4.5)   | 12.1 (2.5)   | 10.1 (3)     | 6.8 (1.5)   | 4.8 (1.1)   |             |
|             |           |         | 16S Classifier | 1.8 (4.9)         | 11.4 (31.7) | 13.6 (28.7) | 18.2 (28.6) | 14.8 (24.3)  | 13.1 (10.7)  | 16 (7.6)     | 15.7 (4.5)   | 13.8 (3.9)  | 14.3 (1.7)  |             |
|             |           |         | SINTAX         | <0.1 (<0.1)       | <0.1 (<0.1) | <0.1 (<0.1) | <0.1 (<0.1) | <0.1 (<0.1)  | <0.1 (<0.1)  | 0.2 (0.5)    | <0.1 (<0.1)  | 0.2 (0.3)   | 0.1 (0.1)   |             |

SE=Single-end, PE=Paired-end
