# Supplementary material for: Using pseudoalignment and base quality to accurately quantify microbial community composition
Source: PubMed Central journal article supplement (PMC5945057; doi:10.1371/journal.pcbi.1006096), 2018-04-16

**A**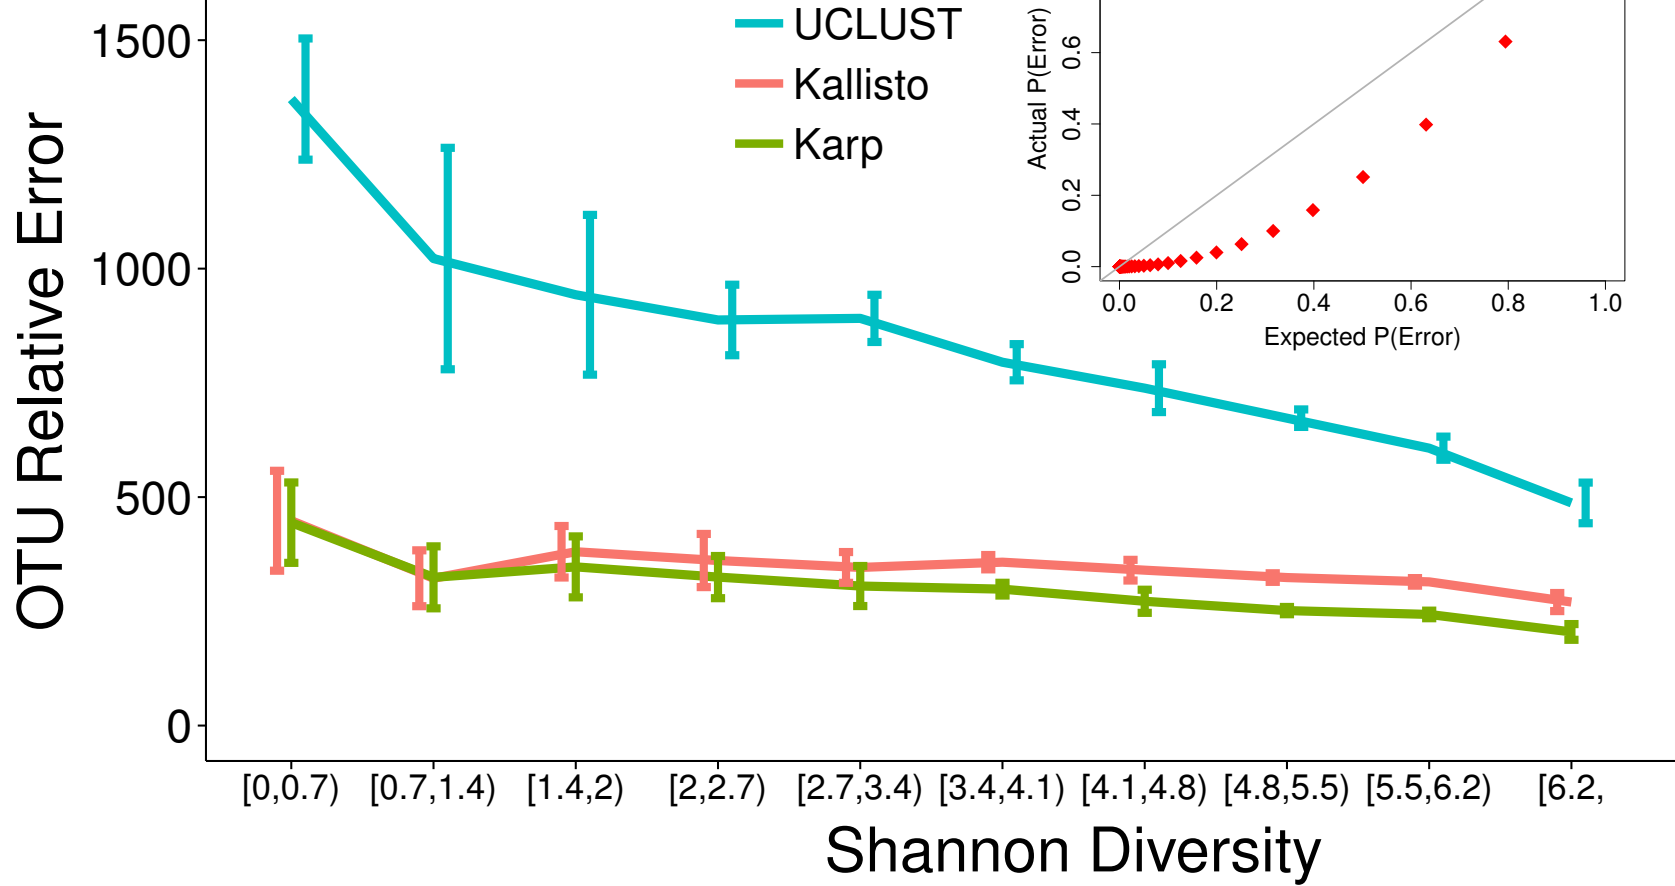**B**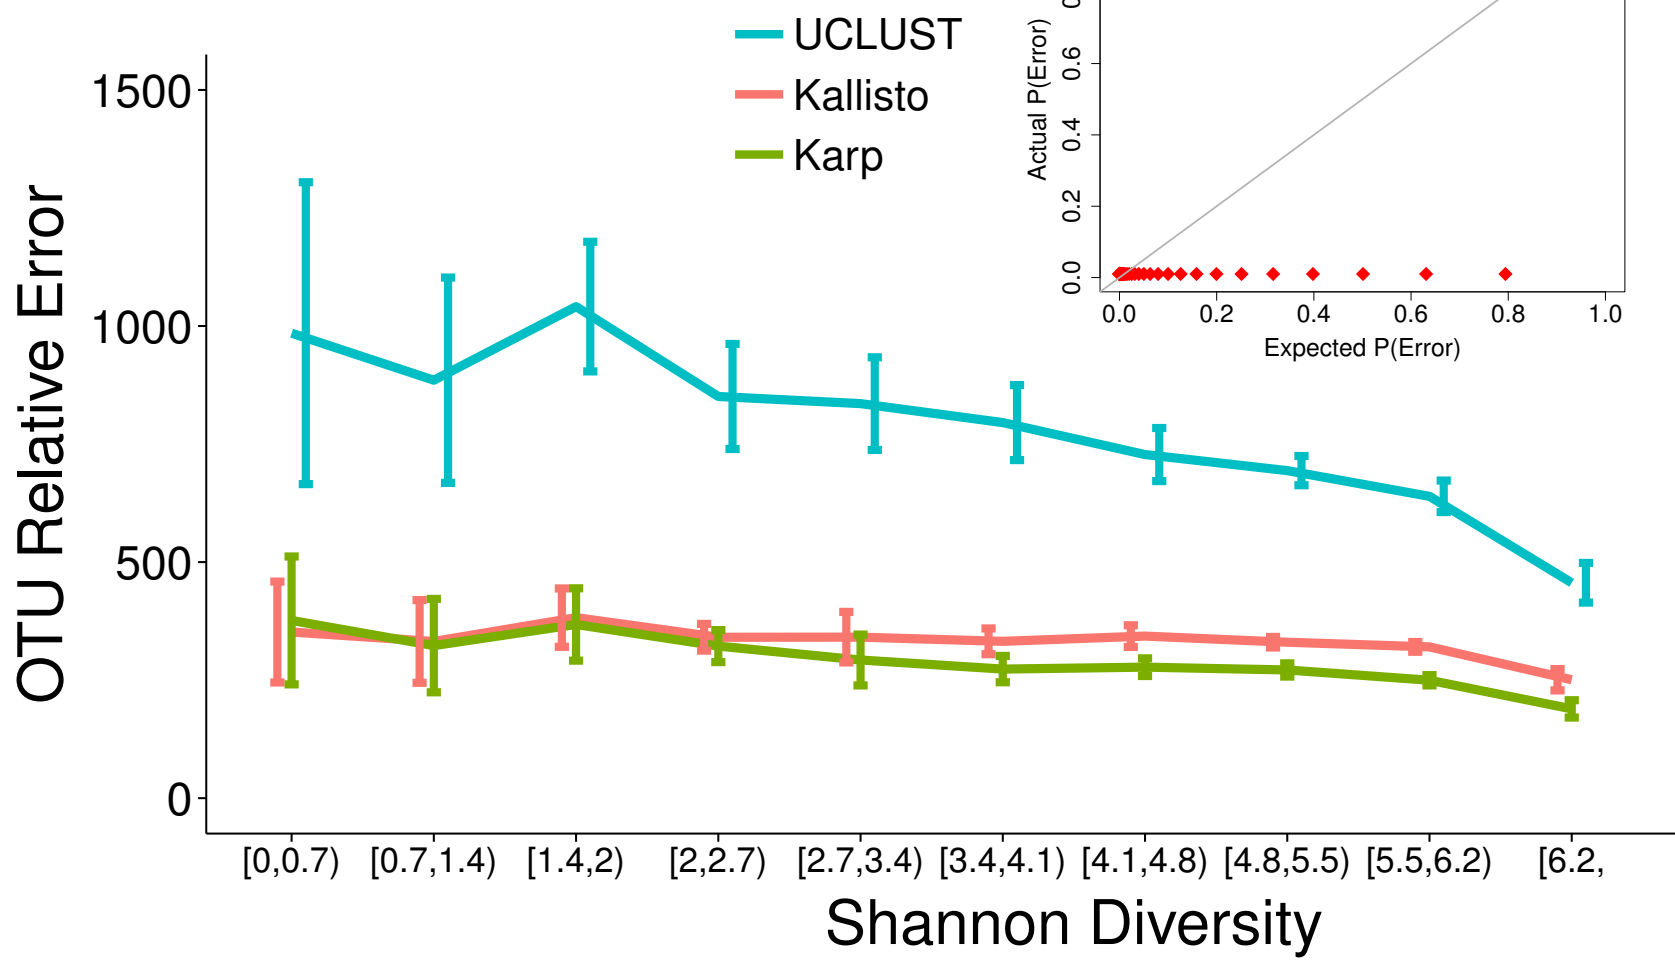

Supplement: pcbi.1006096.s009.pdf [file pcbi.1006096.s009.pdf]
