# Supplementary material for: Using pseudoalignment and base quality to accurately quantify microbial community composition
Source: PubMed Central journal article supplement (PMC5945057; doi:10.1371/journal.pcbi.1006096), 2018-04-16
Supplement: pcbi.1006096.s011.pdf [file pcbi.1006096.s011.pdf]

| FDR           | Total associations |      |     | Distinct genera found to be associated |      |     | Proportion associations found by another method |      |      |
|---------------|--------------------|------|-----|----------------------------------------|------|-----|-------------------------------------------------|------|------|
|               | 0.01               | 0.05 | 0.1 | 0.01                                   | 0.05 | 0.1 | 0.01                                            | 0.05 | 0.1  |
| Karp Full     | 4                  | 40   | 121 | 4                                      | 26   | 45  | 0.5                                             | 0.33 | 0.33 |
| Karp Collapse | 12                 | 53   | 131 | 11                                     | 32   | 51  | 0.17                                            | 0.28 | 0.32 |
| Kallisto      | 9                  | 38   | 95  | 9                                      | 27   | 42  | 0.22                                            | 0.29 | 0.26 |
| UCLUST        | 8                  | 42   | 120 | 6                                      | 18   | 34  | 0.125                                           | 0.26 | 0.2  |

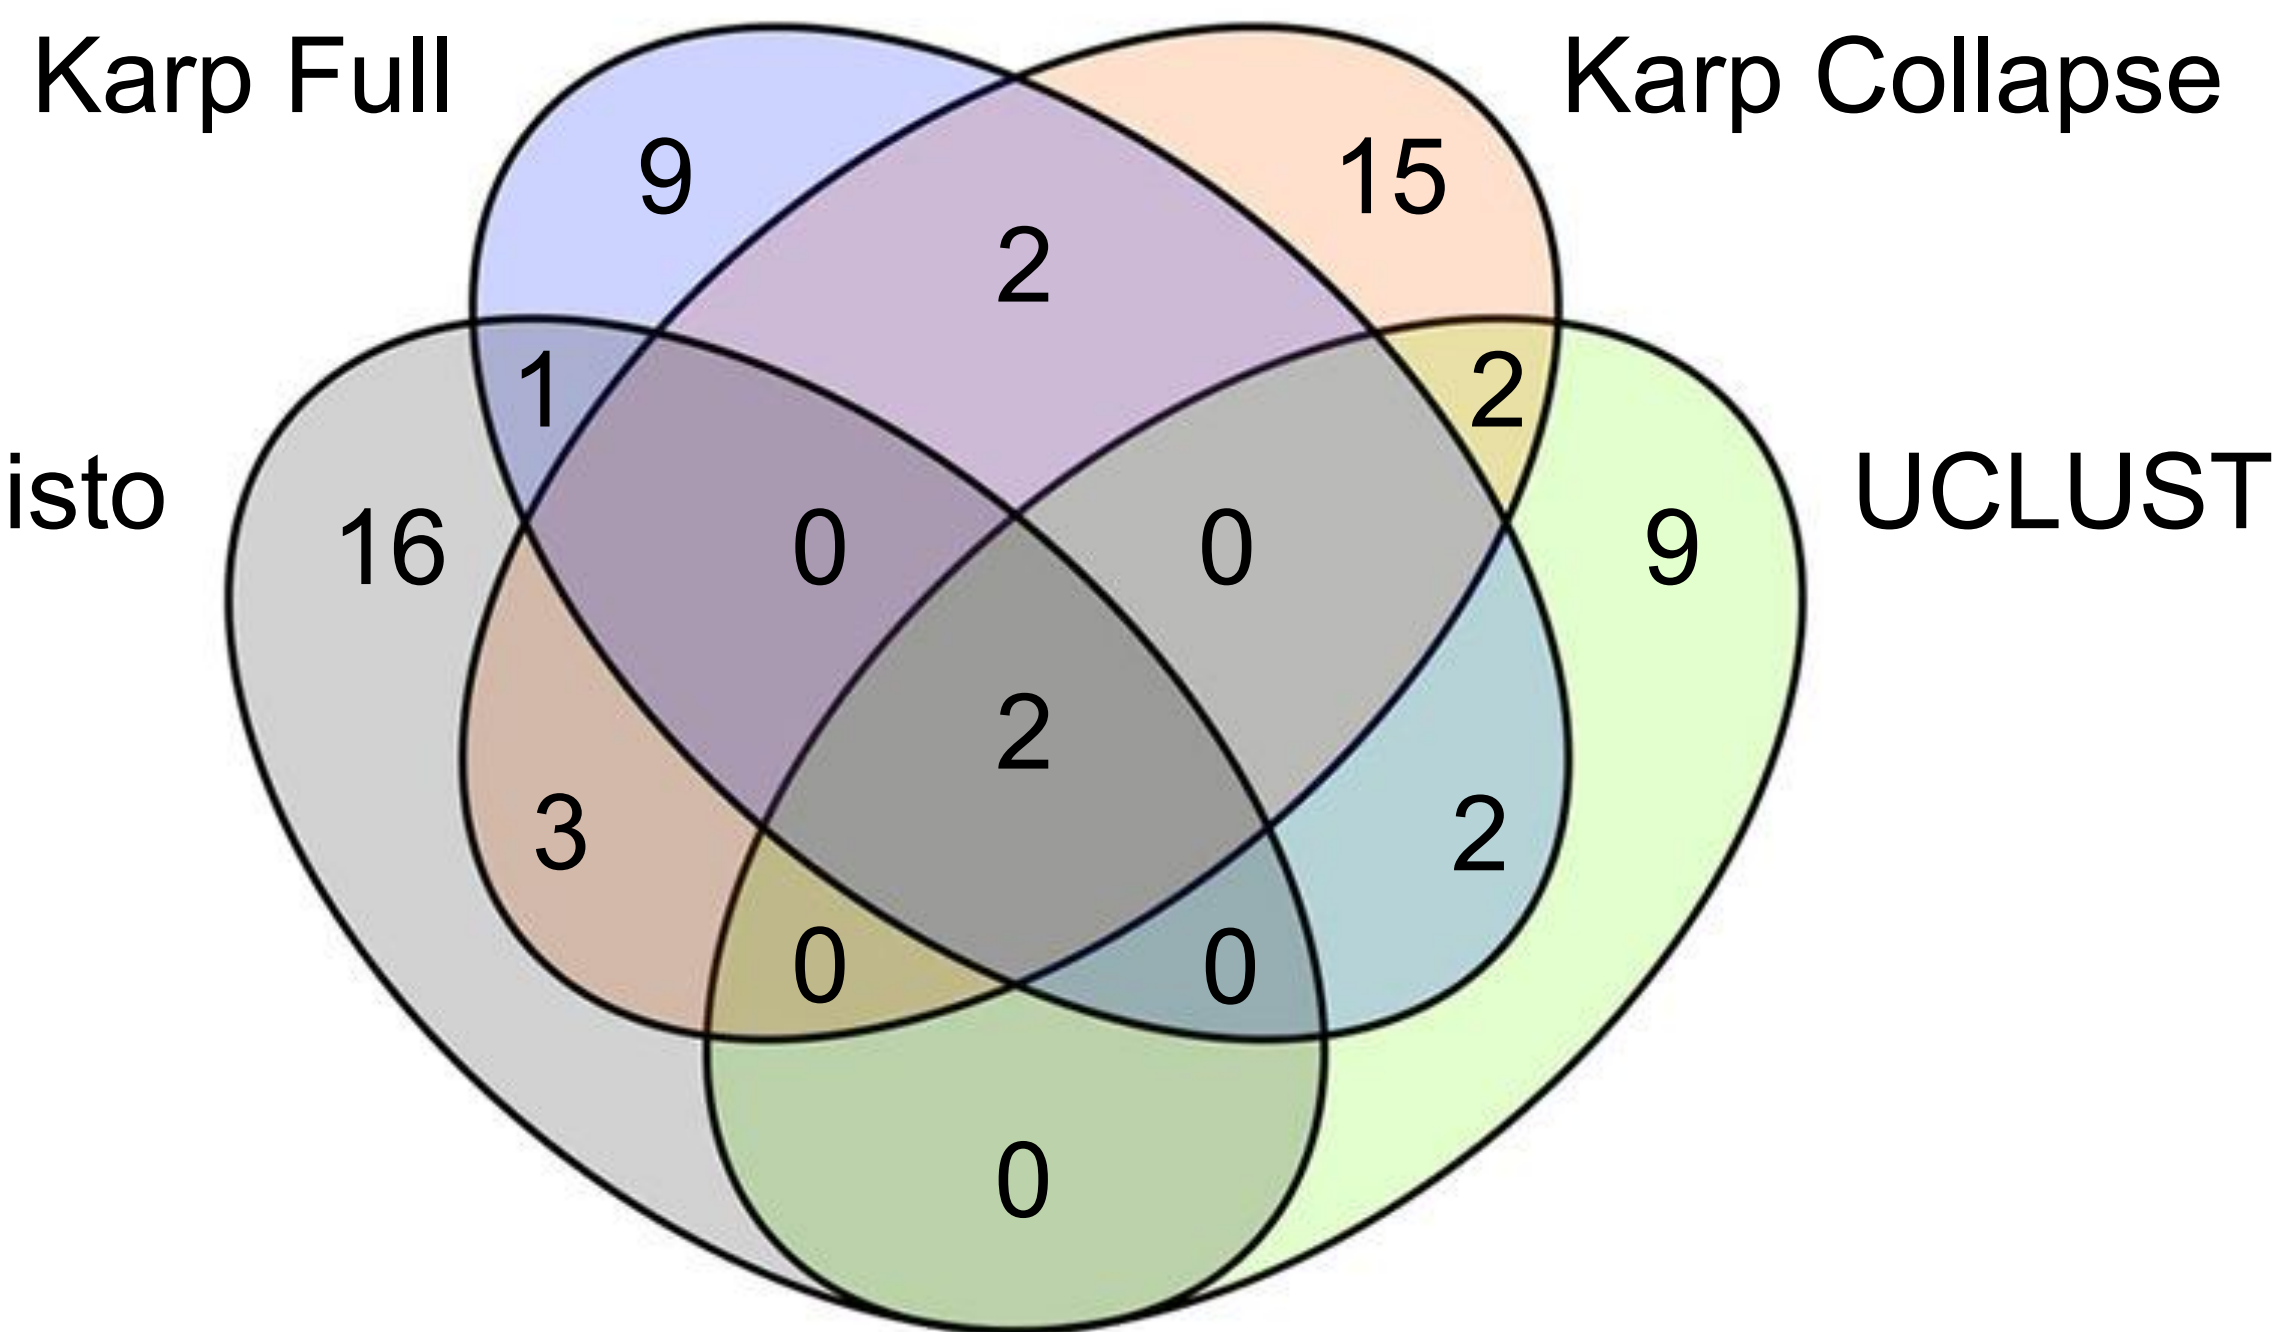

Summer Nasopharynx

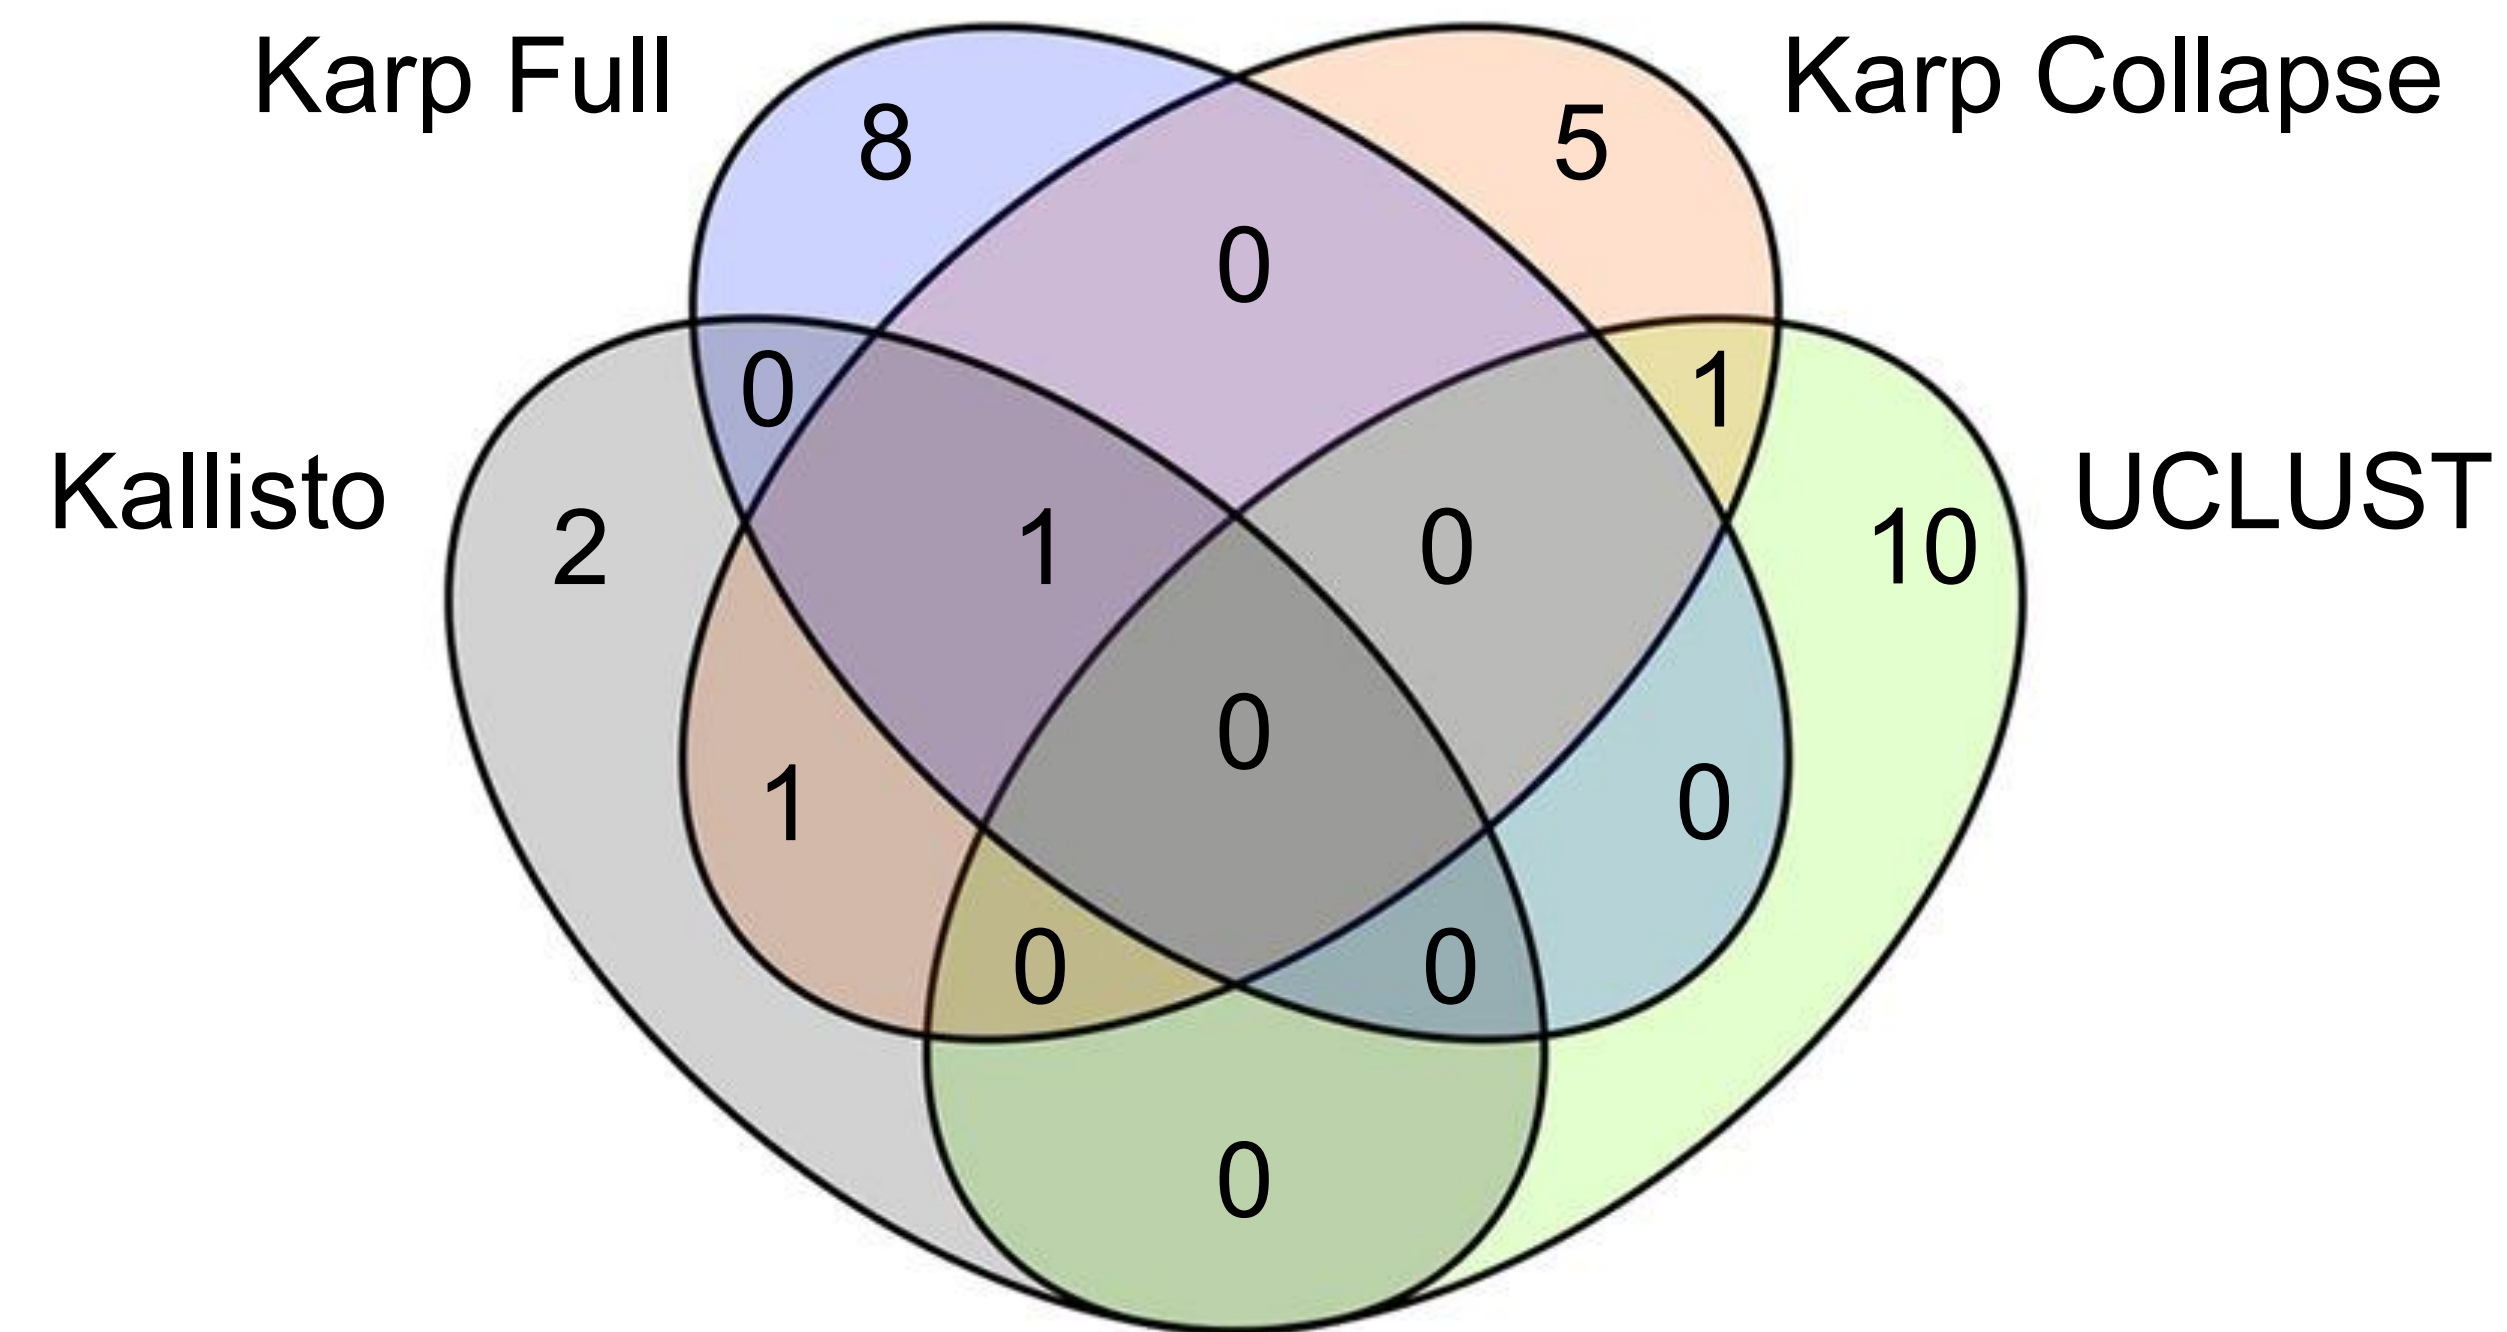

Winter Nasopharynx

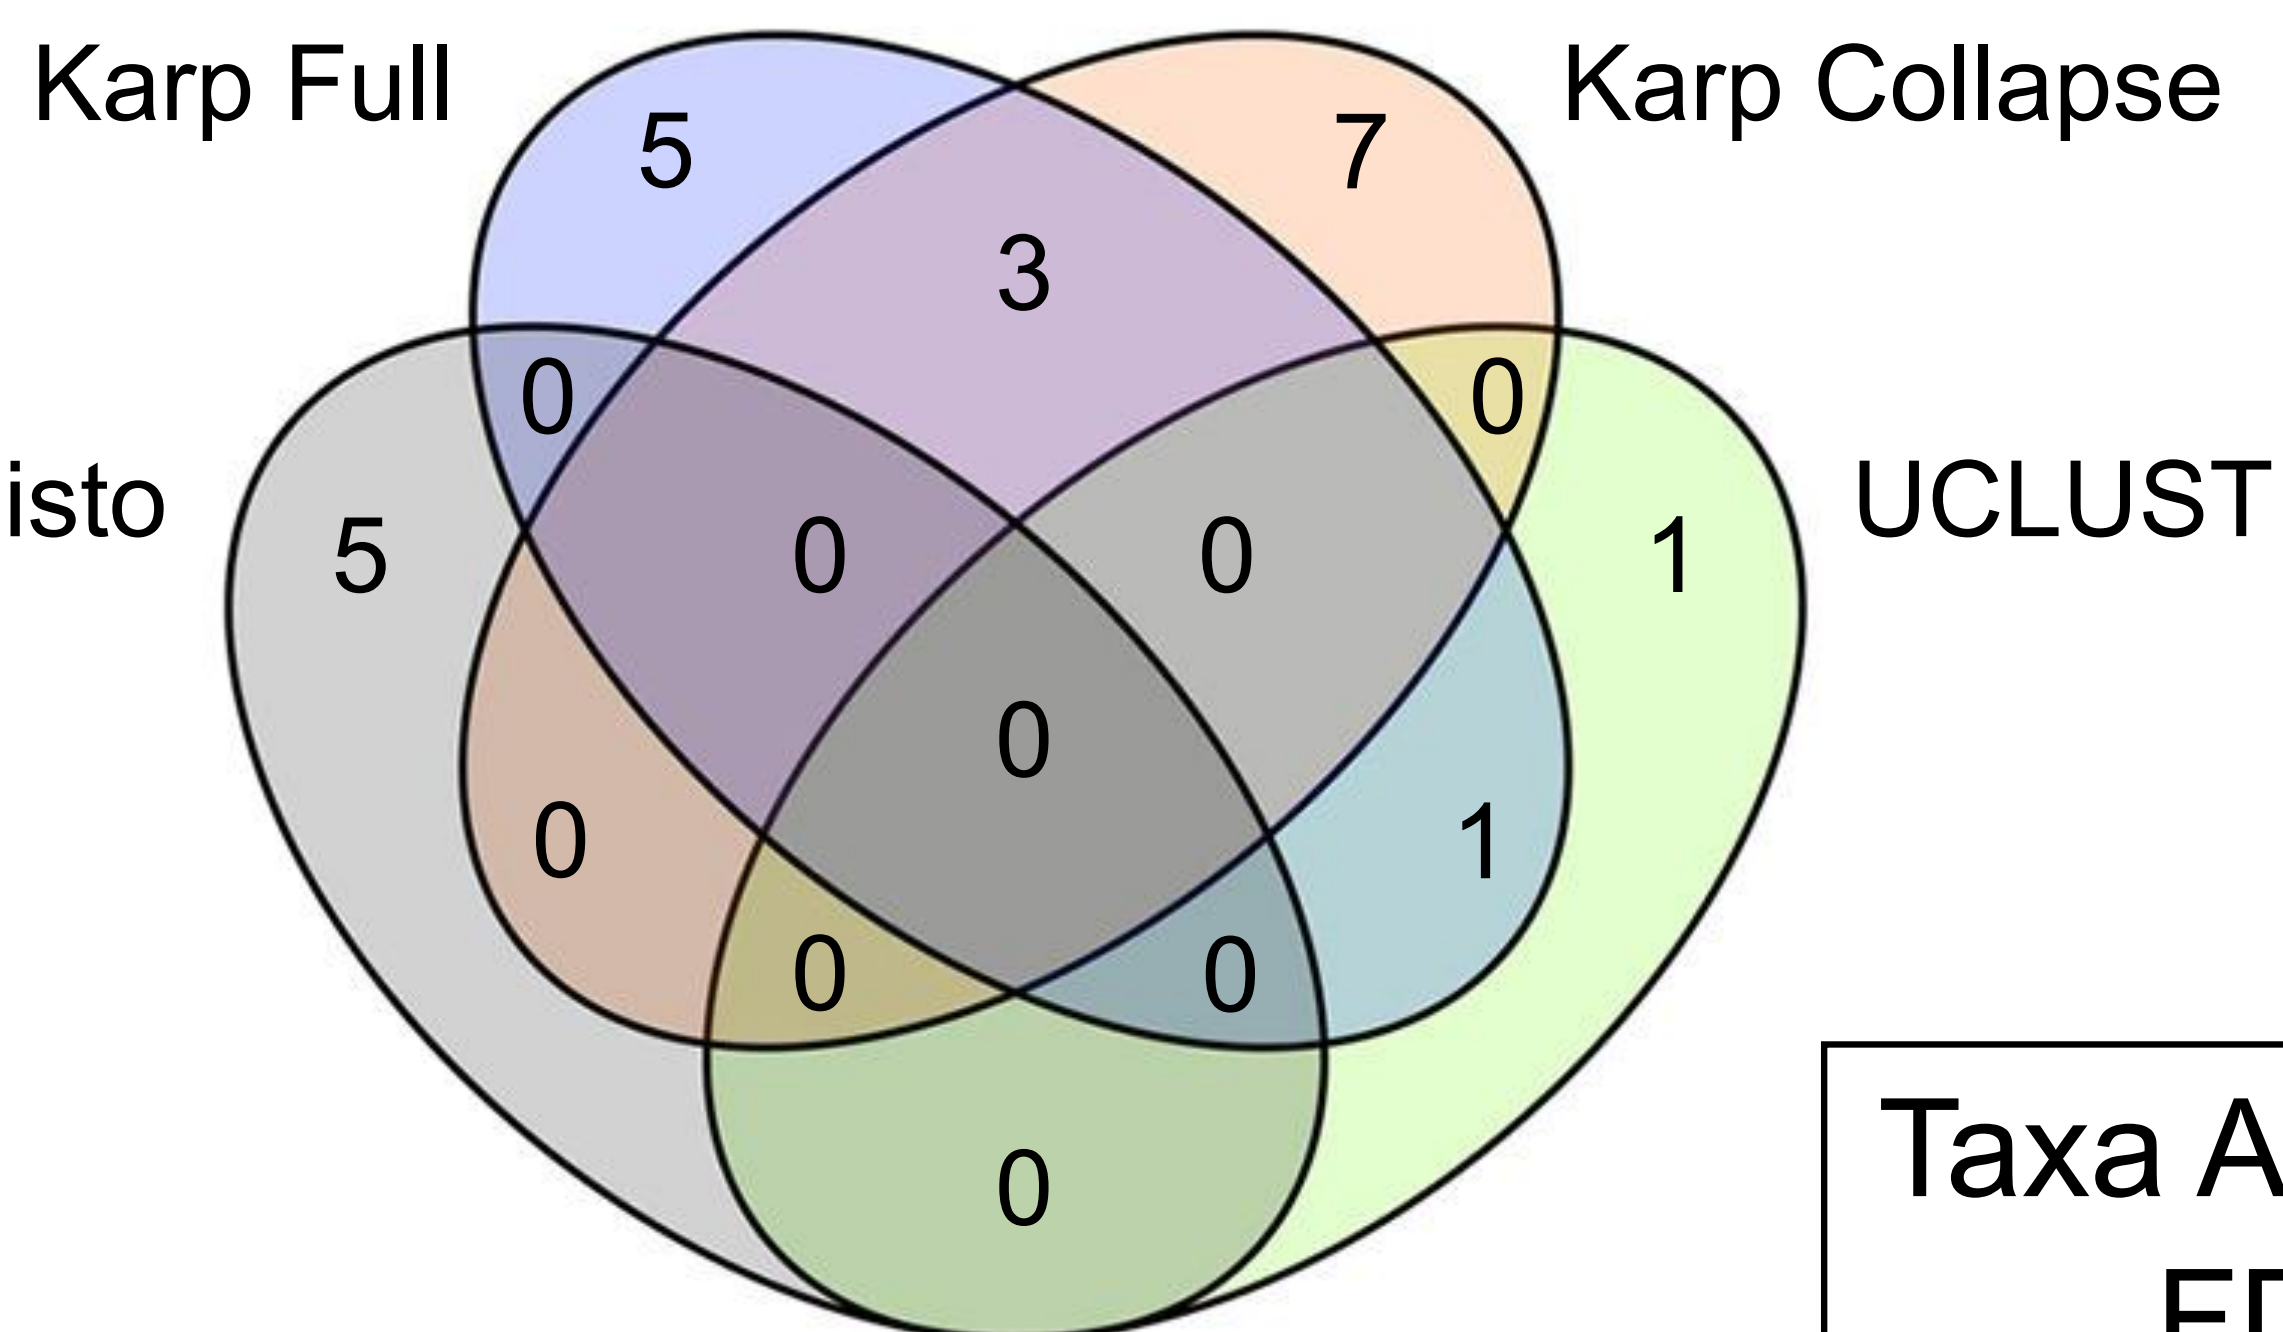

Summer Vestibule

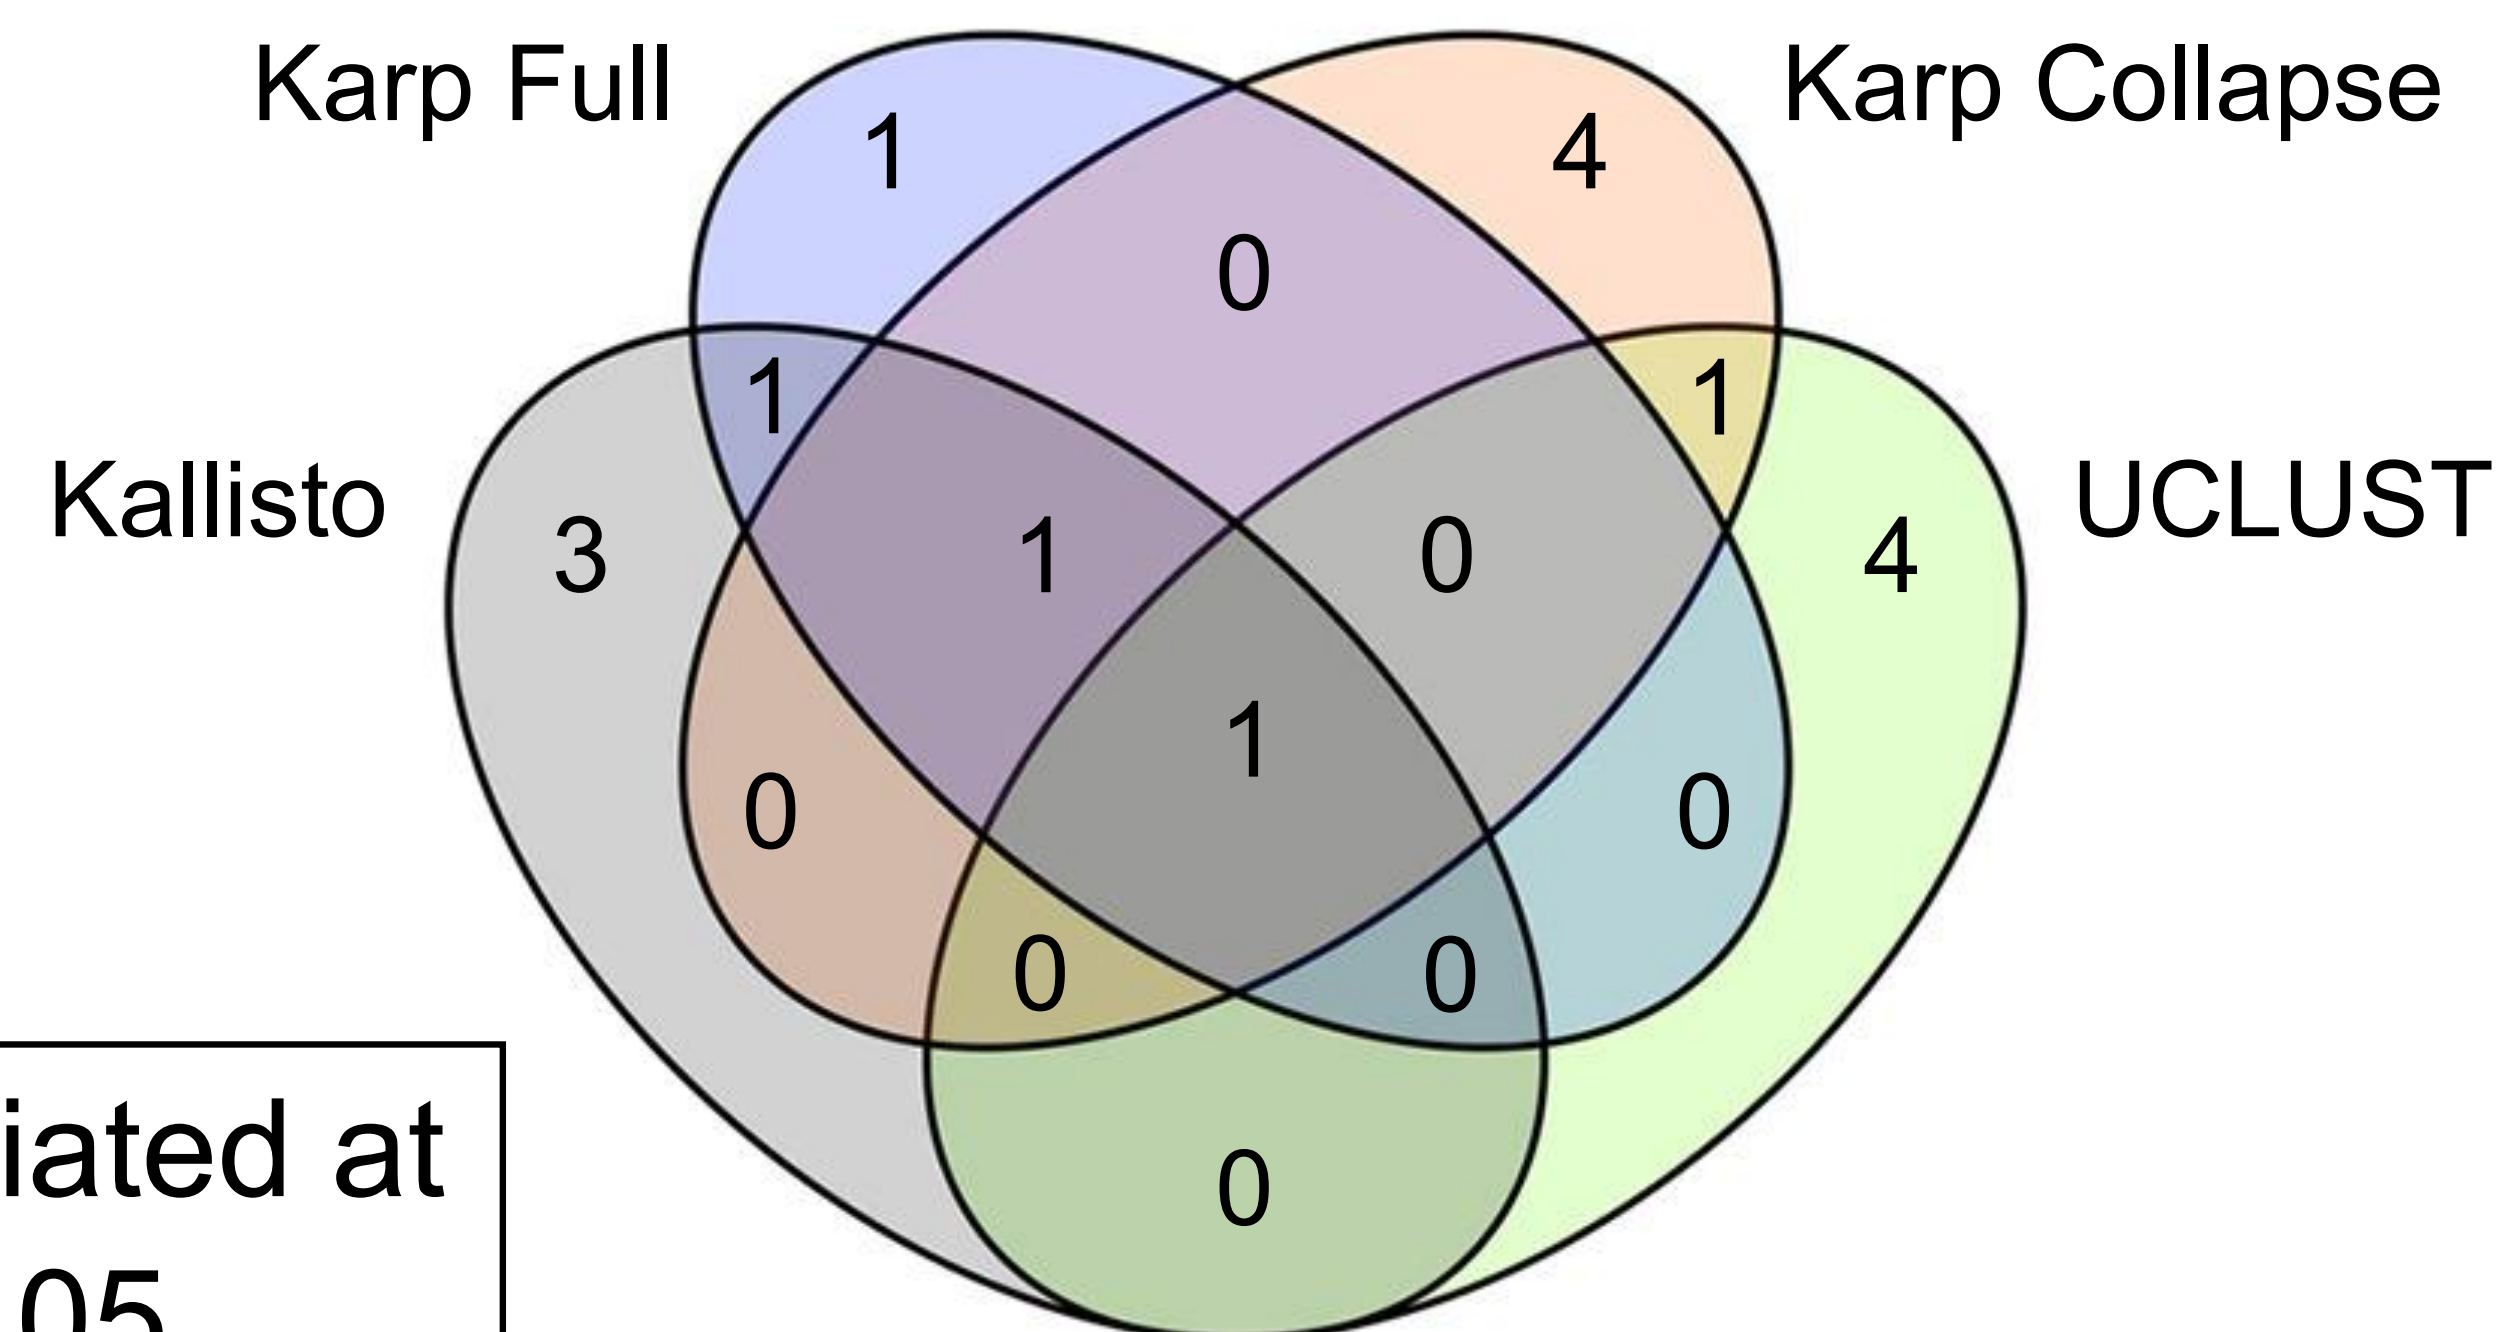

Winter Vestibule

Taxa Associated at  
FDR 0.05
